# Supplementary material for: Synthesis of organo-uranium(ii) species in the gas-phase using reactions between [UH]+ and nitriles
Source: Royal Society of Chemistry journal article supplement (doi:10.1039/d4dt02508c), 2024-11-07
Supplement: d4dt02508c1.pdf [file d4dt02508c1.pdf]

This supplemental information document includes additional experimental details and computational data as referenced in the text.

## Experimental Methods

### Sample preparation

Methanol ( $\text{CH}_3\text{OH}$ ), acetonitrile ( $\text{CH}_3\text{CN}$ ), acrylonitrile ( $\text{CH}_2\text{CHCN}$ ), propionitrile ( $\text{CH}_3\text{CH}_2\text{CN}$ ), buytronitrile ( $\text{CH}_3\text{CH}_2\text{CH}_2\text{CN}$ ), and benzonitrile ( $\text{C}_6\text{H}_5\text{CN}$ ) were purchased from Sigma-Aldrich Chemical (St Louis, MO) and used as received. A sample of uranyl propiolate was prepared as described previously by combining 2–3 mg of  $\text{U}^{\text{VI}}\text{O}_3$  (Strem Chemicals, Newburyport MA), corresponding to approximately  $7 \times 10^{-6}$  to  $1 \times 10^{-5}$  mol, with 2–3 mL of propiolic acid ( $\text{HO}_2\text{C}-\text{C}\equiv\text{CH}$ , Sigma Aldrich, St Louis MO) and 400 mL of deionized/distilled  $\text{H}_2\text{O}$  in a glass scintillation vial. *Caution: uranium oxide is radioactive ( $\alpha$ - and  $\beta$ -emitter), and proper shielding, waste disposal and personal protective gear should be used when handling the material.*

### Mass spectrometry experiments

The formation of  $[\text{UH}]^+$  from a  $\text{UO}_2^{2+}$  precursor and its corresponding dissociation mechanism have been thoroughly detailed elsewhere. Methanol ( $\text{CH}_3\text{OH}$ ) and propiolic acid were sourced from Sigma-Aldrich Chemical (St. Louis, MO) and used without further purification. Uranyl propiolate was synthesized in-house by reacting solid  $\text{UO}_3$  (Strem Chemicals, Newburyport MA) with aqueous propiolic acid. The generation of the  $[\text{O}=\text{U}\equiv\text{CH}]^+$  intermediate from uranyl propiolate precursors via preparative tandem ion trap mass spectrometry (PTMS<sup>n</sup>) was accomplished following an established protocol. In brief, electrospray ionization (ESI) and collision-induced dissociation (CID) experiments were conducted using a ThermoScientific (San Jose, CA) LTQ-XL linear ion trap mass spectrometer, which had been modified to facilitate the study of ion-molecule reactions. The atmospheric pressure ionization stack parameters were optimized to maximize the transmission of  $[\text{UO}_2(\text{O}_2\text{C}-\text{C}\equiv\text{CH})(\text{CH}_3\text{OH})_2]^+$  ( $m/z$  403) to the ion trap using the auto-tune feature in the LTQ Tune program. Helium served as the bath/buffer gas in the CID experiments. Target ions were isolated with a width of 1.0 to 1.5  $m/z$  units, chosen empirically to achieve maximum ion intensity while isolating a single isotopic peak. The normalized collision energy (NCE) and activation Q values for CID of  $[\text{UO}_2(\text{C}\equiv\text{CH})]^+$  were set to 20% and 0.35, respectively. For CID of  $[\text{O}=\text{U}\equiv\text{CH}]^+$ , the NCE was set to 18% and the activation Q to 0.33, while for CID of  $[\text{UH}]^+$ , the settings were 22% and 0.75, respectively.

The linear ion trap was modified to enable the mixing of neutral liquid and gaseous reagents with the helium buffer gas before their introduction into the ion trap. Liquid reagents were introduced into the system via a metered syringe pump, where they were vaporized. The partial pressure of these reagents was controlled through the syringe pump flow rate, helium flow rate, and by adjusting the temperature of the manifold, which was managed by wrapping the manifold tubing with a temperature-controlled water coil. All gas ports were regulated using manually actuated precision needle valves, allowing fine control of the flow rates.

To investigate gas-phase reactions of  $[\text{UH}]^+$  with background neutrals, ions were isolated using widths of 1–2  $m/z$  units, selected empirically to ensure optimal ion isolation efficiency. The ions were then stored in the LIT for periods ranging from 1 ms to 10 s. For ion-molecule reaction (IMR) studies, the goal was to identify the reaction pathways of ions with nitrile neutrals in the LIT rather than to measure rates or rate constants. The specific isolation times were selected to illustrate the general changes in precursor and product ion intensities as isolation time varied, confirming that specific ions were generated by bimolecular reactions within the ion trap. Since the experiments utilized the multi-dimensional tandem mass spectrometry capabilities of the linear ion trap, care was taken to ensure sufficient neutral reagent was present in the ion trap for ion-molecule reaction studies, without compromising the synthesis of reactive species through multiple initial CID steps in series. For both CID and IMR experiments, the displayed mass spectra were generated by accumulating and averaging at least 30 isolation, dissociation, and ejection/detection cycles.

### **CID Process**

Collision-induced dissociation (CID) is often referred to as a slow heating process, meaning that the ions being studied gradually gain energy through multiple collisions with inert gas molecules (in this case He), leading to bond dissociation along the lowest energy pathways. Normalized collision energy (NCE) is the unit used to perform CID, where ions are accelerated using a separate RF frequency voltage. Essentially, the higher the NCE, the more kinetic energy the ions have, and thus, more internal energy is imposed with collisions with helium. The activation  $Q$  is a unit that describes how tightly the ions are being held in the trap. In an ion trap mass spectrometer, the activation  $Q$  ( $Q_z$ ) is directly related to the ion's secular frequency and the RF voltage applied, which defines the depth of the potential well in which the ions are confined. When the activation  $Q$  is set lower, the RF voltage creates a deeper potential well, meaning ions are more tightly trapped, with less motion and lower excitation. This stronger confinement limits the amount of energy transferred to the ions during collision-induced dissociation (CID). In contrast, a higher activation  $Q$  creates a shallower potential well, allowing ions to move more freely, absorb more energy during collisions, and undergo more energetic fragmentation. However, the shallow well also increases the likelihood that ions will escape the trap before they dissociate, leading to signal loss.

To balance these effects, the normalized collision energy (NCE) must be adjusted in conjunction with the activation  $Q$ . A lower activation  $Q$  requires less NCE because the ions are tightly confined and only need a small amount of energy to undergo dissociation. Conversely, at a higher activation  $Q$ , the shallow potential well means the ions need more energy to ensure sufficient excitation for fragmentation. Therefore, increasing the NCE at higher activation  $Q$  compensates for the shallower well, allowing the ions to gain enough energy to fragment, but this also comes with the trade-off of potentially losing low-energy products and reducing ion trapping efficiency. Optimizing both the activation  $Q$  and NCE is crucial to ensure the desired fragmentation while maintaining ion confinement.

### **Computational methodology**

Kohn–Sham DFT calculations were carried out using the Gaussian16<sup>1</sup> quantum chemistry software. For uranium and iodine, the Stuttgart Dresden basis set (SDD-VDZ-MWB)<sup>2</sup> was applied, along with its corresponding small-core quasi-relativistic effective core potential (MWB60). For the other elements in the system, the 6-311+g(d,p) Pople triple- $\zeta$  basis set with diffuse functions was utilized. The structures of reactants, intermediates, transition states, and products were optimized using two different density functionals, B3LYP and PBE0 (PBE1PBE). The selection of these density functionals and basis sets was

informed by their successful application in prior computational studies on uranium oxides and related species. All identified transition states were verified through intrinsic reaction coordinate (IRC) calculations. The relative energies obtained with B3LYP and PBE0 were in reasonable agreement, though PBE0 consistently predicted higher energy values than B3LYP. Calculations for singlet states were conducted using the restricted Kohn–Sham formalism, while triplet and quintet states were evaluated using the unrestricted formalism. Although spin–orbit corrections could potentially influence the energies of reaction intermediates and transition states involving different uranium oxidation states, this effect does not significantly impact the key interpretations derived from the computed relative energies. Details of the potential energy surfaces and additional computational specifics are provided in the ESI.

## References

- 1 *Gaussian 16, Revision C.01*, M. J. Frisch, G. W. Trucks, H. B. Schlegel, G. E. Scuseria, M. A. Robb, J. R. Cheeseman, G. Scalmani, V. Barone, G. A. Petersson, H. Nakatsuji, X. Li, M. Caricato, A. V. Marenich, J. Bloino, B. G. Janesko, R. Gomperts, B. Mennucci, H. P. Hratchian, J. V. Ortiz, A. F. Izmaylov, J. L. Sonnenberg, D. Williams-Young, F. Ding, F. Lipparini, F. Egidi, J. Goings, B. Peng, A. Petrone, T. Henderson, D. Ranasinghe, V. G. Zakrzewski, J. Gao, N. Rega, G. Zheng, W. Liang, M. Hada, M. Ehara, K. Toyota, R. Fukuda, J. Hasegawa, M. Ishida, T. Nakajima, Y. Honda, O. Kitao, H. Nakai, T. Vreven, K. Throssell, J. A. Montgomery Jr., J. E. Peralta, F. Ogliaro, M. J. Bearpark, J. J. Heyd, E. N. Brothers, K. N. Kudin, V. N. Staroverov, T. A. Keith, R. Kobayashi, J. Normand, K. Raghavachari, A. P. Rendell, J. C. Burant, S. S. Iyengar, J. Tomasi, M. Cossi, J. M. Millam, M. Klene, C. Adamo, R. Cammi, J. W. Ochterski, R. L. Martin, K. Morokuma, O. Farkas, J. B. Foresman, D. J. Fox, Gaussian, Inc., Wallingford CT, 2016.
- 2 M. Dolg, H. Stoll, H. Preuss, *Theor. Chim. Acta*, 1993, **85**, 441–450. DOI: 10.1007/BF01113224.

Figure 1: Generation of  $[\text{UH}]^+$  ( $m/z$  239) from  $[\text{UO}_2(\text{O}_2\text{C}-\text{C}\equiv\text{CH})(\text{CH}_3\text{OH})_2]^+$  ( $m/z$  403)

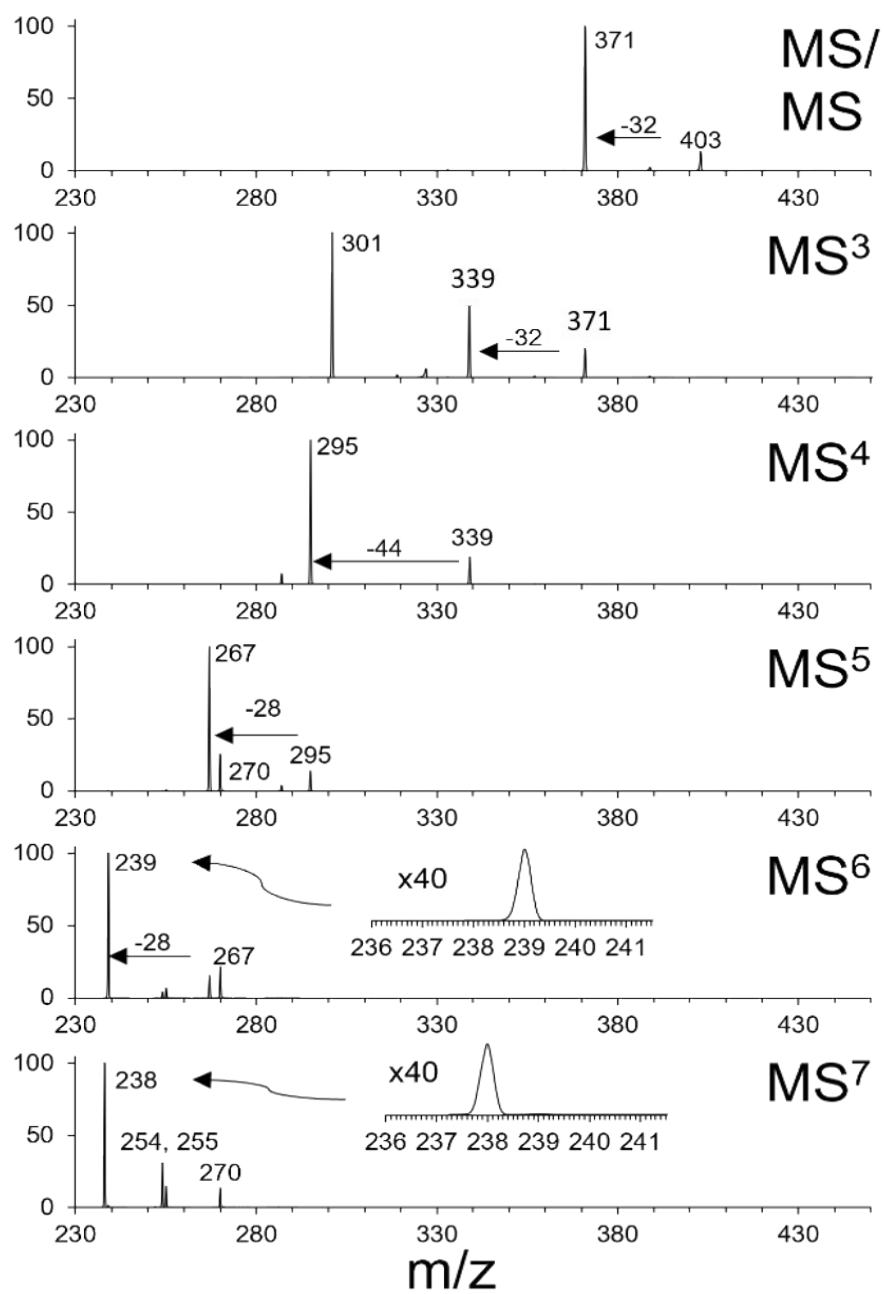

Figure 2: Isolation of  $[\text{UH}]^+$  and  $\text{U}^+$

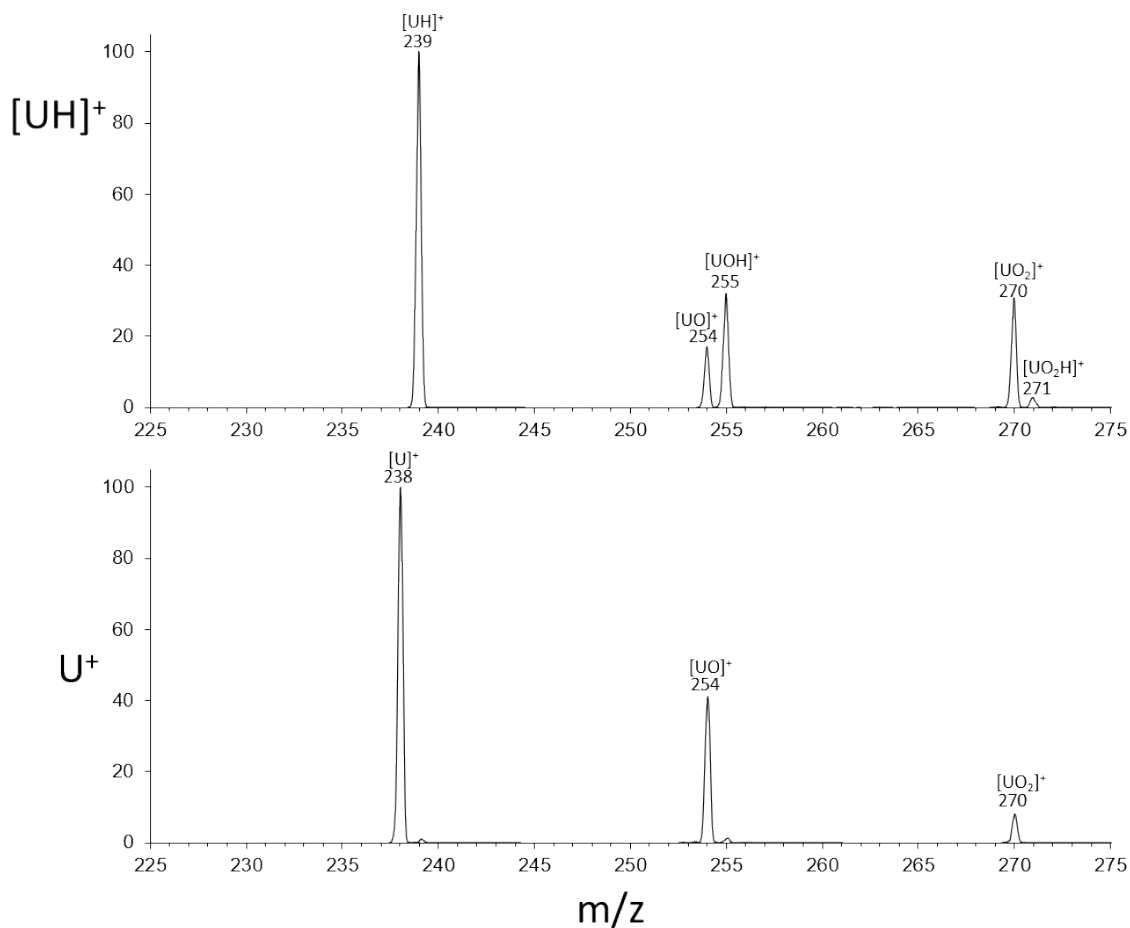

Figure 2: Isolation of  $[\text{UH}]^+$  (top) ( $m/z$  239) and  $\text{U}^+$  (bottom) ( $m/z$  238) for 100ms. Reactions observed are from background  $\text{O}_2$  and  $\text{H}_2\text{O}$ .

Table 1.1:  $[\text{UH}]^+ + \text{CH}_3\text{CN}$  B3LYP/SDD/6-311+g(d,p) Quintet Spin Energies (Hartree)

| Structure                                  | E0         | E_ZPE  | E_tot  | H_corr | G_corr  | E0+E_ZPE   | E0+E_tot   | E0+H_corr  | E0+G_corr  |
|--------------------------------------------|------------|--------|--------|--------|---------|------------|------------|------------|------------|
| $[\text{UH}]^+$                            | -477.20060 | .00371 | .00608 | .00702 | -.01919 | -477.19689 | -477.19453 | -477.19358 | -477.21980 |
| $\text{CH}_3\text{CN}$                     | -132.79616 | .04515 | .04876 | .04970 | .02113  | -132.75101 | -132.74740 | -132.74646 | -132.77503 |
| $[\text{UH}]^+ + \text{CH}_3\text{CN}$ (I) | -609.99676 | .04886 | .05483 | .05672 | .00194  | -609.94791 | -609.94193 | -609.94004 | -609.99483 |
| II                                         | -610.07653 | .04979 | .05617 | .05711 | .01601  | -610.02674 | -610.02037 | -610.01942 | -610.06053 |
| TSII→III                                   | -610.06089 | .05004 | .05540 | .05634 | .01754  | -610.01085 | -610.00549 | -610.00455 | -610.04336 |
| III                                        | -610.12038 | .05692 | .06239 | .06333 | .02416  | -610.06345 | -610.05799 | -610.05704 | -610.09621 |
| TSIII→IV                                   | -610.06935 | .04868 | .05545 | .05639 | .01421  | -610.02067 | -610.01391 | -610.01296 | -610.05514 |
| IV                                         | -610.07823 | .04974 | .05653 | .05748 | .01574  | -610.02849 | -610.02170 | -610.02076 | -610.06249 |
| $\text{HCN}$                               | -93.45449  | .01636 | .01890 | .01985 | -.00300 | -93.43813  | -93.43559  | -93.43465  | -93.45749  |
| $[\text{UCH}_3]^+$                         | -516.58290 | .03202 | .03595 | .03690 | .00328  | -516.55087 | -516.54694 | -516.54600 | -516.57961 |
| $[\text{UCH}_3]^+ + \text{HCN}$ (V)        | -610.03739 | .04839 | .05486 | .05675 | .00029  | -609.98900 | -609.98253 | -609.98064 | -610.03710 |

Table 1.1.1: [UH]<sup>+</sup> + CH<sub>3</sub>CN B3LYP/SDD/6-311+g(d,p) Quintet Spin Structure Coordinates

| Structure                     | Coordinates |           |           |           |
|-------------------------------|-------------|-----------|-----------|-----------|
| [UH] <sup>+</sup>             | U           | 0.000000  | 0.000000  | 0.021045  |
|                               | H           | 0.000000  | 0.000000  | -1.936098 |
| CH <sub>3</sub> CN            | C           | -1.924802 | 0.984461  | -0.000015 |
|                               | C           | -3.381457 | 0.984487  | -0.000000 |
|                               | H           | -3.758144 | 1.465575  | 0.904967  |
|                               | H           | -3.758156 | 1.527530  | -0.869198 |
|                               | H           | -3.758174 | -0.039776 | -0.035766 |
|                               | N           | -0.772097 | 0.984458  | 0.000013  |
| II                            | U           | -0.568238 | -0.039518 | -0.025738 |
|                               | H           | -0.623379 | -0.774579 | 1.845324  |
|                               | C           | 2.022213  | 0.150280  | -0.008388 |
|                               | N           | 1.349216  | 1.144560  | 0.141612  |
|                               | C           | 3.368560  | -0.448248 | -0.044018 |
|                               | H           | 4.121056  | 0.328227  | 0.123199  |
|                               | H           | 3.450121  | -1.213064 | 0.731741  |
|                               | H           | 3.540979  | -0.929040 | -1.009194 |
| TSII→III                      | U           | 0.055553  | -0.762879 | 0.280819  |
|                               | H           | -0.978521 | 0.643931  | 1.323840  |
|                               | C           | -0.126671 | 1.665677  | 0.216727  |
|                               | N           | -0.016144 | 1.051230  | -0.857499 |
|                               | C           | -0.320941 | 3.039071  | 0.727440  |
|                               | H           | -0.155408 | 3.102722  | 1.801625  |
|                               | H           | 0.366294  | 3.707460  | 0.201927  |
|                               | H           | -1.344366 | 3.360535  | 0.506435  |
| III                           | U           | -0.678000 | -0.024231 | -0.000002 |
|                               | H           | 2.951280  | 1.603103  | -0.000107 |
|                               | C           | 2.618267  | 0.556757  | 0.000019  |
|                               | N           | 1.364021  | 0.314390  | 0.000050  |
|                               | C           | 3.696885  | -0.467715 | 0.000028  |
|                               | H           | 4.339837  | -0.313333 | -0.874806 |
|                               | H           | 4.341327  | -0.312081 | 0.873496  |
|                               | H           | 3.304460  | -1.483379 | 0.000965  |
| TSIII→IV                      | U           | 0.543628  | -0.573200 | 0.579860  |
|                               | H           | 3.008398  | 2.547484  | 0.197218  |
|                               | C           | 2.208647  | 1.881180  | -0.077110 |
|                               | N           | 1.355581  | 1.301219  | -0.623916 |
|                               | C           | 2.024583  | -2.302497 | 0.055640  |
|                               | H           | 2.733808  | -2.124549 | -0.762218 |
|                               | H           | 2.616443  | -2.558822 | 0.950128  |
|                               | H           | 1.439170  | -3.198016 | -0.215256 |
| IV                            | U           | -0.177735 | -0.279305 | -0.013947 |
|                               | H           | 2.929578  | 1.105170  | -1.087934 |
|                               | C           | 2.134024  | 0.702957  | -0.461254 |
|                               | N           | 1.876331  | 0.480388  | 0.699745  |
|                               | C           | -1.321940 | 1.772149  | 0.025076  |
|                               | H           | -0.985848 | 2.430149  | 0.838286  |
|                               | H           | -1.195729 | 2.338005  | -0.909951 |
|                               | H           | -2.403193 | 1.609389  | 0.161586  |
| UCH <sub>3</sub> <sup>+</sup> | U           | -3.289712 | 1.030298  | -0.450766 |
|                               | C           | -1.044265 | 0.778059  | -0.038123 |
|                               | H           | -0.444203 | 1.483373  | -0.634672 |
|                               | H           | -0.808150 | 0.957408  | 1.022779  |
|                               | H           | -0.702269 | -0.239348 | -0.285902 |
| HCN                           | C           | 0.000000  | 0.000000  | -0.498334 |
|                               | H           | 0.000000  | 0.000000  | -1.564845 |

|  |   |           |          |          |
|--|---|-----------|----------|----------|
|  | N | -0.000000 | 0.000000 | 0.650693 |
|--|---|-----------|----------|----------|

Table 1.2: [UH]<sup>+</sup> + CH<sub>3</sub>CN PBE1PBE/SDD/6-311+g(d,p) Quintet Spin Energies (Hartree)

| Structure                                  | EO         | E_ZPE  | E_tot  | H_corr | G_corr  | EO+E_ZPE   | EO+E_tot   | EO+H_corr  | EO+G_corr  |
|--------------------------------------------|------------|--------|--------|--------|---------|------------|------------|------------|------------|
| [UH] <sup>+</sup>                          | -477.12109 | .00377 | .00614 | .00708 | -.01913 | -477.11732 | -477.11495 | -477.11401 | -477.14021 |
| CH <sub>3</sub> CN                         | -132.62746 | .04543 | .04903 | .04997 | .02143  | -132.58203 | -132.57844 | -132.57749 | -132.60603 |
| [UH] <sup>+</sup> + CH <sub>3</sub> CN (I) | -609.74855 | .04920 | .05516 | .05705 | .00230  | -609.69935 | -609.69339 | -609.69150 | -609.74625 |
| II                                         | -609.81206 | .05026 | .05656 | .05751 | .01653  | -609.76181 | -609.75550 | -609.75456 | -609.79554 |
| TSII→III                                   | -609.80275 | .05066 | .05592 | .05686 | .01822  | -609.75209 | -609.74683 | -609.74589 | -609.78453 |
| III                                        | -609.85514 | .05727 | .06273 | .06367 | .02451  | -609.79787 | -609.79241 | -609.79147 | -609.83063 |
| TSIII→IV                                   | -609.79517 | .05103 | .05685 | .05779 | .01824  | -609.74414 | -609.73832 | -609.73738 | -609.77693 |
| IV                                         | -609.81383 | .05013 | .05689 | .05783 | .01619  | -609.76370 | -609.75694 | -609.75600 | -609.79764 |
| HCN                                        | -93.33544  | .01649 | .01903 | .01997 | -.00287 | -93.31895  | -93.31641  | -93.31547  | -93.33831  |
| [UCH <sub>3</sub> ] <sup>+</sup>           | -516.42679 | .03203 | .03603 | .03698 | .00321  | -516.39477 | -516.39076 | -516.38981 | -516.42358 |
| [UCH <sub>3</sub> ] <sup>+</sup> + HCN (V) | -609.76223 | .04852 | .05506 | .05695 | .00034  | -609.71371 | -609.70717 | -609.70528 | -609.76189 |

Table 1.2.1: [UH]<sup>+</sup> + CH<sub>3</sub>CN PBE1PBE/SDD/6-311+g(d,p) Quintet Spin Structure Coordinates

| Structure          | Coordinates |           |           |           |
|--------------------|-------------|-----------|-----------|-----------|
| [UH] <sup>+</sup>  | U           | -0.282792 | 0.024095  | 0.017719  |
|                    | H           | -0.733284 | 1.219330  | 1.490648  |
| CH <sub>3</sub> CN | C           | -1.929495 | 0.984458  | -0.000024 |
|                    | C           | -3.379841 | 0.984488  | -0.000001 |
|                    | H           | -3.755309 | 1.465863  | 0.905510  |
|                    | H           | -3.755327 | 1.527855  | -0.869719 |
|                    | H           | -3.755344 | -0.040389 | -0.035786 |
|                    | N           | -0.777514 | 0.984461  | 0.000021  |
| II                 | U           | -0.557163 | -0.040143 | -0.025084 |
|                    | H           | -0.529416 | -0.827794 | 1.812523  |
|                    | C           | 1.969716  | 0.154018  | -0.010191 |
|                    | N           | 1.318616  | 1.165209  | 0.145250  |
|                    | C           | 3.304424  | -0.453020 | -0.048571 |
|                    | H           | 4.065530  | 0.315802  | 0.115554  |
|                    | H           | 3.378509  | -1.218170 | 0.728444  |
|                    | H           | 3.469204  | -0.939095 | -1.012997 |
| TSII→III           | U           | 0.073614  | -0.711486 | 0.307564  |
|                    | H           | -1.045984 | 0.615771  | 1.317784  |
|                    | C           | -0.120056 | 1.665676  | 0.210311  |
|                    | N           | -0.003628 | 1.069056  | -0.873754 |
|                    | C           | -0.310464 | 3.029708  | 0.726561  |
|                    | H           | -0.125403 | 3.093072  | 1.798167  |
|                    | H           | 0.354837  | 3.708754  | 0.186039  |
|                    | H           | -1.343120 | 3.337195  | 0.528643  |
| III                | U           | -0.672993 | -0.024170 | 0.000006  |
|                    | H           | 2.932951  | 1.602434  | 0.000180  |
|                    | C           | 2.601194  | 0.554909  | 0.000058  |
|                    | N           | 1.349033  | 0.313744  | -0.000157 |
|                    | C           | 3.670733  | -0.466768 | 0.000059  |
|                    | H           | 4.315071  | -0.311363 | -0.873965 |
|                    | H           | 4.316262  | -0.310510 | 0.873001  |

|                 |   |           |           |           |
|-----------------|---|-----------|-----------|-----------|
|                 | H | 3.276313  | -1.482020 | 0.000678  |
| <b>TSIII→IV</b> | U | 0.178550  | -0.814864 | 0.620037  |
|                 | H | 3.145200  | 1.031107  | -0.503672 |
|                 | C | 2.121924  | 1.034815  | -0.171120 |
|                 | N | 1.044491  | 1.339131  | 0.155275  |
|                 | C | 2.229931  | -1.620852 | 0.018838  |
|                 | H | 3.261709  | -1.552573 | -0.324761 |
|                 | H | 2.252683  | -2.147733 | 1.006427  |
|                 | H | 1.695769  | -2.296232 | -0.696678 |
| <b>IV</b>       | U | -0.178467 | -0.276721 | -0.014009 |
|                 | H | 2.878373  | 1.088313  | -1.104265 |
|                 | C | 2.092776  | 0.684504  | -0.464489 |
|                 | N | 1.859430  | 0.460182  | 0.701644  |
|                 | C | -1.270863 | 1.772641  | 0.028577  |
|                 | H | -0.925598 | 2.423084  | 0.845237  |
|                 | H | -1.122999 | 2.340518  | -0.903292 |
|                 | H | -2.358289 | 1.642279  | 0.155131  |
| HCN             | C | 0.000000  | 0.000000  | -0.497856 |
|                 | H | 0.000000  | 0.000000  | -1.566083 |
|                 | N | -0.000000 | -0.000000 | 0.650460  |

Table 1.3: [UH]<sup>+</sup> + CH<sub>3</sub>CN B3LYP/SDD/6-311+g(d,p) Triplet Spin Energies (Hartree)

| Structure                                  | EO         | E_ZPE  | E_tot  | H_corr | G_corr  | EO+E_ZPE   | EO+E_tot   | EO+H_corr  | EO+G_corr  |
|--------------------------------------------|------------|--------|--------|--------|---------|------------|------------|------------|------------|
| [UH] <sup>+</sup>                          | -132.79616 | .04515 | .04876 | .04970 | .02113  | -132.75101 | -132.74740 | -132.74646 | -132.77503 |
| CH <sub>3</sub> CN                         | -477.14828 | .00361 | .00597 | .00691 | -.01880 | -477.14467 | -477.14231 | -477.14136 | -477.16708 |
| [UH] <sup>+</sup> + CH <sub>3</sub> CN (I) | -609.94443 | .04875 | .05472 | .05661 | .00233  | -609.89569 | -609.88971 | -609.88782 | -609.94210 |
| <b>II</b>                                  | -610.07751 | .04957 | .05593 | .05688 | .01626  | -610.02794 | -610.02158 | -610.02063 | -610.06125 |
| <b>TSII→III</b>                            | -610.05730 | .05036 | .05551 | .05645 | .01876  | -610.00694 | -610.00179 | -610.00084 | -610.03854 |
| <b>III</b>                                 | -610.08969 | .05691 | .06237 | .06332 | .02462  | -610.03278 | -610.02731 | -610.02637 | -610.06507 |
| <b>TSIII→IV</b>                            | -610.04717 | .05177 | .05682 | .05777 | .02061  | -609.99540 | -609.99035 | -609.98940 | -610.02656 |
| <b>IV</b>                                  | -610.08235 | .04978 | .05652 | .05747 | .01634  | -610.03257 | -610.02582 | -610.02488 | -610.06601 |
| HCN                                        | -516.57310 | .03193 | .03590 | .03684 | .00362  | -516.54117 | -516.53720 | -516.53626 | -516.56948 |
| [UCH <sub>3</sub> ] <sup>+</sup>           | -93.45449  | .01636 | .01890 | .01985 | -.00300 | -93.43813  | -93.43559  | -93.43465  | -93.45749  |
| [UCH <sub>3</sub> ] <sup>+</sup> + HCN (V) | -610.02759 | .04829 | .05480 | .05669 | .00063  | -609.97930 | -609.97279 | -609.97090 | -610.02697 |

Table 1.3.1: [UH]<sup>+</sup> + CH<sub>3</sub>CN B3LYP/SDD/6-311+g(d,p) Triplet Spin Structure Coordinates

| Structure          | Coordinates |           |           |           |
|--------------------|-------------|-----------|-----------|-----------|
| [UH] <sup>+</sup>  | U           | -0.275143 | 0.003800  | -0.007291 |
|                    | H           | -0.722447 | 1.190578  | 1.455215  |
| CH <sub>3</sub> CN | C           | -1.924802 | 0.984461  | -0.000015 |
|                    | C           | -3.381457 | 0.984487  | -0.000000 |
|                    | H           | -3.758144 | 1.465575  | 0.904967  |
|                    | H           | -3.758156 | 1.527530  | -0.869198 |
|                    | H           | -3.758174 | -0.039776 | -0.035766 |
|                    | N           | -0.772097 | 0.984458  | 0.000013  |
| <b>II</b>          | U           | 0.225312  | -0.439592 | -0.150674 |
|                    | H           | 0.908112  | -0.694200 | 1.700005  |
|                    | C           | -0.502999 | 1.818698  | 0.242628  |

|                               |   |           |           |           |
|-------------------------------|---|-----------|-----------|-----------|
|                               | N | -1.361116 | 0.915792  | 0.220397  |
|                               | C | -0.469980 | 3.276482  | 0.496148  |
|                               | H | -1.475502 | 3.671105  | 0.659929  |
|                               | H | 0.150996  | 3.468968  | 1.376256  |
|                               | H | 0.004979  | 3.790499  | -0.343375 |
| TSII→III                      | U | -0.217406 | -0.603487 | -0.119396 |
|                               | H | 0.050210  | 0.772933  | 1.349212  |
|                               | C | -0.512080 | 1.653392  | 0.134087  |
|                               | N | -1.475018 | 0.980181  | -0.405200 |
|                               | C | -0.356478 | 3.083929  | 0.490840  |
|                               | H | -1.144190 | 3.384491  | 1.189674  |
|                               | H | 0.617707  | 3.294870  | 0.930224  |
|                               | H | -0.480905 | 3.678323  | -0.419237 |
| III                           | U | 1.164608  | -0.927065 | -0.839965 |
|                               | H | 0.864224  | 2.005588  | 1.830746  |
|                               | C | 0.116093  | 1.498091  | 1.207679  |
|                               | N | 0.504749  | 0.565772  | 0.424519  |
|                               | C | -1.285545 | 1.971340  | 1.359751  |
|                               | H | -1.588167 | 1.867142  | 2.408695  |
|                               | H | -1.328244 | 3.045687  | 1.144090  |
|                               | H | -1.978169 | 1.432261  | 0.715423  |
| TSIII→IV                      | U | -0.114660 | 0.621154  | -0.715655 |
|                               | H | 0.924324  | 1.885626  | 2.166109  |
|                               | C | 0.622061  | 1.334762  | 1.282894  |
|                               | N | 0.907247  | 0.099620  | 0.944759  |
|                               | C | -1.271835 | 1.773055  | 1.060366  |
|                               | H | -2.007749 | 0.934829  | 1.005822  |
|                               | H | -1.356593 | 2.172627  | 2.068300  |
|                               | H | -1.548743 | 2.586641  | 0.364213  |
| IV                            | U | -0.117690 | -0.280543 | -0.016037 |
|                               | H | 2.682908  | 1.432992  | -0.955026 |
|                               | C | 1.863306  | 0.885265  | -0.484768 |
|                               | N | 1.667919  | 0.595514  | 0.714846  |
|                               | C | -1.549162 | 1.550665  | 0.035918  |
|                               | H | -1.534517 | 2.076844  | 1.000744  |
|                               | H | -1.295110 | 2.293356  | -0.733710 |
|                               | H | -2.586138 | 1.222545  | -0.147470 |
| UCH <sub>3</sub> <sup>+</sup> | U | -3.286944 | 1.029979  | -0.450263 |
|                               | C | -1.045147 | 0.778165  | -0.038280 |
|                               | H | -0.444776 | 1.483636  | -0.634961 |
|                               | H | -0.808810 | 0.957534  | 1.022921  |
|                               | H | -0.702923 | -0.239524 | -0.286102 |
| HCN                           | C | 0.000000  | 0.000000  | -0.498334 |
|                               | H | 0.000000  | 0.000000  | -1.564845 |
|                               | N | -0.000000 | 0.000000  | 0.650693  |

Table 1.4: [UH]<sup>+</sup> + CH<sub>3</sub>CN PBE1PBE/SDD/6-311+g(d,p) Triplet Spin Energies (Hartrees)

| Structure                                  | E0         | E_ZPE  | E_tot  | H_corr | G_corr  | E0+E_ZPE   | E0+E_tot   | E0+H_corr  | E0+G_corr  |
|--------------------------------------------|------------|--------|--------|--------|---------|------------|------------|------------|------------|
| [UH] <sup>+</sup>                          | -477.06589 | .00353 | .00589 | .00684 | -.01891 | -477.06236 | -477.06000 | -477.05905 | -477.08480 |
| CH <sub>3</sub> CN                         | -132.62746 | .04543 | .04903 | .04997 | .02143  | -132.58203 | -132.57844 | -132.57749 | -132.60603 |
| [UH] <sup>+</sup> + CH <sub>3</sub> CN (I) | -609.69335 | .04896 | .05492 | .05681 | .00252  | -609.64439 | -609.63843 | -609.63654 | -609.69083 |
| II                                         | -609.81324 | .04986 | .05621 | .05715 | .01654  | -609.76338 | -609.75703 | -609.75608 | -609.79670 |
| TSII→III                                   | -609.80021 | .05071 | .05585 | .05679 | .01914  | -609.74950 | -609.74436 | -609.74342 | -609.78107 |
| III                                        | -609.82240 | .05726 | .06272 | .06367 | .02497  | -609.76514 | -609.75968 | -609.75873 | -609.79743 |

|                                            |            |        |        |        |         |            |            |            |            |
|--------------------------------------------|------------|--------|--------|--------|---------|------------|------------|------------|------------|
| TSIII→IV                                   | -609.79056 | .05182 | .05693 | .05787 | .02059  | -609.73874 | -609.73363 | -609.73269 | -609.76997 |
| IV                                         | -609.81882 | .05031 | .05694 | .05789 | .01706  | -609.76851 | -609.76188 | -609.76093 | -609.80176 |
| HCN                                        | -93.33544  | .01649 | .01903 | .01997 | -.00287 | -93.31895  | -93.31641  | -93.31547  | -93.33831  |
| [UCH <sub>3</sub> ] <sup>+</sup>           | -516.41461 | .03195 | .03599 | .03694 | .00357  | -516.38266 | -516.37862 | -516.37767 | -516.41104 |
| [UCH <sub>3</sub> ] <sup>+</sup> + HCN (V) | -609.75005 | .04844 | .05502 | .05691 | .00070  | -609.70161 | -609.69503 | -609.69314 | -609.74935 |

Table 1.4.1: [UH]<sup>+</sup> + CH<sub>3</sub>CN PBE1PBE/SDD/6-311+g(d,p) Triplet Spin Structure Coordinates

| Structure          | Coordinates |           |           |           |
|--------------------|-------------|-----------|-----------|-----------|
| [UH] <sup>+</sup>  | U           | -0.280565 | 0.018185  | 0.010435  |
|                    | H           | -0.735512 | 1.225240  | 1.497931  |
| CH <sub>3</sub> CN | C           | -1.929495 | 0.984458  | -0.000024 |
|                    | C           | -3.379841 | 0.984488  | -0.000001 |
|                    | H           | -3.755309 | 1.465863  | 0.905510  |
|                    | H           | -3.755327 | 1.527855  | -0.869719 |
|                    | H           | -3.755344 | -0.040389 | -0.035786 |
|                    | N           | -0.777514 | 0.984461  | 0.000021  |
| II                 | U           | 0.167912  | -0.396152 | -0.155275 |
|                    | H           | 0.940615  | -0.581615 | 1.649012  |
|                    | C           | -0.490639 | 1.795328  | 0.241322  |
|                    | N           | -1.382393 | 0.909725  | 0.263767  |
|                    | C           | -0.463862 | 3.245275  | 0.492794  |
|                    | H           | -1.471183 | 3.653287  | 0.603240  |
|                    | H           | 0.104972  | 3.420825  | 1.412889  |
|                    | H           | 0.074381  | 3.761078  | -0.306434 |
| TSII→III           | U           | -0.209963 | -0.552652 | -0.125537 |
|                    | H           | 0.058224  | 0.741731  | 1.373162  |
|                    | C           | -0.510912 | 1.654662  | 0.128356  |
|                    | N           | -1.490398 | 0.987307  | -0.390255 |
|                    | C           | -0.355797 | 3.076736  | 0.485289  |
|                    | H           | -1.150669 | 3.378227  | 1.175728  |
|                    | H           | 0.616035  | 3.288298  | 0.930340  |
|                    | H           | -0.474678 | 3.670322  | -0.426878 |
| III                | U           | 1.152187  | -0.911275 | -0.827607 |
|                    | H           | 0.863860  | 2.004442  | 1.829740  |
|                    | C           | 0.113257  | 1.498282  | 1.207243  |
|                    | N           | 0.500845  | 0.567625  | 0.425133  |
|                    | C           | -1.281113 | 1.966719  | 1.356369  |
|                    | H           | -1.583019 | 1.864365  | 2.406058  |
|                    | H           | -1.323398 | 3.041819  | 1.142556  |
|                    | H           | -1.973070 | 1.426839  | 0.711446  |
| TSIII→IV           | U           | -0.095780 | 0.648738  | -0.668309 |
|                    | H           | 0.935875  | 1.886363  | 2.154303  |
|                    | C           | 0.638928  | 1.350686  | 1.257885  |
|                    | N           | 0.871206  | 0.081607  | 0.964249  |
|                    | C           | -1.273649 | 1.767218  | 1.042754  |
|                    | H           | -2.015489 | 0.931252  | 0.996502  |
|                    | H           | -1.332131 | 2.150120  | 2.060914  |
|                    | H           | -1.574908 | 2.592329  | 0.368509  |
| IV                 | U           | -0.107451 | -0.278783 | -0.015076 |
|                    | H           | 2.611368  | 1.436597  | -0.953193 |
|                    | C           | 1.786954  | 0.882545  | -0.497712 |
|                    | N           | 1.601634  | 0.628989  | 0.723050  |
|                    | C           | -1.544274 | 1.506944  | 0.029914  |
|                    | H           | -1.532195 | 2.044660  | 0.989124  |

|                               |   |           |           |           |
|-------------------------------|---|-----------|-----------|-----------|
|                               | H | -1.279171 | 2.242980  | -0.744602 |
|                               | H | -2.581985 | 1.183938  | -0.158882 |
| UCH <sub>3</sub> <sup>+</sup> | U | -3.269914 | 1.028067  | -0.447124 |
|                               | C | -1.051626 | 0.778898  | -0.039478 |
|                               | H | -0.448351 | 1.483802  | -0.635412 |
|                               | H | -0.812296 | 0.957855  | 1.021974  |
|                               | H | -0.706412 | -0.238832 | -0.286646 |
| HCN                           | C | 0.000000  | 0.000000  | -0.497856 |
|                               | H | 0.000000  | 0.000000  | -1.566083 |
|                               | N | -0.000000 | -0.000000 | 0.650460  |

Table 1.5: [UH]<sup>+</sup> + CH<sub>3</sub>CN B3LYP/SDD/6-311+g(d,p) Singlet Spin Energies (Hartrees)

| Structure                                  | EO         | E_ZPE  | E_tot  | H_corr | G_corr  | EO+E_ZPE   | EO+E_tot   | EO+H_corr  | EO+G_corr  |
|--------------------------------------------|------------|--------|--------|--------|---------|------------|------------|------------|------------|
| [UH] <sup>+</sup>                          | -516.49451 | .03174 | .03581 | .03675 | .00439  | -516.46277 | -516.45871 | -516.45776 | -516.49012 |
| CH <sub>3</sub> CN                         | -76.45846  | .02129 | .02413 | .02507 | .00299  | -76.43718  | -76.43434  | -76.43340  | -76.45547  |
| [UH] <sup>+</sup> + CH <sub>3</sub> CN (I) | -592.95297 | .05303 | .05993 | .06182 | .00738  | -592.89995 | -592.89305 | -592.89116 | -592.94559 |
| II                                         | -593.00750 | .05582 | .06312 | .06406 | .02281  | -592.95168 | -592.94438 | -592.94344 | -592.98469 |
| TSII→III                                   | -592.98456 | .04976 | .05610 | .05704 | .01849  | -592.93480 | -592.92847 | -592.92752 | -592.96608 |
| III                                        | -593.07282 | .05071 | .05725 | .05819 | .01953  | -593.02211 | -593.01558 | -593.01463 | -593.05329 |
| TSIII→IV                                   | -593.03595 | .05113 | .05660 | .05755 | .02081  | -592.98482 | -592.97934 | -592.97840 | -593.01514 |
| IV                                         | -593.05982 | .05830 | .06443 | .06537 | .02677  | -593.00152 | -592.99539 | -592.99445 | -593.03305 |
| HCN                                        | -40.53393  | .04455 | .04742 | .04836 | .02488  | -40.48938  | -40.48651  | -40.48557  | -40.50904  |
| [UCH <sub>3</sub> ] <sup>+</sup>           | -552.50789 | .01148 | .01463 | .01557 | -.00833 | -552.49641 | -552.49326 | -552.49232 | -552.51622 |
| [UCH <sub>3</sub> ] <sup>+</sup> + HCN (V) | -593.04182 | .05603 | .06204 | .06393 | .01656  | -592.98579 | -592.97977 | -592.97789 | -593.02526 |

Table 1.5.1: [UH]<sup>+</sup> + CH<sub>3</sub>CN B3LYP/SDD/6-311+g(d,p) Singlet Spin Structure Coordinates

| Structure          | Coordinates |           |           |           |
|--------------------|-------------|-----------|-----------|-----------|
| [UH] <sup>+</sup>  | U           | -0.274048 | 0.000897  | -0.010869 |
|                    | H           | -0.723542 | 1.193481  | 1.458793  |
| CH <sub>3</sub> CN | C           | -1.924802 | 0.984461  | -0.000015 |
|                    | C           | -3.381457 | 0.984487  | -0.000000 |
|                    | H           | -3.758144 | 1.465575  | 0.904967  |
|                    | H           | -3.758156 | 1.527530  | -0.869198 |
|                    | H           | -3.758174 | -0.039776 | -0.035766 |
|                    | N           | -0.772097 | 0.984458  | 0.000013  |
| II                 | U           | -0.514404 | -0.038849 | -0.025579 |
|                    | H           | -0.632029 | -0.697917 | 1.821330  |
|                    | C           | 1.737010  | -0.013448 | -0.037414 |
|                    | N           | 1.118160  | 1.100545  | 0.139786  |
|                    | C           | 3.179968  | -0.336233 | -0.031305 |
|                    | H           | 3.799725  | 0.562339  | -0.054964 |
|                    | H           | 3.398190  | -0.898169 | 0.884808  |
|                    | H           | 3.430264  | -0.997854 | -0.864126 |
| TSII→III           | U           | 0.217858  | -0.450641 | -0.166068 |
|                    | H           | 0.212338  | 0.702370  | 1.457191  |

|                               |   |           |           |           |
|-------------------------------|---|-----------|-----------|-----------|
|                               | C | -0.234443 | 1.590323  | 0.264081  |
|                               | N | -1.189445 | 0.838772  | -0.357769 |
|                               | C | -0.350661 | 3.006808  | 0.685841  |
|                               | H | -1.243481 | 3.157972  | 1.300017  |
|                               | H | 0.532108  | 3.341096  | 1.231012  |
|                               | H | -0.464478 | 3.621046  | -0.212990 |
| III                           | U | -0.664649 | -0.024450 | 0.004426  |
|                               | H | 2.874182  | 1.597800  | 0.161980  |
|                               | C | 2.562991  | 0.554811  | 0.026436  |
|                               | N | 1.313227  | 0.309175  | -0.123752 |
|                               | C | 3.644428  | -0.460899 | 0.015226  |
|                               | H | 4.361709  | -0.205827 | -0.774988 |
|                               | H | 4.207819  | -0.399177 | 0.954278  |
|                               | H | 3.266860  | -1.471054 | -0.132210 |
| TSIII→IV                      | U | -0.044710 | 0.635199  | -0.654928 |
|                               | H | 0.947623  | 1.889528  | 2.137971  |
|                               | C | 0.629301  | 1.386468  | 1.232694  |
|                               | N | 0.819796  | 0.060014  | 0.975540  |
|                               | C | -1.277601 | 1.776232  | 1.046108  |
|                               | H | -1.984782 | 0.912270  | 1.000247  |
|                               | H | -1.344419 | 2.153645  | 2.064554  |
|                               | H | -1.591155 | 2.594958  | 0.374620  |
| IV                            | U | -0.092302 | -0.280093 | -0.016333 |
|                               | H | 2.523504  | 1.537060  | -0.922094 |
|                               | C | 1.714152  | 0.938638  | -0.502432 |
|                               | N | 1.535746  | 0.649069  | 0.733016  |
|                               | C | -1.589521 | 1.461690  | 0.036342  |
|                               | H | -1.518087 | 2.061663  | 0.953300  |
|                               | H | -1.391196 | 2.140198  | -0.807426 |
|                               | H | -2.620468 | 1.084220  | -0.055750 |
| UCH <sub>3</sub> <sup>+</sup> | U | -3.253294 | 1.047442  | -0.437384 |
|                               | C | -1.044015 | 0.762871  | -0.042847 |
|                               | H | -0.472086 | 1.487361  | -0.644763 |
|                               | H | -0.837913 | 0.958493  | 1.021838  |
|                               | H | -0.681292 | -0.246377 | -0.283530 |
| HCN                           | C | 0.000000  | 0.000000  | -0.498334 |
|                               | H | 0.000000  | 0.000000  | -1.564845 |
|                               | N | -0.000000 | 0.000000  | 0.650693  |

Table 1.6: [UH]<sup>+</sup> + CH<sub>3</sub>CN PBE1PBE/SDD/6-311+g(d,p) Singlet Spin Energies (Hartrees)

| Structure                                  | E0         | E_ZPE  | E_tot  | H_corr | G_corr  | E0+E_ZPE   | E0+E_tot   | E0+H_corr  | E0+G_corr  |
|--------------------------------------------|------------|--------|--------|--------|---------|------------|------------|------------|------------|
| [UH] <sup>+</sup>                          | -516.32691 | .03153 | .03580 | .03674 | .00387  | -516.29538 | -516.29111 | -516.29017 | -516.32304 |
| CH <sub>3</sub> CN                         | -76.37202  | .02160 | .02444 | .02538 | .00331  | -76.35042  | -76.34758  | -76.34664  | -76.36871  |
| [UH] <sup>+</sup> + CH <sub>3</sub> CN (I) | -592.69893 | .05313 | .06024 | .06212 | .00718  | -592.64580 | -592.63870 | -592.63681 | -592.69175 |
| II                                         | -592.75618 | .05599 | .06341 | .06435 | .02286  | -592.70019 | -592.69278 | -592.69183 | -592.73332 |
| TSII→III                                   | -592.73709 | .05027 | .05662 | .05757 | .01902  | -592.68683 | -592.68047 | -592.67952 | -592.71807 |
| III                                        | -592.82919 | .05112 | .05760 | .05854 | .02013  | -592.77807 | -592.77159 | -592.77065 | -592.80906 |
| TSIII→IV                                   | -592.79286 | .05154 | .05690 | .05785 | .02137  | -592.74132 | -592.73596 | -592.73501 | -592.77150 |
| IV                                         | -592.80953 | .05847 | .06434 | .06528 | .02737  | -592.75106 | -592.74519 | -592.74424 | -592.78216 |
| HCN                                        | -552.31752 | .01154 | .01470 | .01564 | -.01097 | -552.30598 | -552.30282 | -552.30188 | -552.32849 |
| [UCH <sub>3</sub> ] <sup>+</sup>           | -40.47076  | .04475 | .04762 | .04856 | .02508  | -40.42601  | -40.42314  | -40.42219  | -40.44567  |
| [UCH <sub>3</sub> ] <sup>+</sup> + HCN (V) | -592.78828 | .05629 | .06232 | .06421 | .01412  | -592.73199 | -592.72596 | -592.72407 | -592.77416 |

Table 1.6.1: [UH]<sup>+</sup> + CH<sub>3</sub>CN PBE1PBE/SDD/6-311+g(d,p) Singlet Spin Structure Coordinates

| Structure                     | Coordinates |           |           |           |
|-------------------------------|-------------|-----------|-----------|-----------|
| [UH] <sup>+</sup>             | U           | -0.274832 | 0.002976  | -0.008307 |
|                               | H           | -0.722758 | 1.191402  | 1.456231  |
| CH <sub>3</sub> CN            | C           | -1.929495 | 0.984458  | -0.000024 |
|                               | C           | -3.379841 | 0.984488  | -0.000001 |
|                               | H           | -3.755309 | 1.465863  | 0.905510  |
|                               | H           | -3.755327 | 1.527855  | -0.869719 |
|                               | H           | -3.755344 | -0.040389 | -0.035786 |
|                               | N           | -0.777514 | 0.984461  | 0.000021  |
| II                            | U           | -0.505820 | -0.038360 | -0.025164 |
|                               | H           | -0.541070 | -0.787240 | 1.777197  |
|                               | C           | 1.695170  | -0.020889 | -0.044714 |
|                               | N           | 1.088284  | 1.104482  | 0.153655  |
|                               | C           | 3.132564  | -0.332788 | -0.041180 |
|                               | H           | 3.742856  | 0.556873  | -0.212751 |
|                               | H           | 3.376082  | -0.732851 | 0.951953  |
|                               | H           | 3.373215  | -1.116968 | -0.761522 |
| TSII→III                      | U           | 0.209531  | -0.414354 | -0.158848 |
|                               | H           | 0.222901  | 0.677667  | 1.470104  |
|                               | C           | -0.228711 | 1.593967  | 0.259240  |
|                               | N           | -1.194417 | 0.846052  | -0.353381 |
|                               | C           | -0.349846 | 3.001569  | 0.681710  |
|                               | H           | -1.247195 | 3.148448  | 1.290551  |
|                               | H           | 0.530588  | 3.338450  | 1.229690  |
|                               | H           | -0.463056 | 3.615948  | -0.217752 |
| III                           | U           | -0.654393 | -0.025611 | 0.007019  |
|                               | H           | 2.833591  | 1.584399  | 0.270785  |
|                               | C           | 2.526544  | 0.555870  | 0.045716  |
|                               | N           | 1.285581  | 0.336593  | -0.197415 |
|                               | C           | 3.590790  | -0.467911 | 0.021447  |
|                               | H           | 4.357676  | -0.163154 | -0.702047 |
|                               | H           | 4.098142  | -0.491315 | 0.993616  |
|                               | H           | 3.211708  | -1.457652 | -0.229150 |
| TSIII→IV                      | U           | -0.018503 | 0.636447  | -0.616278 |
|                               | H           | 0.956860  | 1.895544  | 2.126850  |
|                               | C           | 0.643573  | 1.402142  | 1.212050  |
|                               | N           | 0.748516  | 0.045775  | 1.016922  |
|                               | C           | -1.266448 | 1.792608  | 1.013648  |
|                               | H           | -1.948670 | 0.905296  | 0.960134  |
|                               | H           | -1.308791 | 2.104187  | 2.057644  |
|                               | H           | -1.652484 | 2.626314  | 0.405837  |
| IV                            | U           | -0.088522 | -0.279036 | -0.016306 |
|                               | H           | 2.463081  | 1.548610  | -0.927319 |
|                               | C           | 1.661531  | 0.938539  | -0.507784 |
|                               | N           | 1.504495  | 0.651397  | 0.736408  |
|                               | C           | -1.564385 | 1.444612  | 0.039366  |
|                               | H           | -1.472617 | 2.064772  | 0.941924  |
|                               | H           | -1.355089 | 2.105325  | -0.818196 |
|                               | H           | -2.605687 | 1.093905  | -0.040629 |
| UCH <sub>3</sub> <sup>+</sup> | U           | -3.229849 | 1.070378  | -0.424760 |
|                               | C           | -1.051291 | 0.744150  | -0.050543 |
|                               | H           | -0.496983 | 1.487813  | -0.650181 |
|                               | H           | -0.863313 | 0.958928  | 1.016452  |

|     |   |           |           |           |
|-----|---|-----------|-----------|-----------|
|     | H | -0.647163 | -0.251479 | -0.277653 |
| HCN | C | 0.000000  | 0.000000  | -0.497856 |
|     | H | 0.000000  | 0.000000  | -1.566083 |
|     | N | -0.000000 | -0.000000 | 0.650460  |

Table 1.7.1:  $[\text{UH}]^+ + \text{CH}_3\text{CN}$  B3LYP/SDD/6-311+g(d,p) Quintet Spin Relative Energies (kJ/mol)

| Structure              | E0+E_ZPE | E0+E_tot | E0+H_corr | E0+G_corr |
|------------------------|----------|----------|-----------|-----------|
| Reactants (I)          | 0        | 0        | 0         | 0         |
| II                     | -206.981 | -205.934 | -208.412  | -172.501  |
| TSII $\rightarrow$ III | -165.259 | -166.879 | -169.361  | -127.416  |
| III                    | -303.369 | -304.708 | -307.189  | -266.192  |
| TSIII $\rightarrow$ IV | -191.042 | -188.973 | -191.451  | -158.368  |
| IV                     | -211.584 | -209.434 | -211.915  | -177.657  |
| Products (V)           | -107.903 | -106.598 | -106.601  | -111.004  |

Table 1.7.2:  $[\text{UH}]^+ + \text{CH}_3\text{CN}$  PBE1PBE/SDD/6-311+g(d,p) Quintet Spin Relative Energies (kJ/mol)

| Structure              | E0+E_ZPE | E0+E_tot | E0+H_corr | E0+G_corr |
|------------------------|----------|----------|-----------|-----------|
| Reactants (I)          | 0        | 0        | 0         | 0         |
| II                     | -163.991 | -163.083 | -165.561  | -129.416  |
| TSII $\rightarrow$ III | -138.482 | -140.322 | -142.801  | -100.507  |
| III                    | -258.68  | -259.988 | -262.466  | -221.555  |
| TSIII $\rightarrow$ IV | -117.609 | -117.969 | -120.447  | -80.5661  |
| IV                     | -168.967 | -166.856 | -169.334  | -134.932  |
| Products (V)           | -37.7153 | -36.1873 | -36.1873  | -41.0628  |

Table 1.7.3:  $[\text{UH}]^+ + \text{CH}_3\text{CN}$  B3LYP/SDD/6-311+g(d,p) Triplet Spin Relative Energies (kJ/mol)

| Structure              | E0+E_ZPE | E0+E_tot | E0+H_corr | E0+G_corr |
|------------------------|----------|----------|-----------|-----------|
| Reactants (I)          | 137.1036 | 137.1062 | 137.1036  | 138.4216  |
| II                     | -210.127 | -209.113 | -211.592  | -174.391  |
| TSII $\rightarrow$ III | -154.994 | -157.155 | -159.636  | -114.779  |
| III                    | -222.842 | -224.173 | -226.654  | -184.428  |
| TSIII $\rightarrow$ IV | -124.696 | -127.114 | -129.592  | -83.3255  |
| IV                     | -222.277 | -220.258 | -222.74   | -186.888  |
| Products (V)           | -82.4381 | -81.0256 | -81.0282  | -84.3888  |

Table 1.7.4: [UH]<sup>+</sup> + CH<sub>3</sub>CN PBE1PBE/SDD/6-311+g(d,p) Triplet Spin Relative Energies (kJ/mol)

| Structure     | E0+E_ZPE | E0+E_tot | E0+H_cor<br>r | E0+G_cor<br>r |
|---------------|----------|----------|---------------|---------------|
| Reactants (I) | 144.2844 | 144.2896 | 144.2896      | 145.5         |
| II            | -168.116 | -167.084 | -169.563      | -132.467      |
| TSII → III    | -131.679 | -133.835 | -136.313      | -91.4357      |
| III           | -172.742 | -174.039 | -176.518      | -134.381      |
| TSIII → IV    | -103.434 | -105.661 | -108.139      | -62.2795      |
| IV            | -181.58  | -179.818 | -182.296      | -145.757      |
| Products (V)  | -5.93888 | -4.3137  | -4.3137       | -8.14168      |

Table 1.7.5: [UH]<sup>+</sup> + CH<sub>3</sub>CN B3LYP/SDD/6-311+g(d,p) Singlet Spin Relative Energies (kJ/mol)

| Structure     | E0+E_ZPE | E0+E_tot | E0+H_cor<br>r | E0+G_cor<br>r |
|---------------|----------|----------|---------------|---------------|
| Reactants (I) | 165.1177 | 165.1203 | 165.1177      | 169.1373      |
| II            | -88.0383 | -87.8492 | -90.3303      | -48.8474      |
| TSII → III    | -32.1309 | -34.9375 | -37.4186      | 11.83838      |
| III           | -74.3909 | -75.4201 | -77.9012      | -34.2759      |
| TSIII → IV    | -80.2878 | -83.4489 | -9.41242      | -35.2552      |
| IV            | -109.956 | -108.882 | -111.363      | -70.177       |
| Products (V)  | 123.409  | 125.0631 | 125.0605      | 123.9577      |

Table 1.7.6: [UH]<sup>+</sup> + CH<sub>3</sub>CN B3LYP/SDD/6-311+g(d,p) Singlet Spin Relative Energies (kJ/mol)

| Structure     | E0+E_ZPE | E0+E_tot | E0+H_cor<br>r | E0+G_cor<br>r |
|---------------|----------|----------|---------------|---------------|
| Reactants (I) | 267.1394 | 267.1394 | 267.1394      | 271.1564      |
| II            | -42.8272 | -42.6565 | -45.135       | -3.24774      |
| TSII → III    | -5.74985 | -8.6484  | -11.1269      | 38.31918      |
| III           | -4.17192 | -5.35865 | -7.83712      | 36.57322      |
| TSIII → IV    | 22.58718 | 19.34994 | 16.87146      | 67.7064       |
| IV            | -65.8265 | -64.7737 | -67.2522      | -25.9242      |
| Products (V)  | 223.2227 | 225.4333 | 225.4333      | 222.8997      |

Figure 3:  $[\text{UH}]^+ + \text{CH}_3\text{CN}$  B3LYP/SDD/6-311+g(d,p) Relative Enthalpy (kJ/mol)

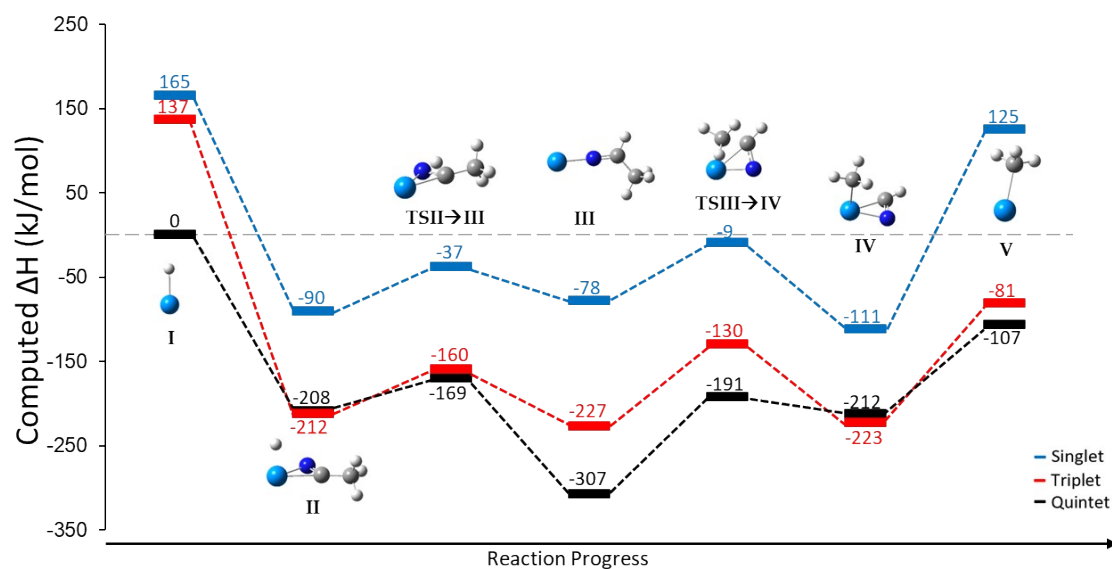

Figure 3.1:  $[\text{UH}]^+ + \text{CH}_3\text{CN}$  PBE1PBE/SDD/6-311+g(d,p) Relative Enthalpy (kJ/mol)

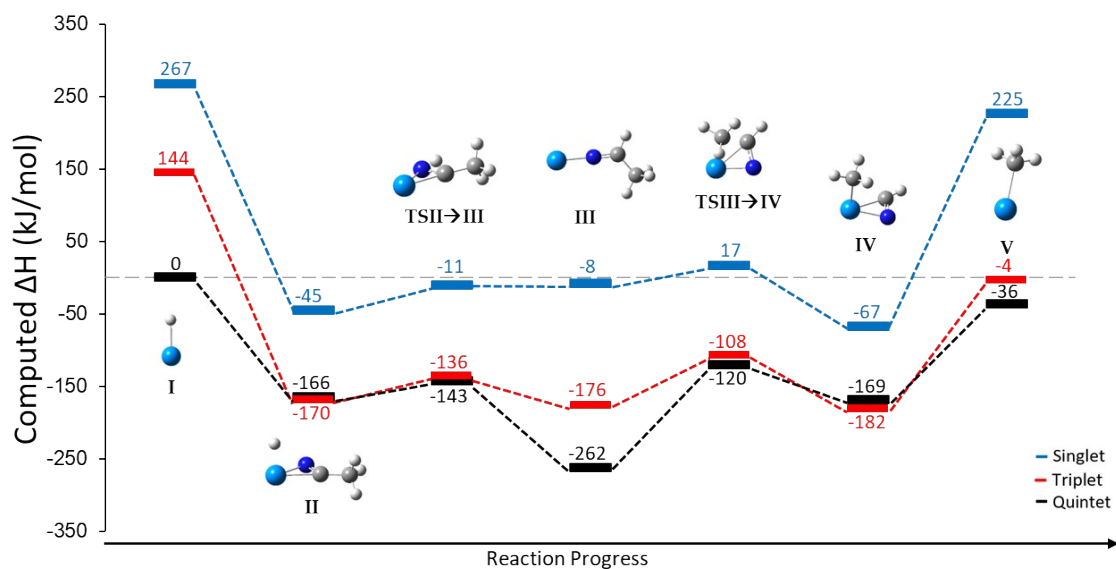

Table 2.1:  $[\text{UCH}_3]^+ + \text{H}_2\text{O}$  B3LYP/SDD/6-311+g(d,p) Quintet Spin Energies (Hartree)

| Structure                                   | E0         | E_ZPE  | E_tot  | H_corr | G_corr  | E0+E_ZPE   | E0+E_tot   | E0+H_corr  | E0+G_corr  |
|---------------------------------------------|------------|--------|--------|--------|---------|------------|------------|------------|------------|
| $[\text{UCH}_3]^+$                          | -516.58290 | .03202 | .03595 | .03690 | .00328  | -516.55087 | -516.54694 | -516.54600 | -516.57961 |
| $\text{H}_2\text{O}$                        | -76.45846  | .02129 | .02413 | .02507 | .00299  | -76.43718  | -76.43434  | -76.43340  | -76.45547  |
| $[\text{UCH}_3]^+ + \text{H}_2\text{O}$ (I) | -593.04136 | .05331 | .06008 | .06197 | .00628  | -592.98805 | -592.98128 | -592.97939 | -593.03508 |
| II                                          | -593.08696 | .05609 | .06337 | .06431 | .02116  | -593.03087 | -593.02359 | -593.02265 | -593.06580 |
| TSII→III                                    | -593.04514 | .04859 | .05496 | .05590 | .01570  | -592.99655 | -592.99018 | -592.98924 | -593.02944 |
| III                                         | -593.07478 | .04944 | .05685 | .05780 | .01474  | -593.02534 | -593.01793 | -593.01699 | -593.06004 |
| TSIII→IV                                    | -593.07363 | .04970 | .05609 | .05704 | .01638  | -593.02393 | -593.01754 | -593.01660 | -593.05726 |
| IV                                          | -593.14012 | .05774 | .06479 | .06574 | .02198  | -593.08239 | -593.07533 | -593.07439 | -593.11815 |
| $[\text{UOH}]^+$                            | -552.59856 | .01139 | .01459 | .01553 | -.01207 | -552.58717 | -552.58397 | -552.58303 | -552.61063 |
| $\text{CH}_4$                               | -40.53393  | .04455 | .04742 | .04836 | .02488  | -40.48938  | -40.48651  | -40.48557  | -40.50904  |
| $[\text{UOH}]^+ + \text{CH}_4$ (V)          | -593.13249 | .05593 | .06200 | .06389 | .01282  | -593.07655 | -593.07048 | -593.06859 | -593.11967 |

Table 2.1.1:  $[\text{UCH}_3]^+ + \text{H}_2\text{O}$  B3LYP/SDD/6-311+g(d,p) Quintet Spin Structure Coordinates

| Structure            | Coordinates |           |           |           |
|----------------------|-------------|-----------|-----------|-----------|
| $[\text{UCH}_3]^+$   | U           | -3.289712 | 1.030298  | -0.450766 |
|                      | C           | -1.044265 | 0.778059  | -0.038123 |
|                      | H           | -0.444203 | 1.483373  | -0.634672 |
|                      | H           | -0.808150 | 0.957408  | 1.022779  |
|                      | H           | -0.702269 | -0.239348 | -0.285902 |
| $\text{H}_2\text{O}$ | O           | -1.313436 | -0.308152 | 0.000000  |
|                      | H           | -1.631916 | -1.215829 | 0.000000  |
|                      | H           | -0.354171 | -0.379700 | 0.000000  |
| II                   | U           | -3.338670 | 0.774412  | -0.166271 |
|                      | C           | -1.011103 | 0.734771  | -0.057839 |
|                      | H           | -0.500447 | 1.335336  | -0.823166 |
|                      | H           | -0.655571 | 1.079786  | 0.925727  |
|                      | H           | -0.666353 | -0.305611 | -0.183147 |
|                      | O           | -3.865348 | 3.016401  | -1.114914 |
|                      | H           | -4.347517 | 3.214983  | -1.933403 |
|                      | H           | -3.549174 | 3.863861  | -0.764044 |
| TSII→III             | U           | -3.434974 | 0.781127  | -0.527464 |
|                      | C           | -1.106975 | 0.900606  | -0.231472 |
|                      | H           | -0.561561 | 0.912178  | -1.186444 |
|                      | H           | -0.750778 | 0.024430  | 0.334049  |
|                      | H           | -0.795429 | 1.795903  | 0.323571  |
|                      | O           | -3.699246 | 2.770124  | -1.309664 |
|                      | H           | -3.680951 | 3.683451  | -1.626090 |
|                      | H           | -3.904270 | 2.846120  | 0.106454  |
| III                  | U           | -2.927481 | 2.276272  | 0.486089  |
|                      | C           | -0.932131 | 0.361536  | -0.212394 |
|                      | H           | -0.446007 | 1.108368  | -0.835804 |
|                      | H           | -0.476015 | 0.104332  | 0.739072  |
|                      | H           | -1.613130 | -0.347365 | -0.676506 |
|                      | O           | -3.850615 | 2.189566  | -1.305999 |
|                      | H           | -4.232687 | 2.229301  | -2.190792 |
|                      | H           | -1.525572 | 3.613698  | -0.079000 |
| TSIII→IV             | U           | -3.172978 | 1.982015  | 0.496788  |
|                      | C           | -0.916116 | 0.589719  | -0.242155 |
|                      | H           | -0.500928 | 1.066811  | -1.120710 |

|                    |   |           |           |           |
|--------------------|---|-----------|-----------|-----------|
|                    | H | -0.307215 | 0.595550  | 0.656462  |
|                    | H | -1.564634 | -0.275221 | -0.411147 |
|                    | O | -3.910521 | 2.202301  | -1.369116 |
|                    | H | -4.187955 | 2.356848  | -2.279968 |
|                    | H | -1.443290 | 3.017684  | 0.194514  |
| IV                 | U | -3.731002 | 1.664271  | -0.427065 |
|                    | C | -0.708604 | 1.102026  | -0.195553 |
|                    | H | 0.374311  | 0.982645  | -0.140127 |
|                    | H | -1.060959 | 1.335693  | 0.816577  |
|                    | H | -1.125015 | 0.156879  | -0.561760 |
|                    | O | -5.076850 | 2.956667  | -1.175199 |
|                    | H | -5.710450 | 3.587604  | -1.539551 |
|                    | H | -0.895612 | 1.928156  | -0.894381 |
| CH <sub>4</sub>    | C | -1.155386 | -0.323437 | 0.000000  |
|                    | H | -0.791856 | -1.351694 | -0.000000 |
|                    | H | -0.791837 | 0.190685  | 0.890494  |
|                    | H | -0.791837 | 0.190685  | -0.890494 |
|                    | H | -2.246013 | -0.323423 | 0.000000  |
| [UOH] <sup>+</sup> | U | -0.232296 | -0.100323 | -0.331137 |
|                    | O | -0.430081 | -0.996584 | -2.100677 |
|                    | H | -0.514192 | -1.437147 | -2.955227 |

Table 2.2: [UCH<sub>3</sub>]<sup>+</sup> + H<sub>2</sub>O PBE1PBE/SDD/6-311+g(d,p) Quintet Spin Energies (Hartree)

| Structure                                               | E0         | E_ZPE  | E_tot  | H_corr | G_corr  | E0+E_ZPE   | E0+E_tot   | E0+H_corr  | E0+G_corr  |
|---------------------------------------------------------|------------|--------|--------|--------|---------|------------|------------|------------|------------|
| [UCH <sub>3</sub> ] <sup>+</sup>                        | -516.42679 | .03203 | .03603 | .03698 | .00321  | -516.39477 | -516.39076 | -516.38981 | -516.42358 |
| H <sub>2</sub> O                                        | -76.37202  | .02160 | .02444 | .02538 | .00331  | -76.35042  | -76.34758  | -76.34664  | -76.36871  |
| [UCH <sub>3</sub> ] <sup>+</sup> + H <sub>2</sub> O (I) | -592.79881 | .05362 | .06047 | .06236 | .00652  | -592.74519 | -592.73834 | -592.73645 | -592.79229 |
| II                                                      | -592.84768 | .05652 | .06376 | .06471 | .02195  | -592.79115 | -592.78391 | -592.78297 | -592.82573 |
| TSII→III                                                | -592.80708 | .04872 | .05518 | .05613 | .01580  | -592.75836 | -592.75190 | -592.75096 | -592.79128 |
| III                                                     | -592.83241 | .04982 | .05714 | .05809 | .01545  | -592.78259 | -592.77527 | -592.77433 | -592.81696 |
| TSIII→IV                                                | -592.83177 | .04987 | .05632 | .05727 | .01652  | -592.78190 | -592.77544 | -592.77450 | -592.81524 |
| IV                                                      | -592.89809 | .05861 | .06522 | .06616 | .02393  | -592.83948 | -592.83287 | -592.83193 | -592.87416 |
| [UOH] <sup>+</sup>                                      | -552.41689 | .01156 | .01473 | .01567 | -.01092 | -552.40533 | -552.40216 | -552.40122 | -552.42780 |
| CH <sub>4</sub>                                         | -40.47076  | .04475 | .04762 | .04856 | .02508  | -40.42601  | -40.42314  | -40.42219  | -40.44567  |
| [UOH] <sup>+</sup> + CH <sub>4</sub> (V)                | -592.88764 | .05630 | .06234 | .06423 | .01417  | -592.83134 | -592.82530 | -592.82341 | -592.87348 |

Table 2.2.1: [UCH<sub>3</sub>]<sup>+</sup> + H<sub>2</sub>O PBE1PBE/SDD/6-311+g(d,p) Quintet Spin Structure Coordinates

| Structure                        | Coordinates |           |           |           |
|----------------------------------|-------------|-----------|-----------|-----------|
| [UCH <sub>3</sub> ] <sup>+</sup> | U           | -3.272222 | 1.028329  | -0.447550 |
|                                  | C           | -1.051155 | 0.778843  | -0.039390 |
|                                  | H           | -0.447809 | 1.483494  | -0.635086 |
|                                  | H           | -0.811631 | 0.957714  | 1.021772  |
|                                  | H           | -0.705783 | -0.238591 | -0.286431 |
| H <sub>2</sub> O                 | O           | -1.313077 | -0.308700 | 0.000000  |
|                                  | H           | -1.629005 | -1.213533 | 0.000000  |
|                                  | H           | -0.357440 | -0.381448 | 0.000000  |
| II                               | U           | -3.405649 | 0.752138  | 0.011670  |
|                                  | C           | -1.105156 | 0.786988  | -0.144444 |
|                                  | H           | -0.670669 | 1.289778  | -1.018643 |

|                          |   |           |           |           |
|--------------------------|---|-----------|-----------|-----------|
|                          | H | -0.689293 | 1.270370  | 0.756200  |
|                          | H | -0.729561 | -0.250716 | -0.152148 |
|                          | O | -3.753504 | 2.941224  | -1.028813 |
|                          | H | -3.629017 | 3.151441  | -1.964715 |
|                          | H | -3.951333 | 3.772717  | -0.576164 |
| <b>TSII→III</b>          | U | -3.460408 | 0.864205  | -0.302310 |
|                          | C | -1.136530 | 0.902908  | -0.216880 |
|                          | H | -0.645546 | 1.210015  | -1.150081 |
|                          | H | -0.734903 | -0.088306 | 0.051517  |
|                          | H | -0.794801 | 1.604806  | 0.561031  |
|                          | O | -3.698853 | 2.697106  | -1.353048 |
|                          | H | -3.695236 | 3.548622  | -1.803159 |
|                          | H | -3.767907 | 2.974583  | 0.095870  |
| <b>III</b>               | U | -2.909570 | 2.265824  | 0.500943  |
|                          | C | -0.970370 | 0.403455  | -0.215883 |
|                          | H | -0.510147 | 1.213341  | -0.783100 |
|                          | H | -0.499449 | 0.084797  | 0.710584  |
|                          | H | -1.650443 | -0.277793 | -0.723920 |
|                          | O | -3.802251 | 2.144056  | -1.284568 |
|                          | H | -4.177492 | 2.162707  | -2.170194 |
|                          | H | -1.483917 | 3.539320  | -0.109197 |
| <b>TSIII→IV</b>          | U | -3.146089 | 1.990025  | 0.504358  |
|                          | C | -0.942696 | 0.562335  | -0.256499 |
|                          | H | -0.594542 | 1.078844  | -1.144111 |
|                          | H | -0.311351 | 0.601395  | 0.627086  |
|                          | H | -1.585914 | -0.311602 | -0.396878 |
|                          | O | -3.843541 | 2.194950  | -1.359160 |
|                          | H | -4.114952 | 2.347332  | -2.269458 |
|                          | H | -1.464552 | 3.072429  | 0.219330  |
| <b>IV</b>                | U | -3.740867 | 1.207207  | -0.591915 |
|                          | C | -0.857493 | 1.182405  | -0.213158 |
|                          | H | 0.225251  | 1.181376  | -0.075340 |
|                          | H | -1.303062 | 1.049330  | 0.783082  |
|                          | H | -1.089300 | 0.349370  | -0.891400 |
|                          | O | -4.807334 | 2.786640  | -1.176353 |
|                          | H | -5.290841 | 3.569569  | -1.459551 |
|                          | H | -1.110532 | 2.158043  | -0.652425 |
| <b>CH<sub>4</sub></b>    | C | -1.155386 | -0.323437 | -0.000000 |
|                          | H | -0.791754 | -1.351983 | 0.000000  |
|                          | H | -0.791735 | 0.190830  | 0.890743  |
|                          | H | -0.791735 | 0.190830  | -0.890743 |
|                          | H | -2.246319 | -0.323423 | -0.000000 |
| <b>[UOH]<sup>+</sup></b> | U | -0.234402 | -0.104984 | -0.341597 |
|                          | O | -0.426395 | -0.995996 | -2.095363 |
|                          | H | -0.515772 | -1.433074 | -2.950081 |

Table 2.3: [UCH<sub>3</sub>]<sup>+</sup> + H<sub>2</sub>O B3LYP/SDD/6-311+g(d,p) Singlet Spin Energies (Hartree)

| Structure                                               | E0         | E_ZPE  | E_tot  | H_corr | G_corr | E0+E_ZPE   | E0+E_tot   | E0+H_corr  | E0+G_corr  |
|---------------------------------------------------------|------------|--------|--------|--------|--------|------------|------------|------------|------------|
| [UCH <sub>3</sub> ] <sup>+</sup>                        | -516.49451 | .03174 | .03581 | .03675 | .00439 | -516.46277 | -516.45871 | -516.45776 | -516.49012 |
| H <sub>2</sub> O                                        | -76.45846  | .02129 | .02413 | .02507 | .00299 | -76.43718  | -76.43434  | -76.43340  | -76.45547  |
| [UCH <sub>3</sub> ] <sup>+</sup> + H <sub>2</sub> O (I) | -592.95297 | .05303 | .05993 | .06182 | .00738 | -592.89995 | -592.89305 | -592.89116 | -592.94559 |
| II                                                      | -593.00750 | .05582 | .06312 | .06406 | .02281 | -592.95168 | -592.94438 | -592.94344 | -592.98469 |
| <b>TSII→III</b>                                         | -592.98456 | .04976 | .05610 | .05704 | .01849 | -592.93480 | -592.92847 | -592.92752 | -592.96608 |
| III                                                     | -593.07282 | .05071 | .05725 | .05819 | .01953 | -593.02211 | -593.01558 | -593.01463 | -593.05329 |

|                                          |            |        |        |        |         |            |            |            |            |
|------------------------------------------|------------|--------|--------|--------|---------|------------|------------|------------|------------|
| TSIII→IV                                 | -593.03595 | .05113 | .05660 | .05755 | .02081  | -592.98482 | -592.97934 | -592.97840 | -593.01514 |
| IV                                       | -593.05982 | .05830 | .06443 | .06537 | .02677  | -593.00152 | -592.99539 | -592.99445 | -593.03305 |
| CH <sub>4</sub>                          | -40.53393  | .04455 | .04742 | .04836 | .02488  | -40.48938  | -40.48651  | -40.48557  | -40.50904  |
| [UOH] <sup>+</sup>                       | -552.50789 | .01148 | .01463 | .01557 | -.00833 | -552.49641 | -552.49326 | -552.49232 | -552.51622 |
| [UOH] <sup>+</sup> + CH <sub>4</sub> (V) | -593.04182 | .05603 | .06204 | .06393 | .01656  | -592.98579 | -592.97977 | -592.97789 | -593.02526 |

Table 2.3.1: [UCH<sub>3</sub>]<sup>+</sup> + H<sub>2</sub>O B3LYP/SDD/6-311+g(d,p) Singlet Spin Structure Coordinates

| Structure                        | Coordinates |           |           |           |
|----------------------------------|-------------|-----------|-----------|-----------|
| [UCH <sub>3</sub> ] <sup>+</sup> | U           | -3.253294 | 1.047442  | -0.437384 |
|                                  | C           | -1.044015 | 0.762871  | -0.042847 |
|                                  | H           | -0.472086 | 1.487361  | -0.644763 |
|                                  | H           | -0.837913 | 0.958493  | 1.021838  |
|                                  | H           | -0.681292 | -0.246377 | -0.283530 |
| H <sub>2</sub> O                 | O           | -1.313436 | -0.308152 | 0.000000  |
|                                  | H           | -1.631916 | -1.215829 | 0.000000  |
|                                  | H           | -0.354171 | -0.379700 | 0.000000  |
| II                               | U           | -3.160569 | 0.651947  | -0.890090 |
|                                  | C           | -1.036646 | 0.788296  | -0.067015 |
|                                  | H           | -0.315708 | 1.194791  | -0.790241 |
|                                  | H           | -0.946219 | 1.351137  | 0.872005  |
|                                  | H           | -0.754375 | -0.260107 | 0.141879  |
|                                  | O           | -3.804704 | 2.962712  | -1.100931 |
|                                  | H           | -4.712879 | 3.300985  | -1.169353 |
|                                  | H           | -3.203084 | 3.724177  | -1.113314 |
| TSII→III                         | U           | -3.396388 | 0.827527  | -0.374106 |
|                                  | C           | -1.117903 | 0.899598  | -0.246342 |
|                                  | H           | -0.548553 | 1.093309  | -1.162560 |
|                                  | H           | -0.783060 | -0.064562 | 0.173624  |
|                                  | H           | -0.874158 | 1.693146  | 0.480203  |
|                                  | O           | -3.736161 | 2.728880  | -1.252540 |
|                                  | H           | -3.774074 | 3.598905  | -1.676094 |
|                                  | H           | -3.703887 | 2.937135  | -0.059245 |
| III                              | U           | -2.725338 | 2.089793  | 0.461273  |
|                                  | C           | -1.202658 | 0.539161  | -0.189597 |
|                                  | H           | -0.571292 | 1.108426  | -0.894628 |
|                                  | H           | -0.579616 | 0.261173  | 0.676175  |
|                                  | H           | -1.546576 | -0.371596 | -0.690901 |
|                                  | O           | -3.722816 | 2.147348  | -1.246029 |
|                                  | H           | -4.090928 | 2.186736  | -2.139259 |
|                                  | H           | -1.564415 | 3.574666  | -0.052367 |
| TSIII→IV                         | U           | -2.956166 | 1.668753  | 0.433186  |
|                                  | C           | -0.987366 | 0.920107  | -0.282029 |
|                                  | H           | -0.106007 | 0.950935  | -0.919937 |
|                                  | H           | -0.695674 | 0.552157  | 0.727806  |
|                                  | H           | -1.710685 | 0.151058  | -0.744497 |
|                                  | O           | -3.974237 | 2.275830  | -1.178532 |
|                                  | H           | -4.372105 | 2.571756  | -2.008166 |
|                                  | H           | -1.201398 | 2.445111  | -0.103164 |
| IV                               | U           | -3.591418 | 1.020416  | -0.778183 |
|                                  | C           | -1.016168 | 1.242228  | -0.265381 |
|                                  | H           | 0.034325  | 1.444457  | -0.054772 |
|                                  | H           | -1.591455 | 1.695740  | 0.568792  |
|                                  | H           | -1.141412 | 0.145678  | -0.303434 |
|                                  | O           | -4.501291 | 2.784836  | -0.977007 |

|                    |   |           |           |           |
|--------------------|---|-----------|-----------|-----------|
|                    | H | -4.894819 | 3.662548  | -1.062440 |
|                    | H | -1.231944 | 1.718037  | -1.244634 |
| CH <sub>4</sub>    | C | -1.155386 | -0.323437 | 0.000000  |
|                    | H | -0.791856 | -1.351694 | -0.000000 |
|                    | H | -0.791837 | 0.190685  | 0.890494  |
|                    | H | -0.791837 | 0.190685  | -0.890494 |
|                    | H | -2.246013 | -0.323423 | 0.000000  |
| [UOH] <sup>+</sup> | U | -0.232542 | -0.091598 | -0.316443 |
|                    | O | -0.418249 | -0.970342 | -2.041828 |
|                    | H | -0.511919 | -1.406538 | -2.900016 |

Table 2.4: [UCH<sub>3</sub>]<sup>+</sup> + H<sub>2</sub>O PBE1PBE/SDD/6-311+g(d,p) Singlet Spin Energies (Hartree)

| Structure                                               | E0         | E_ZPE  | E_tot  | H_corr | G_corr  | E0+E_ZPE   | E0+E_tot   | E0+H_corr  | E0+G_corr  |
|---------------------------------------------------------|------------|--------|--------|--------|---------|------------|------------|------------|------------|
| [UCH <sub>3</sub> ] <sup>+</sup>                        | -516.32691 | .03153 | .03580 | .03674 | .00387  | -516.29538 | -516.29111 | -516.29017 | -516.32304 |
| H <sub>2</sub> O                                        | -76.37202  | .02160 | .02444 | .02538 | .00331  | -76.35042  | -76.34758  | -76.34664  | -76.36871  |
| [UCH <sub>3</sub> ] <sup>+</sup> + H <sub>2</sub> O (I) | -592.69893 | .05313 | .06024 | .06212 | .00718  | -592.64580 | -592.63870 | -592.63681 | -592.69175 |
| II                                                      | -592.75618 | .05599 | .06341 | .06435 | .02286  | -592.70019 | -592.69278 | -592.69183 | -592.73332 |
| TSII→III                                                | -592.73709 | .05027 | .05662 | .05757 | .01902  | -592.68683 | -592.68047 | -592.67952 | -592.71807 |
| III                                                     | -592.82919 | .05112 | .05760 | .05854 | .02013  | -592.77807 | -592.77159 | -592.77065 | -592.80906 |
| TSIII→IV                                                | -592.79286 | .05154 | .05690 | .05785 | .02137  | -592.74132 | -592.73596 | -592.73501 | -592.77150 |
| IV                                                      | -592.80953 | .05847 | .06434 | .06528 | .02737  | -592.75106 | -592.74519 | -592.74424 | -592.78216 |
| [UOH] <sup>+</sup>                                      | -552.31752 | .01154 | .01470 | .01564 | -.01097 | -552.30598 | -552.30282 | -552.30188 | -552.32849 |
| CH <sub>4</sub>                                         | -40.47076  | .04475 | .04762 | .04856 | .02508  | -40.42601  | -40.42314  | -40.42219  | -40.44567  |
| [UOH] <sup>+</sup> + CH <sub>4</sub> (V)                | -592.78828 | .05629 | .06232 | .06421 | .01412  | -592.73199 | -592.72596 | -592.72407 | -592.77416 |

Table 2.4.1: [UCH<sub>3</sub>]<sup>+</sup> + H<sub>2</sub>O PBE1PBE/SDD/6-311+g(d,p) Singlet Spin Structure Coordinates

| Structure                        | Coordinates |           |           |           |
|----------------------------------|-------------|-----------|-----------|-----------|
| [UCH <sub>3</sub> ] <sup>+</sup> | U           | -3.229849 | 1.070378  | -0.424760 |
|                                  | C           | -1.051291 | 0.744150  | -0.050543 |
|                                  | H           | -0.496983 | 1.487813  | -0.650181 |
|                                  | H           | -0.863313 | 0.958928  | 1.016452  |
|                                  | H           | -0.647163 | -0.251479 | -0.277653 |
| H <sub>2</sub> O                 | O           | -1.313077 | -0.308700 | 0.000000  |
|                                  | H           | -1.629005 | -1.213533 | 0.000000  |
|                                  | H           | -0.357440 | -0.381448 | 0.000000  |
| II                               | U           | -3.146413 | 0.658233  | -0.897347 |
|                                  | C           | -1.054426 | 0.812483  | -0.074391 |
|                                  | H           | -0.324347 | 1.195299  | -0.802661 |
|                                  | H           | -0.943879 | 1.372075  | 0.864585  |
|                                  | H           | -0.798087 | -0.244991 | 0.135996  |
|                                  | O           | -3.787786 | 2.941504  | -1.090531 |
|                                  | H           | -4.690672 | 3.278603  | -1.185102 |
|                                  | H           | -3.188572 | 3.700733  | -1.067606 |
| TSII→III                         | U           | -3.388260 | 0.834577  | -0.336028 |
|                                  | C           | -1.136669 | 0.895997  | -0.272149 |
|                                  | H           | -0.539104 | 1.116876  | -1.163083 |
|                                  | H           | -0.786164 | -0.058543 | 0.158365  |
|                                  | H           | -0.944819 | 1.694059  | 0.471660  |
|                                  | O           | -3.716732 | 2.716126  | -1.229991 |

|                    |   |           |           |           |
|--------------------|---|-----------|-----------|-----------|
|                    | H | -3.755154 | 3.573988  | -1.672037 |
|                    | H | -3.667282 | 2.940857  | -0.073797 |
| III                | U | -2.699936 | 2.107530  | 0.461343  |
|                    | C | -1.236460 | 0.538515  | -0.172968 |
|                    | H | -0.607262 | 1.199269  | -0.807339 |
|                    | H | -0.617363 | 0.204434  | 0.674957  |
|                    | H | -1.529828 | -0.328872 | -0.771878 |
|                    | O | -3.699385 | 2.125780  | -1.222563 |
|                    | H | -4.082208 | 2.143990  | -2.107539 |
|                    | H | -1.531198 | 3.545060  | -0.129345 |
| TSIII→IV           | U | -2.948558 | 1.620613  | 0.442167  |
|                    | C | -1.008816 | 0.956977  | -0.301467 |
|                    | H | -0.127658 | 0.981240  | -0.942716 |
|                    | H | -0.712584 | 0.584494  | 0.710892  |
|                    | H | -1.733296 | 0.164350  | -0.751211 |
|                    | O | -3.933635 | 2.243570  | -1.159594 |
|                    | H | -4.317793 | 2.547474  | -1.990026 |
|                    | H | -1.221300 | 2.436989  | -0.083377 |
| IV                 | U | -3.510306 | 1.007025  | -0.769842 |
|                    | C | -1.066508 | 1.257754  | -0.275723 |
|                    | H | -0.018948 | 1.475404  | -0.062969 |
|                    | H | -1.649652 | 1.712761  | 0.563961  |
|                    | H | -1.175598 | 0.152446  | -0.304575 |
|                    | O | -4.425626 | 2.751932  | -0.959570 |
|                    | H | -4.808118 | 3.632495  | -1.038155 |
|                    | H | -1.279426 | 1.724123  | -1.270186 |
| CH <sub>4</sub>    | C | -1.155386 | -0.323437 | -0.000000 |
|                    | H | -0.791754 | -1.351983 | 0.000000  |
|                    | H | -0.791735 | 0.190830  | 0.890743  |
|                    | H | -0.791735 | 0.190830  | -0.890743 |
|                    | H | -2.246319 | -0.323423 | -0.000000 |
| [UOH] <sup>+</sup> | U | -0.379865 | -0.013097 | -0.353081 |
|                    | O | -0.379789 | -0.990924 | -2.032415 |
|                    | H | -0.403056 | -1.464458 | -2.872792 |

Table 2.5: [UCH<sub>3</sub>]<sup>+</sup> + H<sub>2</sub>O B3LYP/SDD/6-311+g(d,p) Triplet Spin Energies (Hartree)

| Structure                                               | EO         | E_ZPE  | E_tot  | H_corr | G_corr  | EO+E_ZPE   | EO+E_tot   | EO+H_corr  | EO+G_corr  |
|---------------------------------------------------------|------------|--------|--------|--------|---------|------------|------------|------------|------------|
| [UCH <sub>3</sub> ] <sup>+</sup>                        | -516.57310 | .03193 | .03590 | .03684 | .00362  | -516.54117 | -516.53720 | -516.53626 | -516.56948 |
| H <sub>2</sub> O                                        | -76.45846  | .02129 | .02413 | .02507 | .00299  | -76.43718  | -76.43434  | -76.43340  | -76.45547  |
| [UCH <sub>3</sub> ] <sup>+</sup> + H <sub>2</sub> O (I) | -593.03156 | .05321 | .06002 | .06191 | .00662  | -592.97835 | -592.97154 | -592.96965 | -593.02495 |
| II                                                      | -593.07715 | .05596 | .06324 | .06418 | .02167  | -593.02119 | -593.01392 | -593.01297 | -593.05548 |
| TSII→III                                                | -593.04529 | .04904 | .05536 | .05630 | .01673  | -592.99625 | -592.98993 | -592.98899 | -593.02856 |
| III                                                     | -593.11485 | .05065 | .05722 | .05817 | .01826  | -593.06420 | -593.05763 | -593.05669 | -593.09659 |
| TSIII→IV                                                | -593.08637 | .05051 | .05630 | .05724 | .01868  | -593.03586 | -593.03007 | -593.02913 | -593.06769 |
| IV                                                      | -593.13129 | .05802 | .06487 | .06582 | .02268  | -593.07327 | -593.06642 | -593.06548 | -593.10861 |
| [UOH] <sup>+</sup>                                      | -552.56987 | .01135 | .01456 | .01551 | -.01109 | -552.55852 | -552.55531 | -552.55436 | -552.58096 |
| CH <sub>4</sub>                                         | -40.53393  | .04455 | .04742 | .04836 | .02488  | -40.48938  | -40.48651  | -40.48557  | -40.50904  |
| [UOH] <sup>+</sup> + CH <sub>4</sub> (V)                | -593.10380 | .05590 | .06198 | .06387 | .01380  | -593.04790 | -593.04182 | -593.03993 | -593.09000 |

Table 2.5.1: [UCH<sub>3</sub>]<sup>+</sup> + H<sub>2</sub>O B3LYP/SDD/6-311+g(d,p) Triplet Spin Structure Coordinates

| Structure                        | Coordinates |           |           |           |
|----------------------------------|-------------|-----------|-----------|-----------|
| [UCH <sub>3</sub> ] <sup>+</sup> | U           | -3.286944 | 1.029979  | -0.450263 |
|                                  | C           | -1.045147 | 0.778165  | -0.038280 |
|                                  | H           | -0.444776 | 1.483636  | -0.634961 |
|                                  | H           | -0.808810 | 0.957534  | 1.022921  |
|                                  | H           | -0.702923 | -0.239524 | -0.286102 |
| H <sub>2</sub> O                 | O           | -1.313436 | -0.308152 | 0.000000  |
|                                  | H           | -1.631916 | -1.215829 | 0.000000  |
|                                  | H           | -0.354171 | -0.379700 | 0.000000  |
| II                               | U           | -3.380145 | 0.732612  | -0.095543 |
|                                  | C           | -1.057463 | 0.765945  | -0.138866 |
|                                  | H           | -0.562147 | 1.168046  | -1.031003 |
|                                  | H           | -0.685551 | 1.326306  | 0.734858  |
|                                  | H           | -0.716259 | -0.277544 | -0.019170 |
|                                  | O           | -3.804090 | 2.978936  | -1.043022 |
|                                  | H           | -3.743314 | 3.227118  | -1.979808 |
|                                  | H           | -3.985214 | 3.792519  | -0.544506 |
| TSII→III                         | U           | -3.482317 | 0.896542  | -0.271659 |
|                                  | C           | -1.153649 | 0.864411  | -0.157171 |
|                                  | H           | -0.662719 | 0.907786  | -1.139231 |
|                                  | H           | -0.770246 | 1.709311  | 0.433626  |
|                                  | H           | -0.817690 | -0.061981 | 0.337470  |
|                                  | O           | -3.689075 | 2.746851  | -1.355545 |
|                                  | H           | -3.652358 | 3.570870  | -1.862310 |
|                                  | H           | -3.706129 | 3.080148  | -0.102239 |
| III                              | U           | -2.718056 | 2.073979  | 0.403038  |
|                                  | C           | -1.158951 | 0.516460  | -0.161413 |
|                                  | H           | -0.485641 | 1.112348  | -0.805635 |
|                                  | H           | -0.588616 | 0.205445  | 0.727666  |
|                                  | H           | -1.477111 | -0.371535 | -0.717851 |
|                                  | O           | -3.790423 | 2.175648  | -1.272803 |
|                                  | H           | -4.230550 | 2.269872  | -2.128980 |
|                                  | H           | -1.554291 | 3.553491  | -0.119356 |
| TSIII→IV                         | U           | -3.050986 | 1.766908  | 0.424933  |
|                                  | C           | -0.977684 | 0.956502  | -0.205015 |
|                                  | H           | -0.165862 | 1.034682  | -0.924888 |
|                                  | H           | -0.565851 | 0.671472  | 0.777223  |
|                                  | H           | -1.657487 | 0.114648  | -0.569141 |
|                                  | O           | -3.982249 | 2.127681  | -1.327902 |
|                                  | H           | -4.356794 | 2.314032  | -2.197609 |
|                                  | H           | -1.246726 | 2.549782  | -0.052935 |
| IV                               | U           | -3.797484 | 1.324014  | -0.572370 |
|                                  | C           | -0.783752 | 1.164152  | -0.223110 |
|                                  | H           | 0.291290  | 1.092153  | -0.049325 |
|                                  | H           | -1.230834 | 1.543645  | 0.706397  |
|                                  | H           | -1.135846 | 0.153681  | -0.465551 |
|                                  | O           | -4.908609 | 2.904753  | -1.100011 |
|                                  | H           | -5.437518 | 3.671223  | -1.355404 |
|                                  | H           | -0.931429 | 1.860320  | -1.057685 |
| CH <sub>4</sub>                  | C           | -1.155386 | -0.323437 | 0.000000  |
|                                  | H           | -0.791856 | -1.351694 | -0.000000 |
|                                  | H           | -0.791837 | 0.190685  | 0.890494  |
|                                  | H           | -0.791837 | 0.190685  | -0.890494 |
|                                  | H           | -2.246013 | -0.323423 | 0.000000  |
| [UOH] <sup>+</sup>               | U           | -0.233077 | -0.100261 | -0.331941 |
|                                  | O           | -0.427826 | -0.997432 | -2.099505 |
|                                  | H           | -0.515666 | -1.436362 | -2.955596 |

Table 2.6:  $[\text{UCH}_3]^+ + \text{H}_2\text{O}$  PBE1PBE/SDD/6-311+g(d,p) Triplet Spin Energies (Hartree)

| Structure                                   | E0         | E_ZPE  | E_tot  | H_corr | G_corr  | E0+E_ZPE   | E0+E_tot   | E0+H_corr  | E0+G_corr  |
|---------------------------------------------|------------|--------|--------|--------|---------|------------|------------|------------|------------|
| $[\text{UCH}_3]^+$                          | -516.41461 | .03195 | .03599 | .03694 | .00357  | -516.38266 | -516.37862 | -516.37767 | -516.41104 |
| $\text{H}_2\text{O}$                        | -76.37202  | .02160 | .02444 | .02538 | .00331  | -76.35042  | -76.34758  | -76.34664  | -76.36871  |
| $[\text{UCH}_3]^+ + \text{H}_2\text{O}$ (I) | -592.78663 | .05355 | .06043 | .06232 | .00688  | -592.73308 | -592.72620 | -592.72431 | -592.77975 |
| II                                          | -592.80940 | .05624 | .06361 | .06456 | .02181  | -592.75316 | -592.74579 | -592.74484 | -592.78760 |
| TSII→III                                    | -592.78500 | .04962 | .05601 | .05695 | .01723  | -592.73538 | -592.72899 | -592.72804 | -592.76776 |
| III                                         | -592.87494 | .05106 | .05758 | .05852 | .01884  | -592.82388 | -592.81736 | -592.81642 | -592.85610 |
| TSIII→IV                                    | -592.84836 | .05089 | .05661 | .05755 | .01922  | -592.79747 | -592.79175 | -592.79080 | -592.82914 |
| IV                                          | -592.88741 | .05827 | .06497 | .06592 | .02277  | -592.82914 | -592.82244 | -592.82149 | -592.86464 |
| $[\text{UOH}]^+$                            | -552.40278 | .01147 | .01464 | .01559 | -.01094 | -552.39130 | -552.38813 | -552.38719 | -552.41372 |
| $\text{CH}_4$                               | -40.47076  | .04475 | .04762 | .04856 | .02508  | -40.42601  | -40.42314  | -40.42219  | -40.44567  |
| $[\text{UOH}]^+ + \text{CH}_4$ (V)          | -592.87353 | .05622 | .06226 | .06415 | .01414  | -592.81731 | -592.81127 | -592.80938 | -592.85939 |

Table 2.6.1:  $[\text{UCH}_3]^+ + \text{H}_2\text{O}$  PBE1PBE/SDD/6-311+g(d,p) Triplet Spin Structure Coordinates

| Structure            | Coordinates |           |           |           |
|----------------------|-------------|-----------|-----------|-----------|
| $[\text{UCH}_3]^+$   | U           | -3.269914 | 1.028067  | -0.447124 |
|                      | C           | -1.051626 | 0.778898  | -0.039478 |
|                      | H           | -0.448351 | 1.483802  | -0.635412 |
|                      | H           | -0.812296 | 0.957855  | 1.021974  |
|                      | H           | -0.706412 | -0.238832 | -0.286646 |
| $\text{H}_2\text{O}$ | O           | -1.313077 | -0.308700 | 0.000000  |
|                      | H           | -1.629005 | -1.213533 | 0.000000  |
|                      | H           | -0.357440 | -0.381448 | 0.000000  |
| II                   | U           | -3.206961 | 0.660235  | -0.735059 |
|                      | C           | -1.026076 | 0.789835  | -0.080097 |
|                      | H           | -0.343518 | 1.115876  | -0.878450 |
|                      | H           | -0.811965 | 1.381861  | 0.819771  |
|                      | H           | -0.774708 | -0.262820 | 0.156334  |
|                      | O           | -3.831622 | 2.976863  | -1.072364 |
|                      | H           | -4.603856 | 3.302097  | -1.556548 |
|                      | H           | -3.335476 | 3.749993  | -0.770647 |
| TSII→III             | U           | -3.449573 | 0.940461  | -0.257353 |
|                      | C           | -1.154808 | 0.851223  | -0.183668 |
|                      | H           | -0.638218 | 0.821971  | -1.152387 |
|                      | H           | -0.775105 | 1.732878  | 0.358950  |
|                      | H           | -0.836789 | -0.039727 | 0.384801  |
|                      | O           | -3.645194 | 2.762677  | -1.334079 |
|                      | H           | -3.591840 | 3.604249  | -1.803962 |
|                      | H           | -3.842656 | 3.040207  | -0.129361 |
| III                  | U           | -2.700177 | 2.082425  | 0.407562  |
|                      | C           | -1.193391 | 0.514943  | -0.147726 |
|                      | H           | -0.539490 | 1.185533  | -0.747834 |
|                      | H           | -0.607402 | 0.173777  | 0.719532  |
|                      | H           | -1.462143 | -0.344840 | -0.769605 |
|                      | O           | -3.761466 | 2.159750  | -1.252979 |
|                      | H           | -4.207691 | 2.243727  | -2.104190 |
|                      | H           | -1.531879 | 3.520393  | -0.180094 |

|                    |   |           |           |           |
|--------------------|---|-----------|-----------|-----------|
| TSIII→IV           | U | -3.036689 | 1.753088  | 0.439089  |
|                    | C | -1.006821 | 0.975118  | -0.218306 |
|                    | H | -0.198601 | 1.040501  | -0.945463 |
|                    | H | -0.585150 | 0.693119  | 0.763668  |
|                    | H | -1.687190 | 0.119390  | -0.563579 |
|                    | O | -3.929711 | 2.108519  | -1.311864 |
|                    | H | -4.292270 | 2.289718  | -2.184920 |
|                    | H | -1.267206 | 2.556254  | -0.053958 |
| IV                 | U | -3.744123 | 0.983565  | -0.738033 |
|                    | C | -0.984877 | 1.246512  | -0.258563 |
|                    | H | 0.075673  | 1.422286  | -0.067871 |
|                    | H | -1.528291 | 1.662269  | 0.606883  |
|                    | H | -1.114729 | 0.158682  | -0.349284 |
|                    | O | -4.524138 | 2.791672  | -0.995232 |
|                    | H | -4.891894 | 3.672974  | -1.118693 |
|                    | H | -1.221801 | 1.775979  | -1.196265 |
| CH <sub>4</sub>    | C | -1.155386 | -0.323437 | -0.000000 |
|                    | H | -0.791754 | -1.351983 | 0.000000  |
|                    | H | -0.791735 | 0.190830  | 0.890743  |
|                    | H | -0.791735 | 0.190830  | -0.890743 |
|                    | H | -2.246319 | -0.323423 | -0.000000 |
| [UOH] <sup>+</sup> | U | -0.233077 | -0.100261 | -0.331941 |
|                    | O | -0.427826 | -0.997432 | -2.099505 |
|                    | H | -0.515666 | -1.436362 | -2.955596 |

Table 2.7.1: [UCH<sub>3</sub>]<sup>+</sup> + H<sub>2</sub>O B3LYP/SDD/6-311+g(d,p) Quintet Spin Relative Energies (kJ/mol)

| Structure     | E0+E_ZPE | E0+E_tot | E0+H_corr | E0+G_corr |
|---------------|----------|----------|-----------|-----------|
| Reactants (I) | -107.903 | -106.598 | -106.601  | -111.004  |
| II            | -220.335 | -217.691 | -220.172  | -191.646  |
| TSII→III      | -130.233 | -129.973 | -132.454  | -96.1773  |
| III           | -205.818 | -202.82  | -205.301  | -176.533  |
| TSIII→IV      | -202.116 | -201.806 | -204.285  | -169.216  |
| IV            | -355.595 | -353.529 | -356.01   | -329.088  |
| Products (V)  | -340.27  | -340.793 | -340.795  | -333.084  |

Table 2.7.2: [UCH<sub>3</sub>]<sup>+</sup> + H<sub>2</sub>O PBE1PBE/SDD/6-311+g(d,p) Quintet Spin Relative Energies (kJ/mol)

| Structure     | E0+E_ZPE | E0+E_tot | E0+H_corr | E0+G_corr |
|---------------|----------|----------|-----------|-----------|
| Reactants (I) | -37.7153 | -36.1873 | -36.1873  | -41.0628  |
| II            | -158.404 | -155.837 | -158.318  | -128.854  |
| TSII→III      | -72.2984 | -71.7864 | -74.2649  | -38.4268  |
| III           | -135.922 | -133.142 | -135.623  | -105.842  |
| TSIII→IV      | -134.103 | -133.599 | -136.08   | -101.334  |
| IV            | -285.292 | -284.371 | -286.852  | -256.013  |
| Products (V)  | -263.915 | -264.498 | -264.498  | -254.225  |

Table 2.7.3:  $[\text{UCH}_3]^+ + \text{H}_2\text{O}$  B3LYP/SDD/6-311+g(d,p) Singlet Spin Relative Energies (kJ/mol)

| Structure              | EO+E_ZPE | EO+E_tot | EO+H_cor<br>r | EO+G_cor<br>r |
|------------------------|----------|----------|---------------|---------------|
| Reactants (I)          | 123.409  | 125.0631 | 125.0605      | 123.9577      |
| II                     | -12.4186 | -9.72223 | -12.2033      | 21.30068      |
| TSII $\rightarrow$ III | 31.89458 | 32.06523 | 29.58414      | 70.17174      |
| III                    | -197.335 | -196.639 | -199.121      | -158.811      |
| TSIII $\rightarrow$ IV | -99.4198 | -101.512 | -103.993      | -58.6379      |
| IV                     | -143.263 | -143.654 | -146.135      | -105.653      |
| Products (V)           | -101.974 | -102.644 | -102.644      | -85.208       |

Table 2.7.4:  $[\text{UCH}_3]^+ + \text{H}_2\text{O}$  PBE1PBE/SDD/6-311+g(d,p) Singlet Spin Relative Energies (kJ/mol)

| Structure              | EO+E_ZPE | EO+E_tot | EO+H_cor<br>r | EO+G_cor<br>r |
|------------------------|----------|----------|---------------|---------------|
| Reactants (I)          | 223.2227 | 225.4333 | 225.4333      | 222.8997      |
| II                     | 80.4322  | 83.44627 | 80.9678       | 113.7682      |
| TSII $\rightarrow$ III | 115.5115 | 115.7609 | 113.2798      | 153.7887      |
| III                    | -124.047 | -123.49  | -125.969      | -85.0977      |
| TSIII $\rightarrow$ IV | -27.5756 | -29.9281 | -32.4092      | 13.52658      |
| IV                     | -53.1296 | -54.1562 | -56.6347      | -14.4718      |
| Products (V)           | -3.06396 | -3.67833 | -3.67833      | 6.532244      |

Table 2.7.5:  $[\text{UCH}_3]^+ + \text{H}_2\text{O}$  B3LYP/SDD/6-311+g(d,p) Triplet Spin Relative Energies (kJ/mol)

| Structure              | EO+E_ZPE | EO+E_tot | EO+H_cor<br>r | EO+G_cor<br>r |
|------------------------|----------|----------|---------------|---------------|
| Reactants (I)          | -82.4381 | -81.0256 | -81.0282      | -84.3888      |
| II                     | -194.917 | -192.281 | -194.762      | -164.566      |
| TSII $\rightarrow$ III | -129.432 | -129.314 | -131.795      | -93.8748      |
| III                    | -307.845 | -307.06  | -309.541      | -272.493      |
| TSIII $\rightarrow$ IV | -233.425 | -234.699 | -237.177      | -196.613      |
| IV                     | -331.658 | -330.138 | -332.619      | -304.054      |
| Products (V)           | -265.039 | -265.54  | -265.543      | -255.196      |

Table 2.7.6:  $[\text{UCH}_3]^+ + \text{H}_2\text{O}$  PBE1PBE/SDD/6-311+g(d,p) Triplet Spin Relative Energies (kJ/mol)

| Structure              | EO+E_ZPE | EO+E_tot | EO+H_cor<br>r | EO+G_cor<br>r |
|------------------------|----------|----------|---------------|---------------|
| Reactants (I)          | -5.93888 | -4.3137  | -4.3137       | -8.14168      |
| II                     | -58.6432 | -55.7289 | -58.21        | -28.7414      |
| TSII $\rightarrow$ III | -11.9749 | -11.631  | -14.1094      | 23.32757      |
| III                    | -244.334 | -243.657 | -246.138      | -208.593      |
| TSIII $\rightarrow$ IV | -174.976 | -176.402 | -178.883      | -137.82       |
| IV                     | -258.139 | -256.981 | -259.462      | -231.034      |
| Products (V)           | -227.085 | -227.668 | -227.668      | -217.244      |

Figure 4:  $[\text{UCH}_3]^+ + \text{H}_2\text{O}$  B3LYP/SDD/6-311+g(d,p) Relative Enthalpy (kJ/mol)

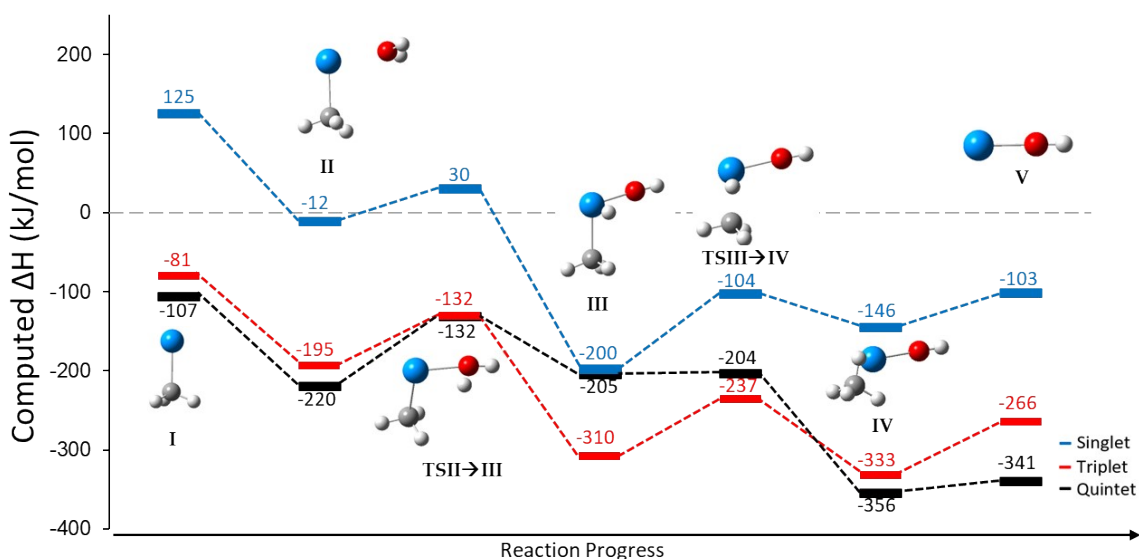

Figure 4.1:  $[\text{UCH}_3]^+ + \text{H}_2\text{O}$  PBE1PBE/SDD/6-311+g(d,p) Relative Enthalpy (kJ/mol)

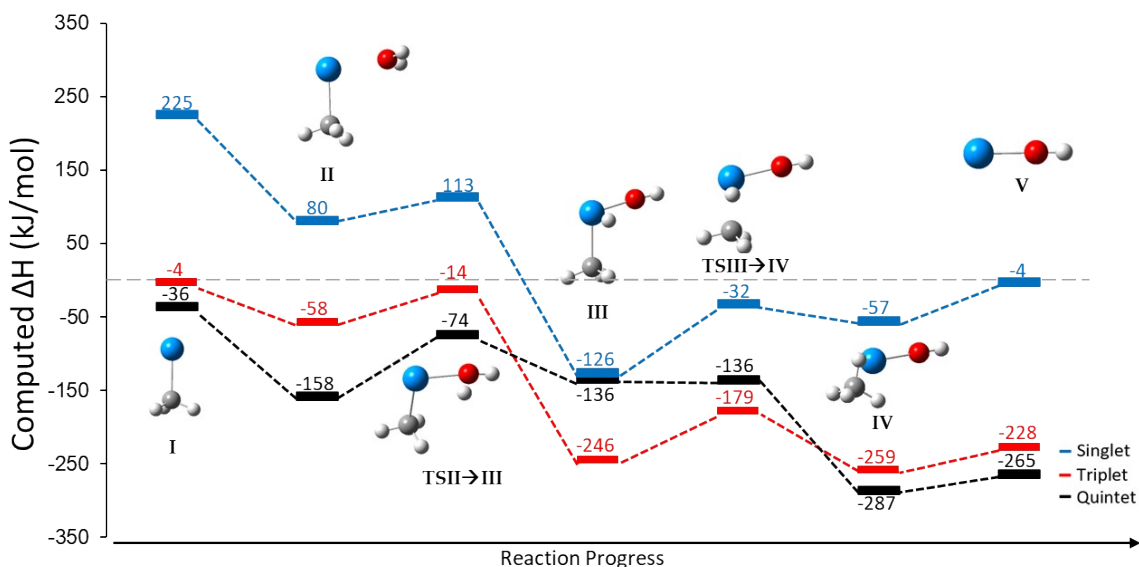

Table 3.1:  $[\text{UH}]^+ + \text{CH}_3\text{CH}_2\text{CN}$  B3LYP/SDD/6-311+g(d,p) Quintet Spin Energies (Hartree)

| Structure                                             | E0         | E_ZPE  | E_tot  | H_corr | G_corr  | E0+E_ZPE   | E0+E_tot   | E0+H_corr  | E0+G_corr  |
|-------------------------------------------------------|------------|--------|--------|--------|---------|------------|------------|------------|------------|
| $[\text{UH}]^+$                                       | -477.20060 | .00371 | .00608 | .00702 | -.01919 | -477.19689 | -477.19453 | -477.19358 | -477.21980 |
| $\text{CH}_3\text{CH}_2\text{CN}$                     | -172.12044 | .07406 | .07874 | .07968 | .04736  | -172.04639 | -172.04171 | -172.04076 | -172.07308 |
| $[\text{UH}]^+ + \text{CH}_3\text{CH}_2\text{CN}$ (I) | -649.32105 | .07777 | .08482 | .08670 | .02817  | -649.24328 | -649.23623 | -649.23435 | -649.29288 |
| II                                                    | -649.40250 | .07841 | .08606 | .08700 | .04136  | -649.32409 | -649.31644 | -649.31550 | -649.36114 |
| TSII→III                                              | -649.38704 | .07825 | .08501 | .08596 | .04317  | -649.30879 | -649.30203 | -649.30108 | -649.34387 |
| III                                                   | -649.44615 | .08549 | .09212 | .09306 | .05053  | -649.36066 | -649.35404 | -649.35309 | -649.39562 |

|                                                            |            |        |        |        |         |            |            |            |            |
|------------------------------------------------------------|------------|--------|--------|--------|---------|------------|------------|------------|------------|
| TSIII→IV                                                   | -649.38434 | .08085 | .08746 | .08841 | .04664  | -649.30349 | -649.29687 | -649.29593 | -649.33769 |
| IV                                                         | -649.40417 | .07864 | .08662 | .08756 | .04216  | -649.32553 | -649.31755 | -649.31661 | -649.36201 |
| [UCH <sub>2</sub> CH <sub>3</sub> ] <sup>+</sup>           | -555.90647 | .06094 | .06524 | .06618 | .03012  | -555.84553 | -555.84123 | -555.84029 | -555.87635 |
| HCN                                                        | -93.45449  | .01636 | .01890 | .01985 | -.00300 | -93.43813  | -93.43559  | -93.43465  | -93.45749  |
| [UCH <sub>2</sub> CH <sub>3</sub> ] <sup>+</sup> + HCN (V) | -649.36096 | .07731 | .08414 | .08603 | .02712  | -649.28366 | -649.27682 | -649.27493 | -649.33384 |

Table 3.1.1: [UH]<sup>+</sup> + CH<sub>3</sub>CH<sub>2</sub>CN B3LYP/SDD/6-311+g(d,p) Quintet Spin Structure Coordinates

| Structure                          | Coordinates |           |           |           |
|------------------------------------|-------------|-----------|-----------|-----------|
| [UH] <sup>+</sup>                  | U           | 0.000000  | 0.000000  | 0.021045  |
|                                    | H           | 0.000000  | 0.000000  | -1.936098 |
| CH <sub>3</sub> CH <sub>2</sub> CN | C           | -1.429488 | 0.666866  | 0.304718  |
|                                    | C           | -0.038681 | 0.098523  | -0.027641 |
|                                    | C           | 1.032188  | 1.075832  | 0.161780  |
|                                    | N           | 1.866229  | 1.857431  | 0.315500  |
|                                    | H           | -1.665097 | 1.520854  | -0.332711 |
|                                    | H           | -1.479887 | 0.992900  | 1.345047  |
|                                    | H           | 0.181016  | -0.770291 | 0.600286  |
|                                    | H           | -0.002845 | -0.246048 | -1.065624 |
|                                    | H           | -2.188892 | -0.101524 | 0.146757  |
| II                                 | U           | 0.106883  | 0.167081  | -0.701608 |
|                                    | H           | -0.008015 | 2.168334  | -0.524749 |
|                                    | N           | 2.349297  | -0.059321 | -0.550389 |
|                                    | C           | 2.322569  | 0.030586  | 0.655418  |
|                                    | C           | 3.070810  | 0.101360  | 1.931704  |
|                                    | C           | 2.435677  | -0.681525 | 3.088698  |
|                                    | H           | 3.057644  | -0.575390 | 3.978143  |
|                                    | H           | 1.440281  | -0.301751 | 3.328582  |
|                                    | H           | 2.362236  | -1.745721 | 2.856851  |
|                                    | H           | 4.087655  | -0.250082 | 1.720038  |
|                                    | H           | 3.143415  | 1.165903  | 2.182196  |
| TSII→III                           | U           | 0.504458  | 0.459788  | -0.971954 |
|                                    | H           | 0.959759  | 1.058656  | 0.918628  |
|                                    | N           | 2.624202  | 0.323159  | -0.682316 |
|                                    | C           | 2.424234  | 0.183561  | 0.531334  |
|                                    | C           | 3.131041  | 0.052763  | 1.828998  |
|                                    | C           | 2.283646  | -0.469469 | 2.990143  |
|                                    | H           | 2.890655  | -0.518825 | 3.895043  |
|                                    | H           | 1.436959  | 0.191043  | 3.188692  |
|                                    | H           | 1.904178  | -1.472845 | 2.785240  |
|                                    | H           | 3.990844  | -0.598694 | 1.635673  |
|                                    | H           | 3.540919  | 1.044457  | 2.059310  |
| III                                | U           | 0.407186  | 0.059497  | 0.351564  |
|                                    | H           | 4.190439  | 0.369506  | -0.848101 |
|                                    | N           | 2.458033  | -0.090554 | 0.137939  |
|                                    | C           | 3.724367  | -0.169051 | -0.012226 |
|                                    | C           | 4.667087  | -0.938294 | 0.853433  |
|                                    | C           | 4.060898  | -1.700428 | 2.025099  |
|                                    | H           | 4.843811  | -2.219835 | 2.579520  |
|                                    | H           | 3.553581  | -1.026981 | 2.720353  |
|                                    | H           | 3.342246  | -2.450267 | 1.685233  |
|                                    | H           | 5.223344  | -1.607417 | 0.180178  |
|                                    | H           | 5.428975  | -0.219204 | 1.189544  |
| TSIII→IV                           | U           | 3.086826  | -2.292785 | -0.169799 |
|                                    | H           | 4.257100  | 1.124148  | -0.115909 |
|                                    | N           | 3.093594  | -0.292872 | -1.294330 |
|                                    | C           | 3.763000  | 0.226673  | -0.455696 |
|                                    | C           | 4.477558  | -1.048612 | 1.340951  |
|                                    | C           | 3.583875  | -1.338944 | 2.553166  |

|                                                  |   |           |           |           |
|--------------------------------------------------|---|-----------|-----------|-----------|
|                                                  | H | 4.157982  | -1.750676 | 3.387391  |
|                                                  | H | 3.070411  | -0.437144 | 2.887194  |
|                                                  | H | 2.778571  | -2.086992 | 2.375357  |
|                                                  | H | 5.152545  | -1.912115 | 1.102703  |
|                                                  | H | 5.148823  | -0.216654 | 1.533992  |
| IV                                               | U | 3.002867  | -1.157136 | -0.241847 |
|                                                  | H | 3.412548  | 2.162374  | 0.341091  |
|                                                  | N | 4.039983  | 0.559772  | -0.892480 |
|                                                  | C | 3.389313  | 1.115658  | 0.028505  |
|                                                  | C | 4.602097  | -2.132252 | 1.122647  |
|                                                  | C | 3.603752  | -2.070902 | 2.291275  |
|                                                  | H | 4.075301  | -1.904817 | 3.262203  |
|                                                  | H | 2.902713  | -1.192362 | 2.226512  |
|                                                  | H | 2.978468  | -2.965881 | 2.378036  |
|                                                  | H | 4.931517  | -3.152887 | 0.907573  |
|                                                  | H | 5.483596  | -1.510602 | 1.299476  |
| HCN                                              | C | 0.000000  | 0.000000  | -0.498334 |
|                                                  | H | 0.000000  | 0.000000  | -1.564845 |
|                                                  | N | -0.000000 | 0.000000  | 0.650693  |
| [UCH <sub>2</sub> CH <sub>3</sub> ] <sup>+</sup> | U | 2.892999  | -1.381855 | -0.378885 |
|                                                  | C | 4.583783  | -2.057440 | 1.009661  |
|                                                  | C | 3.662196  | -1.935509 | 2.247734  |
|                                                  | H | 4.175821  | -2.214062 | 3.171323  |
|                                                  | H | 3.297651  | -0.907490 | 2.418575  |
|                                                  | H | 2.779228  | -2.597352 | 2.199476  |
|                                                  | H | 4.945241  | -3.083850 | 0.876606  |
|                                                  | H | 5.451805  | -1.392429 | 1.086801  |

Table 3.2: [UH]<sup>+</sup> + CH<sub>3</sub>CH<sub>2</sub>CN PBE1PBE/SDD/6-311+g(d,p) Quintet Spin Energies (Hartree)

| Structure                                                  | E0         | E_ZPE  | E_tot  | H_corr | G_corr  | E0+E_ZPE   | E0+E_tot   | E0+H_corr  | E0+G_corr  |
|------------------------------------------------------------|------------|--------|--------|--------|---------|------------|------------|------------|------------|
| [UH] <sup>+</sup>                                          | -477.12109 | .00377 | .00614 | .00708 | -.01913 | -477.11732 | -477.11495 | -477.11401 | -477.14021 |
| CH <sub>3</sub> CH <sub>2</sub> CN                         | -171.90168 | .07452 | .07919 | .08013 | .04785  | -171.82716 | -171.82249 | -171.82155 | -171.85383 |
| [UH] <sup>+</sup> + CH <sub>3</sub> CH <sub>2</sub> CN (I) | -649.02276 | .07829 | .08532 | .08721 | .02872  | -648.94447 | -648.93744 | -648.93555 | -648.99404 |
| II                                                         | -649.08825 | .07906 | .08655 | .08749 | .04285  | -649.00919 | -649.00170 | -649.00075 | -649.04540 |
| TSII→III                                                   | -649.07918 | .07932 | .08580 | .08675 | .04469  | -648.99986 | -648.99338 | -648.99244 | -649.03449 |
| III                                                        | -649.13164 | .08599 | .09261 | .09356 | .05104  | -649.04564 | -649.03903 | -649.03808 | -649.08060 |
| TSIII→IV                                                   | -649.07292 | .08107 | .08735 | .08829 | .04758  | -648.99185 | -648.98557 | -648.98463 | -649.02533 |
| IV                                                         | -649.09237 | .07948 | .08721 | .08816 | .04361  | -649.01289 | -649.00516 | -649.00422 | -649.04876 |
| [UCH <sub>2</sub> CH <sub>3</sub> ] <sup>+</sup>           | -555.70335 | .06129 | .06628 | .06723 | .02954  | -555.64207 | -555.63707 | -555.63612 | -555.67381 |
| HCN                                                        | -93.33544  | .01649 | .01903 | .01997 | -.00287 | -93.31895  | -93.31641  | -93.31547  | -93.33831  |
| [UCH <sub>2</sub> CH <sub>3</sub> ] <sup>+</sup> + HCN (V) | -649.03879 | .07778 | .08531 | .08720 | .02668  | -648.96101 | -648.95348 | -648.95159 | -649.01211 |

Table 3.2.1: [UH]<sup>+</sup> + CH<sub>3</sub>CH<sub>2</sub>CN PBE1PBE/SDD/6-311+g(d,p) Quintet Spin Structure Coordinates

| Structure                          | Coordinates |           |          |           |
|------------------------------------|-------------|-----------|----------|-----------|
| [UH] <sup>+</sup>                  | U           | -0.282792 | 0.024095 | 0.017719  |
|                                    | H           | -0.733284 | 1.219330 | 1.490648  |
| CH <sub>3</sub> CH <sub>2</sub> CN | C           | -1.423276 | 0.666142 | 0.303808  |
|                                    | C           | -0.042260 | 0.099303 | -0.026986 |
|                                    | C           | 1.023045  | 1.073641 | 0.162122  |
|                                    | N           | 1.855821  | 1.855504 | 0.315992  |

|          |   |           |           |           |
|----------|---|-----------|-----------|-----------|
|          | H | -1.657991 | 1.521138  | -0.333377 |
|          | H | -1.472810 | 0.993170  | 1.344342  |
|          | H | 0.180748  | -0.769399 | 0.600941  |
|          | H | -0.003160 | -0.244935 | -1.065573 |
|          | H | -2.185573 | -0.100020 | 0.146843  |
| II       | U | 0.499845  | -0.014950 | -0.923635 |
|          | H | -0.531823 | 1.257157  | 0.225837  |
|          | N | 2.542107  | 0.778711  | -0.485609 |
|          | C | 2.518802  | 0.213095  | 0.586871  |
|          | C | 3.197169  | -0.042218 | 1.870714  |
|          | C | 2.279283  | -0.477301 | 3.005977  |
|          | H | 2.865794  | -0.622586 | 3.914437  |
|          | H | 1.519605  | 0.279154  | 3.214133  |
|          | H | 1.780847  | -1.422542 | 2.776984  |
|          | H | 3.956080  | -0.807082 | 1.660594  |
|          | H | 3.740744  | 0.878033  | 2.118580  |
| TSII→III | U | 0.535063  | 0.391800  | -0.912659 |
|          | H | 0.903443  | 1.063782  | 0.944513  |
|          | N | 2.654086  | 0.395473  | -0.672303 |
|          | C | 2.431071  | 0.187208  | 0.531188  |
|          | C | 3.133375  | 0.041799  | 1.821526  |
|          | C | 2.279771  | -0.461855 | 2.973472  |
|          | H | 2.878779  | -0.518719 | 3.883788  |
|          | H | 1.440872  | 0.211753  | 3.165071  |
|          | H | 1.886119  | -1.461034 | 2.770692  |
|          | H | 3.983836  | -0.622842 | 1.625970  |
|          | H | 3.564479  | 1.026229  | 2.047531  |
| III      | U | 0.393780  | -0.162551 | 0.135203  |
|          | H | 4.198801  | 0.367590  | -0.852257 |
|          | N | 2.438633  | -0.184318 | 0.028963  |
|          | C | 3.711832  | -0.193650 | -0.042893 |
|          | C | 4.624941  | -0.907537 | 0.884331  |
|          | C | 3.974784  | -1.687750 | 2.007634  |
|          | H | 4.736232  | -2.169808 | 2.623057  |
|          | H | 3.387209  | -1.034835 | 2.658878  |
|          | H | 3.317000  | -2.470906 | 1.620778  |
|          | H | 5.259539  | -1.549184 | 0.254008  |
|          | H | 5.327212  | -0.150075 | 1.264834  |
| TSIII→IV | U | 2.953364  | -2.145451 | -0.129806 |
|          | H | 3.960367  | 1.095169  | 0.042270  |
|          | N | 3.532198  | -0.496757 | -1.354232 |
|          | C | 3.678401  | 0.092376  | -0.265077 |
|          | C | 4.479496  | -1.019549 | 1.307386  |
|          | C | 3.607936  | -1.304370 | 2.512713  |
|          | H | 4.137420  | -1.842784 | 3.303279  |
|          | H | 3.199006  | -0.380954 | 2.924812  |
|          | H | 2.717663  | -1.952808 | 2.304010  |
|          | H | 5.143135  | -1.882879 | 1.028851  |
|          | H | 5.161300  | -0.187966 | 1.470816  |
| IV       | U | 2.838734  | -1.242207 | -0.246677 |
|          | H | 3.454295  | 2.090682  | 0.696908  |
|          | N | 4.000815  | 0.643139  | -0.815319 |
|          | C | 3.474258  | 1.144631  | 0.153905  |
|          | C | 4.494444  | -2.271434 | 1.000547  |
|          | C | 3.703333  | -1.962460 | 2.262899  |
|          | H | 4.281097  | -1.469684 | 3.047177  |
|          | H | 2.866762  | -1.204573 | 2.103508  |
|          | H | 3.206698  | -2.834874 | 2.694189  |
|          | H | 4.623448  | -3.347534 | 0.839889  |
|          | H | 5.478270  | -1.794719 | 0.985968  |

|                                                  |   |           |           |           |
|--------------------------------------------------|---|-----------|-----------|-----------|
| HCN                                              | C | 0.000000  | 0.000000  | -0.497856 |
|                                                  | H | 0.000000  | 0.000000  | -1.566083 |
|                                                  | N | -0.000000 | -0.000000 | 0.650460  |
| [UCH <sub>2</sub> CH <sub>3</sub> ] <sup>+</sup> | U | 2.854953  | -1.363659 | -0.248048 |
|                                                  | C | 4.607200  | -2.071516 | 1.006094  |
|                                                  | C | 3.668381  | -1.935105 | 2.214754  |
|                                                  | H | 4.151224  | -2.176959 | 3.164985  |
|                                                  | H | 3.284598  | -0.902384 | 2.355508  |
|                                                  | H | 2.789568  | -2.609488 | 2.164034  |
|                                                  | H | 4.957017  | -3.102382 | 0.880047  |
|                                                  | H | 5.475784  | -1.408495 | 1.093917  |

Table 3.3: [UH]<sup>+</sup> + CH<sub>3</sub>CH<sub>2</sub>CN B3LYP/SDD/6-311+g(d,p) Singlet Spin Energies (Hartree)

| Structure                                                  | E0         | E_ZPE  | E_tot  | H_corr | G_corr  | E0+E_ZPE   | E0+E_tot   | E0+H_corr  | E0+G_corr  |
|------------------------------------------------------------|------------|--------|--------|--------|---------|------------|------------|------------|------------|
| [UH] <sup>+</sup>                                          | -477.13768 | .00368 | .00605 | .00699 | -.01769 | -477.13400 | -477.13164 | -477.13069 | -477.15538 |
| CH <sub>3</sub> CH <sub>2</sub> CN                         | -172.12044 | .07406 | .07874 | .07968 | .04736  | -172.04639 | -172.04171 | -172.04076 | -172.07308 |
| [UH] <sup>+</sup> + CH <sub>3</sub> CH <sub>2</sub> CN (I) | -649.25813 | .07774 | .08479 | .08667 | .02967  | -649.18039 | -649.17334 | -649.17146 | -649.22846 |
| II                                                         | -649.35711 | .07857 | .08584 | .08679 | .04401  | -649.27854 | -649.27127 | -649.27032 | -649.31310 |
| TSII→III                                                   | -649.33619 | .07953 | .08575 | .08669 | .04700  | -649.25666 | -649.25044 | -649.24949 | -649.28919 |
| III                                                        | -649.36013 | .08525 | .09194 | .09288 | .05167  | -649.27488 | -649.26819 | -649.26725 | -649.30846 |
| TSIII→IV                                                   | -649.33196 | .08090 | .08695 | .08790 | .04911  | -649.25105 | -649.24500 | -649.24406 | -649.28285 |
| IV                                                         | -649.36754 | .07908 | .08686 | .08780 | .04408  | -649.28846 | -649.28069 | -649.27974 | -649.32346 |
| [UCH <sub>2</sub> CH <sub>3</sub> ] <sup>+</sup>           | -555.81767 | .06084 | .06601 | .06695 | .03009  | -555.75683 | -555.75166 | -555.75072 | -555.78758 |
| HCN                                                        | -93.45449  | .01636 | .01890 | .01985 | -.00300 | -93.43813  | -93.43559  | -93.43465  | -93.45749  |
| [UCH <sub>2</sub> CH <sub>3</sub> ] <sup>+</sup> + HCN (V) | -649.27216 | .07720 | .08491 | .08680 | .02710  | -649.19496 | -649.18725 | -649.18537 | -649.24507 |

Table 3.3.1: [UH]<sup>+</sup> + CH<sub>3</sub>CH<sub>2</sub>CN B3LYP/SDD/6-311+g(d,p) Singlet Spin Structure Coordinates

| Structure                          | Coordinates |           |           |           |
|------------------------------------|-------------|-----------|-----------|-----------|
| [UH] <sup>+</sup>                  | U           | -0.274048 | 0.000897  | -0.010869 |
|                                    | H           | -0.723542 | 1.193481  | 1.458793  |
| CH <sub>3</sub> CH <sub>2</sub> CN | C           | -1.429488 | 0.666866  | 0.304718  |
|                                    | C           | -0.038681 | 0.098523  | -0.027641 |
|                                    | C           | 1.032188  | 1.075832  | 0.161780  |
|                                    | N           | 1.866229  | 1.857431  | 0.315500  |
|                                    | H           | -1.665097 | 1.520854  | -0.332711 |
|                                    | H           | -1.479887 | 0.992900  | 1.345047  |
|                                    | H           | 0.181016  | -0.770291 | 0.600286  |
|                                    | H           | -0.002845 | -0.246048 | -1.065624 |
| II                                 | H           | -2.188892 | -0.101524 | 0.146757  |
|                                    | U           | 0.598767  | 0.072643  | -0.907251 |
|                                    | H           | -0.329118 | 1.624950  | -0.137970 |
|                                    | N           | 2.486033  | 0.586646  | -0.514397 |
|                                    | C           | 2.230856  | 0.086961  | 0.644531  |
|                                    | C           | 3.064623  | -0.001726 | 1.869371  |
|                                    | C           | 2.359039  | -0.579512 | 3.098234  |
|                                    | H           | 3.046070  | -0.610120 | 3.945046  |
|                                    | H           | 1.502050  | 0.032631  | 3.388055  |
|                                    | H           | 2.011494  | -1.599397 | 2.916304  |
|                                    | H           | 3.946033  | -0.600137 | 1.598824  |

|                                                  |   |           |           |           |
|--------------------------------------------------|---|-----------|-----------|-----------|
|                                                  | H | 3.452603  | 1.006533  | 2.064135  |
| TSII→III                                         | U | -0.346346 | 1.002889  | 0.267431  |
|                                                  | H | 1.328271  | 1.848144  | 0.934467  |
|                                                  | N | 1.035381  | -0.326862 | 0.243201  |
|                                                  | C | 1.355495  | 0.356600  | 1.381390  |
|                                                  | C | 2.512537  | 0.101086  | 2.282759  |
|                                                  | C | 2.431603  | -1.301361 | 2.914678  |
|                                                  | H | 3.296071  | -1.455032 | 3.562123  |
|                                                  | H | 1.531789  | -1.413771 | 3.523977  |
|                                                  | H | 2.433739  | -2.077866 | 2.148338  |
|                                                  | H | 3.433093  | 0.185713  | 1.693477  |
|                                                  | H | 2.544281  | 0.870320  | 3.058020  |
| III                                              | U | 0.493997  | 0.195364  | 0.419777  |
|                                                  | H | 4.162430  | 0.367946  | -0.848798 |
|                                                  | N | 2.428387  | -0.214112 | 0.065561  |
|                                                  | C | 3.708769  | -0.203915 | -0.030652 |
|                                                  | C | 4.659229  | -0.925029 | 0.862140  |
|                                                  | C | 4.060175  | -1.712510 | 2.020849  |
|                                                  | H | 4.852303  | -2.206169 | 2.585432  |
|                                                  | H | 3.521115  | -1.058620 | 2.711589  |
|                                                  | H | 3.371737  | -2.483118 | 1.667526  |
|                                                  | H | 5.253085  | -1.574063 | 0.199626  |
|                                                  | H | 5.388739  | -0.178802 | 1.209486  |
| TSIII→IV                                         | U | 2.914264  | -2.033124 | -0.247181 |
|                                                  | H | 3.811184  | 1.031537  | 0.055324  |
|                                                  | N | 3.726374  | -0.658712 | -1.310932 |
|                                                  | C | 3.552630  | -0.008016 | -0.107982 |
|                                                  | C | 4.453290  | -0.995537 | 1.271879  |
|                                                  | C | 3.640208  | -1.264535 | 2.530724  |
|                                                  | H | 4.216308  | -1.789182 | 3.295949  |
|                                                  | H | 3.262604  | -0.331984 | 2.951929  |
|                                                  | H | 2.735818  | -1.896596 | 2.367035  |
|                                                  | H | 5.069016  | -1.874071 | 0.928666  |
|                                                  | H | 5.188591  | -0.205752 | 1.409609  |
| IV                                               | U | 2.703057  | -0.653209 | 0.299587  |
|                                                  | H | 4.205174  | 2.241993  | -0.317110 |
|                                                  | N | 3.616619  | 0.397616  | -1.177042 |
|                                                  | C | 3.725286  | 1.265418  | -0.240779 |
|                                                  | C | 4.428573  | -1.811747 | 1.266835  |
|                                                  | C | 3.594010  | -2.406132 | 2.407142  |
|                                                  | H | 4.098181  | -2.365951 | 3.374879  |
|                                                  | H | 2.641273  | -1.842225 | 2.601611  |
|                                                  | H | 3.289188  | -3.437833 | 2.220192  |
|                                                  | H | 4.955510  | -2.559871 | 0.667751  |
|                                                  | H | 5.165285  | -1.077094 | 1.619925  |
| HCN                                              | C | 0.000000  | 0.000000  | -0.498334 |
|                                                  | H | 0.000000  | 0.000000  | -1.564845 |
|                                                  | N | -0.000000 | 0.000000  | 0.650693  |
| [UCH <sub>2</sub> CH <sub>3</sub> ] <sup>+</sup> | U | 2.877133  | -1.366789 | -0.279487 |
|                                                  | C | 4.601124  | -2.070055 | 1.009579  |
|                                                  | C | 3.662676  | -1.935256 | 2.232318  |
|                                                  | H | 4.159545  | -2.181387 | 3.173505  |
|                                                  | H | 3.281012  | -0.904941 | 2.369694  |
|                                                  | H | 2.786891  | -2.608183 | 2.177613  |
|                                                  | H | 4.951609  | -3.096820 | 0.867941  |
|                                                  | H | 5.468735  | -1.406557 | 1.080128  |

Table 3.4:  $[\text{UH}]^+ + \text{CH}_3\text{CH}_2\text{CN}$  PBE1PBE/SDD/6-311+g(d,p) Singlet Spin Energies (Hartree)

| Structure                                             | E0         | E_ZPE  | E_tot  | H_corr | G_corr  | E0+E_ZPE   | E0+E_tot   | E0+H_corr  | E0+G_corr  |
|-------------------------------------------------------|------------|--------|--------|--------|---------|------------|------------|------------|------------|
| $[\text{UH}]^+$                                       | -477.01929 | .00372 | .00608 | .00703 | -.01765 | -477.01557 | -477.01321 | -477.01226 | -477.03694 |
| $\text{CH}_3\text{CH}_2\text{CN}$                     | -171.90168 | .07452 | .07919 | .08013 | .04785  | -171.82716 | -171.82249 | -171.82155 | -171.85383 |
| $[\text{UH}]^+ + \text{CH}_3\text{CH}_2\text{CN}$ (I) | -648.92096 | .07824 | .08527 | .08716 | .03020  | -648.84273 | -648.83569 | -648.83381 | -648.89076 |
| II                                                    | -649.04193 | .07910 | .08637 | .08731 | .04471  | -648.96283 | -648.95556 | -648.95462 | -648.99722 |
| TSII→III                                              | -649.02823 | .08023 | .08640 | .08734 | .04775  | -648.94800 | -648.94183 | -648.94089 | -648.98048 |
| III                                                   | -649.03462 | .08571 | .09239 | .09333 | .05207  | -648.94891 | -648.94223 | -648.94129 | -648.98256 |
| TSIII→IV                                              | -649.02556 | .08138 | .08737 | .08831 | .04963  | -648.94418 | -648.93820 | -648.93725 | -648.97594 |
| IV                                                    | -649.05726 | .08048 | .08764 | .08858 | .04719  | -648.97678 | -648.96962 | -648.96868 | -649.01008 |
| $[\text{UCH}_2\text{CH}_3]^+$                         | -555.60359 | .06123 | .06602 | .06696 | .03182  | -555.54235 | -555.53757 | -555.53663 | -555.57177 |
| HCN                                                   | -93.33544  | .01649 | .01903 | .01997 | -.00287 | -93.31895  | -93.31641  | -93.31547  | -93.33831  |
| $[\text{UCH}_2\text{CH}_3]^+ + \text{HCN}$ (V)        | -648.93903 | .07773 | .08504 | .08693 | .02895  | -648.86130 | -648.85399 | -648.85210 | -648.91008 |

Table 3.4.1:  $[\text{UH}]^+ + \text{CH}_3\text{CH}_2\text{CN}$  PBE1PBE/SDD/6-311+g(d,p) Singlet Spin Structure Coordinates

| Structure                         | Coordinates |           |           |           |
|-----------------------------------|-------------|-----------|-----------|-----------|
| $[\text{UH}]^+$                   | U           | -0.274832 | 0.002976  | -0.008307 |
|                                   | H           | -0.722758 | 1.191402  | 1.456231  |
| $\text{CH}_3\text{CH}_2\text{CN}$ | C           | -1.423276 | 0.666142  | 0.303808  |
|                                   | C           | -0.042260 | 0.099303  | -0.026986 |
|                                   | C           | 1.023045  | 1.073641  | 0.162122  |
|                                   | N           | 1.855821  | 1.855504  | 0.315992  |
|                                   | H           | -1.657991 | 1.521138  | -0.333377 |
|                                   | H           | -1.472810 | 0.993170  | 1.344342  |
|                                   | H           | 0.180748  | -0.769399 | 0.600941  |
|                                   | H           | -0.003160 | -0.244935 | -1.065573 |
|                                   | H           | -2.185573 | -0.100020 | 0.146843  |
| II                                | U           | 0.632750  | 0.065869  | -0.885759 |
|                                   | H           | -0.262154 | 1.571430  | -0.023287 |
|                                   | N           | 2.498777  | 0.574248  | -0.527023 |
|                                   | C           | 2.219983  | 0.081878  | 0.637701  |
|                                   | C           | 3.048886  | 0.002983  | 1.856436  |
|                                   | C           | 2.345544  | -0.566164 | 3.079324  |
|                                   | H           | 3.028150  | -0.589240 | 3.930521  |
|                                   | H           | 1.484493  | 0.044510  | 3.361859  |
|                                   | H           | 2.002515  | -1.589141 | 2.903550  |
|                                   | H           | 3.934697  | -0.591245 | 1.588656  |
|                                   | H           | 3.434810  | 1.014345  | 2.042905  |
| TSII→III                          | U           | -0.313079 | 0.984431  | 0.289687  |
|                                   | H           | 1.324616  | 1.868205  | 0.908122  |
|                                   | N           | 1.040722  | -0.343274 | 0.262124  |
|                                   | C           | 1.353112  | 0.354265  | 1.395704  |
|                                   | C           | 2.508282  | 0.101531  | 2.287844  |
|                                   | C           | 2.427588  | -1.296307 | 2.906238  |
|                                   | H           | 3.293674  | -1.458754 | 3.550073  |
|                                   | H           | 1.529486  | -1.412195 | 3.518301  |
|                                   | H           | 2.424762  | -2.067194 | 2.133262  |
|                                   | H           | 3.425469  | 0.190070  | 1.692908  |

|                                                  |   |           |           |           |
|--------------------------------------------------|---|-----------|-----------|-----------|
|                                                  | H | 2.541282  | 0.869082  | 3.065599  |
| III                                              | U | 0.571262  | 0.198405  | 0.513233  |
|                                                  | H | 4.165554  | 0.378905  | -0.844641 |
|                                                  | N | 2.435160  | -0.264122 | 0.035512  |
|                                                  | C | 3.716217  | -0.212481 | -0.037790 |
|                                                  | C | 4.656102  | -0.919439 | 0.863598  |
|                                                  | C | 4.042238  | -1.707089 | 2.002228  |
|                                                  | H | 4.822727  | -2.202180 | 2.582315  |
|                                                  | H | 3.489705  | -1.054224 | 2.685242  |
|                                                  | H | 3.359697  | -2.476771 | 1.633942  |
|                                                  | H | 5.263693  | -1.564022 | 0.207880  |
|                                                  | H | 5.377610  | -0.170012 | 1.221020  |
| TSIII→IV                                         | U | 2.981737  | -2.014129 | -0.213396 |
|                                                  | H | 3.829856  | 1.034640  | 0.072496  |
|                                                  | N | 3.744088  | -0.649580 | -1.294750 |
|                                                  | C | 3.561979  | -0.004028 | -0.093428 |
|                                                  | C | 4.469828  | -0.999787 | 1.282555  |
|                                                  | C | 3.615532  | -1.278517 | 2.500585  |
|                                                  | H | 4.115828  | -1.902282 | 3.244702  |
|                                                  | H | 3.299574  | -0.346978 | 2.972837  |
|                                                  | H | 2.652787  | -1.806765 | 2.277387  |
|                                                  | H | 5.116604  | -1.868890 | 0.963855  |
|                                                  | H | 5.182472  | -0.189658 | 1.432179  |
| IV                                               | U | 3.049581  | -1.197392 | -0.276829 |
|                                                  | H | 3.322234  | 1.926366  | 0.627532  |
|                                                  | N | 4.002098  | 0.485663  | -0.768723 |
|                                                  | C | 3.309097  | 0.908924  | 0.232893  |
|                                                  | C | 4.632433  | -2.127836 | 1.062911  |
|                                                  | C | 3.626773  | -1.956007 | 2.195976  |
|                                                  | H | 4.085273  | -1.755084 | 3.167467  |
|                                                  | H | 3.002189  | -1.023200 | 2.069907  |
|                                                  | H | 2.949203  | -2.809635 | 2.319884  |
|                                                  | H | 4.908269  | -3.173075 | 0.890270  |
|                                                  | H | 5.535005  | -1.527758 | 1.201705  |
| HCN                                              | C | 0.000000  | 0.000000  | -0.497856 |
|                                                  | H | 0.000000  | 0.000000  | -1.566083 |
|                                                  | N | -0.000000 | -0.000000 | 0.650460  |
| [UCH <sub>2</sub> CH <sub>3</sub> ] <sup>+</sup> | U | 2.827585  | -1.387547 | -0.137334 |
|                                                  | C | 4.628725  | -2.075961 | 1.010431  |
|                                                  | C | 3.674085  | -1.932058 | 2.202154  |
|                                                  | H | 4.109644  | -2.182967 | 3.171679  |
|                                                  | H | 3.299304  | -0.888206 | 2.317781  |
|                                                  | H | 2.781335  | -2.593681 | 2.108924  |
|                                                  | H | 4.977594  | -3.104166 | 0.875530  |
|                                                  | H | 5.490453  | -1.405402 | 1.082126  |

Table 3.5: [UH]<sup>+</sup> + CH<sub>3</sub>CH<sub>2</sub>CN B3LYP/SDD/6-311+g(d,p) Triplet Spin Energies (Hartree)

| Structure                                                  | E0         | E_ZPE  | E_tot  | H_corr | G_corr  | E0+E_ZPE   | E0+E_tot   | E0+H_corr  | E0+G_corr  |
|------------------------------------------------------------|------------|--------|--------|--------|---------|------------|------------|------------|------------|
| [UH] <sup>+</sup>                                          | -477.14828 | .00361 | .00597 | .00691 | -.01880 | -477.14467 | -477.14231 | -477.14136 | -477.16708 |
| CH <sub>3</sub> CH <sub>2</sub> CN                         | -172.12044 | .07406 | .07874 | .07968 | .04736  | -172.04639 | -172.04171 | -172.04076 | -172.07308 |
| [UH] <sup>+</sup> + CH <sub>3</sub> CH <sub>2</sub> CN (I) | -649.26872 | .07766 | .08471 | .08660 | .02857  | -649.19106 | -649.18401 | -649.18213 | -649.24016 |
| II                                                         | -649.40316 | .07814 | .08570 | .08665 | .04229  | -649.32503 | -649.31746 | -649.31652 | -649.36088 |
| TSII→III                                                   | -649.38313 | .07880 | .08524 | .08618 | .04486  | -649.30433 | -649.29790 | -649.29695 | -649.33827 |
| III                                                        | -649.43703 | .08539 | .09208 | .09303 | .05073  | -649.35164 | -649.34494 | -649.34400 | -649.38630 |
| TSIII→IV                                                   | -649.37777 | .08053 | .08680 | .08775 | .04751  | -649.29724 | -649.29097 | -649.29003 | -649.33027 |
| IV                                                         | -649.40933 | .07891 | .08680 | .08775 | .04245  | -649.33042 | -649.32253 | -649.32158 | -649.36688 |
| [UCH <sub>2</sub> CH <sub>3</sub> ] <sup>+</sup>           | -93.45449  | .01636 | .01890 | .01985 | -.00300 | -93.43813  | -93.43559  | -93.43465  | -93.45749  |
| HCN                                                        | -555.89760 | .06115 | .06613 | .06708 | .03009  | -555.83645 | -555.83146 | -555.83052 | -555.86751 |
| [UCH <sub>2</sub> CH <sub>3</sub> ] <sup>+</sup> + HCN (V) | -649.35209 | .07751 | .08504 | .08692 | .02709  | -649.27458 | -649.26706 | -649.26517 | -649.32500 |

Table 3.5.1: [UH]<sup>+</sup> + CH<sub>3</sub>CH<sub>2</sub>CN B3LYP/SDD/6-311+g(d,p) Triplet Spin Structure Coordinates

| Structure                          | Coordinates |           |           |           |
|------------------------------------|-------------|-----------|-----------|-----------|
| [UH] <sup>+</sup>                  | U           | -0.275143 | 0.003800  | -0.007291 |
|                                    | H           | -0.722447 | 1.190578  | 1.455215  |
| CH <sub>3</sub> CH <sub>2</sub> CN | C           | -1.429488 | 0.666866  | 0.304718  |
|                                    | C           | -0.038681 | 0.098523  | -0.027641 |
|                                    | C           | 1.032188  | 1.075832  | 0.161780  |
|                                    | N           | 1.866229  | 1.857431  | 0.315500  |
|                                    | H           | -1.665097 | 1.520854  | -0.332711 |
|                                    | H           | -1.479887 | 0.992900  | 1.345047  |
|                                    | H           | 0.181016  | -0.770291 | 0.600286  |
|                                    | H           | -0.002845 | -0.246048 | -1.065624 |
|                                    | H           | -2.188892 | -0.101524 | 0.146757  |
| II                                 | U           | 0.349455  | 0.098990  | -0.822241 |
|                                    | H           | -0.188974 | 1.952749  | -0.335943 |
|                                    | N           | 2.447851  | 0.237442  | -0.559730 |
|                                    | C           | 2.250597  | 0.068126  | 0.658403  |
|                                    | C           | 3.066322  | 0.041319  | 1.901700  |
|                                    | C           | 2.402172  | -0.635402 | 3.103455  |
|                                    | H           | 3.065341  | -0.586808 | 3.968100  |
|                                    | H           | 1.466410  | -0.140368 | 3.372740  |
|                                    | H           | 2.195905  | -1.689382 | 2.903884  |
|                                    | H           | 4.028154  | -0.422200 | 1.651983  |
| TSII→III                           | U           | 0.640746  | 0.340191  | -1.005174 |
|                                    | H           | 0.952228  | 0.958791  | 0.904491  |
|                                    | N           | 2.642240  | 0.542905  | -0.655116 |
|                                    | C           | 2.322435  | 0.196916  | 0.548087  |
|                                    | C           | 3.094807  | 0.040295  | 1.809880  |
|                                    | C           | 2.286871  | -0.450433 | 3.011713  |
|                                    | H           | 2.933300  | -0.541849 | 3.885664  |
|                                    | H           | 1.485655  | 0.248844  | 3.263313  |
|                                    | H           | 1.844155  | -1.431141 | 2.821121  |
|                                    | H           | 3.910387  | -0.653374 | 1.572173  |

|                                                  |   |           |           |           |
|--------------------------------------------------|---|-----------|-----------|-----------|
|                                                  | H | 3.578071  | 1.002449  | 2.022638  |
| III                                              | U | 0.408420  | 0.061077  | 0.350912  |
|                                                  | H | 4.189702  | 0.369194  | -0.848300 |
|                                                  | N | 2.457331  | -0.091177 | 0.137965  |
|                                                  | C | 3.723938  | -0.169434 | -0.012397 |
|                                                  | C | 4.666829  | -0.938246 | 0.853486  |
|                                                  | C | 4.061140  | -1.700586 | 2.025264  |
|                                                  | H | 4.844465  | -2.219596 | 2.579505  |
|                                                  | H | 3.553548  | -1.027467 | 2.720620  |
|                                                  | H | 3.342821  | -2.450845 | 1.685587  |
|                                                  | H | 5.223359  | -1.607211 | 0.180344  |
|                                                  | H | 5.428411  | -0.218736 | 1.189552  |
| TSIII→IV                                         | U | 2.915633  | -2.086607 | -0.233250 |
|                                                  | H | 3.873063  | 1.066924  | 0.083831  |
|                                                  | N | 3.677109  | -0.559426 | -1.329205 |
|                                                  | C | 3.638559  | 0.037711  | -0.166348 |
|                                                  | C | 4.470078  | -1.009409 | 1.290208  |
|                                                  | C | 3.612975  | -1.284753 | 2.517450  |
|                                                  | H | 4.163851  | -1.804909 | 3.304126  |
|                                                  | H | 3.208499  | -0.357382 | 2.924719  |
|                                                  | H | 2.724779  | -1.934000 | 2.325302  |
|                                                  | H | 5.097699  | -1.884183 | 0.973276  |
|                                                  | H | 5.188042  | -0.209939 | 1.454913  |
| IV                                               | U | 3.002870  | -1.157141 | -0.241849 |
|                                                  | H | 3.412537  | 2.162370  | 0.341095  |
|                                                  | N | 4.039986  | 0.559771  | -0.892472 |
|                                                  | C | 3.389306  | 1.115654  | 0.028509  |
|                                                  | C | 4.602100  | -2.132255 | 1.122646  |
|                                                  | C | 3.603753  | -2.070896 | 2.291272  |
|                                                  | H | 4.075302  | -1.904822 | 3.262202  |
|                                                  | H | 2.902726  | -1.192347 | 2.226511  |
|                                                  | H | 2.978458  | -2.965868 | 2.378028  |
|                                                  | H | 4.931516  | -3.152892 | 0.907577  |
|                                                  | H | 5.483601  | -1.510607 | 1.299474  |
| HCN                                              | C | 0.000000  | 0.000000  | -0.498334 |
|                                                  | H | 0.000000  | 0.000000  | -1.564845 |
|                                                  | N | -0.000000 | 0.000000  | 0.650693  |
| [UCH <sub>2</sub> CH <sub>3</sub> ] <sup>+</sup> | U | 3.095756  | -0.949841 | -0.322578 |
|                                                  | C | 4.538012  | -2.139912 | 1.006418  |
|                                                  | C | 3.664389  | -1.987371 | 2.261230  |
|                                                  | H | 4.234844  | -1.750027 | 3.160914  |
|                                                  | H | 2.938495  | -1.129671 | 2.196152  |
|                                                  | H | 3.048526  | -2.867315 | 2.457492  |
|                                                  | H | 4.793714  | -3.178042 | 0.780769  |
|                                                  | H | 5.474989  | -1.567808 | 1.090894  |

Table 3.5: [UH]<sup>+</sup> + CH<sub>3</sub>CH<sub>2</sub>CN PBE1PBE/SDD/6-311+g(d,p) Triplet Spin Energies (Hartree)

| Structure                                                  | E0         | E_ZPE  | E_tot  | H_corr | G_corr  | E0+E_ZPE   | E0+E_tot   | E0+H_corr  | E0+G_corr  |
|------------------------------------------------------------|------------|--------|--------|--------|---------|------------|------------|------------|------------|
| [UH] <sup>+</sup>                                          | -477.06589 | .00353 | .00589 | .00684 | -.01891 | -477.06236 | -477.06000 | -477.05905 | -477.08480 |
| CH <sub>3</sub> CH <sub>2</sub> CN                         | -171.90168 | .07452 | .07919 | .08013 | .04785  | -171.82716 | -171.82249 | -171.82155 | -171.85383 |
| [UH] <sup>+</sup> + CH <sub>3</sub> CH <sub>2</sub> CN (I) | -648.96757 | .07805 | .08508 | .08697 | .02894  | -648.88952 | -648.88249 | -648.88060 | -648.93862 |
| II                                                         | -649.08904 | .07852 | .08611 | .08705 | .04212  | -649.01052 | -649.00293 | -649.00199 | -649.04692 |
| TSII→III                                                   | -649.07639 | .07930 | .08572 | .08666 | .04541  | -648.99709 | -648.99067 | -648.98972 | -649.03098 |
| III                                                        | -649.11984 | .08588 | .09257 | .09352 | .05116  | -649.03396 | -649.02727 | -649.02632 | -649.06868 |
| TSIII→IV                                                   | -649.07275 | .08086 | .08713 | .08807 | .04779  | -648.99189 | -648.98562 | -648.98467 | -649.02496 |
| IV                                                         | -649.09929 | .08013 | .08753 | .08848 | .04504  | -649.01915 | -649.01175 | -649.01081 | -649.05424 |
| [UCH <sub>2</sub> CH <sub>3</sub> ] <sup>+</sup>           | -93.33544  | .01649 | .01903 | .01997 | -.00287 | -93.31895  | -93.31641  | -93.31547  | -93.33831  |
| HCN                                                        | -555.67186 | .06176 | .06654 | .06749 | .03110  | -555.61010 | -555.60532 | -555.60438 | -555.64077 |
| [UCH <sub>2</sub> CH <sub>3</sub> ] <sup>+</sup> + HCN (V) | -649.00730 | .07826 | .08557 | .08746 | .02823  | -648.92905 | -648.92174 | -648.91985 | -648.97907 |

Table 3.6.1: [UH]<sup>+</sup> + CH<sub>3</sub>CH<sub>2</sub>CN PBE1PBE/SDD/6-311+g(d,p) Triplet Spin Structure Coordinates

| Structure                          | Coordinates |           |           |           |
|------------------------------------|-------------|-----------|-----------|-----------|
| [UH] <sup>+</sup>                  | U           | -0.280565 | 0.018185  | 0.010435  |
|                                    | H           | -0.735512 | 1.225240  | 1.497931  |
| CH <sub>3</sub> CH <sub>2</sub> CN | C           | -1.423276 | 0.666142  | 0.303808  |
|                                    | C           | -0.042260 | 0.099303  | -0.026986 |
|                                    | C           | 1.023045  | 1.073641  | 0.162122  |
|                                    | N           | 1.855821  | 1.855504  | 0.315992  |
|                                    | H           | -1.657991 | 1.521138  | -0.333377 |
|                                    | H           | -1.472810 | 0.993170  | 1.344342  |
|                                    | H           | 0.180748  | -0.769399 | 0.600941  |
|                                    | H           | -0.003160 | -0.244935 | -1.065573 |
|                                    | H           | -2.185573 | -0.100020 | 0.146843  |
| II                                 | U           | 0.460061  | 0.069833  | -0.837516 |
|                                    | H           | -0.225840 | 1.786545  | -0.146943 |
|                                    | N           | 2.491036  | 0.367882  | -0.556875 |
|                                    | C           | 2.256818  | 0.077607  | 0.642652  |
|                                    | C           | 3.064472  | 0.021631  | 1.879707  |
|                                    | C           | 2.369843  | -0.598795 | 3.081928  |
|                                    | H           | 3.031465  | -0.576799 | 3.949467  |
|                                    | H           | 1.461527  | -0.050304 | 3.343593  |
|                                    | H           | 2.105770  | -1.643001 | 2.896047  |
|                                    | H           | 3.999063  | -0.497799 | 1.630616  |
|                                    | H           | 3.354235  | 1.062671  | 2.082208  |
| TSII→III                           | U           | 0.646741  | 0.283168  | -0.946509 |
|                                    | H           | 0.892028  | 0.932318  | 0.929220  |
|                                    | N           | 2.622197  | 0.583004  | -0.643524 |
|                                    | C           | 2.318167  | 0.192769  | 0.550819  |
|                                    | C           | 3.096580  | 0.050708  | 1.800312  |
|                                    | C           | 2.304164  | -0.449059 | 2.997208  |
|                                    | H           | 2.951248  | -0.528614 | 3.872347  |
|                                    | H           | 1.490732  | 0.237348  | 3.247585  |
|                                    | H           | 1.877431  | -1.437850 | 2.809108  |
|                                    | H           | 3.922283  | -0.630242 | 1.556008  |

|                                                  |   |           |           |           |
|--------------------------------------------------|---|-----------|-----------|-----------|
|                                                  | H | 3.569326  | 1.020045  | 2.006215  |
| III                                              | U | 0.395966  | -0.164183 | 0.135160  |
|                                                  | H | 4.198425  | 0.367402  | -0.852746 |
|                                                  | N | 2.438335  | -0.184672 | 0.028744  |
|                                                  | C | 3.711910  | -0.193767 | -0.043238 |
|                                                  | C | 4.624830  | -0.907437 | 0.884299  |
|                                                  | C | 3.974512  | -1.687236 | 2.007793  |
|                                                  | H | 4.735843  | -2.169116 | 2.623511  |
|                                                  | H | 3.386825  | -1.034089 | 2.658744  |
|                                                  | H | 3.316706  | -2.470534 | 1.621174  |
|                                                  | H | 5.259468  | -1.549425 | 0.254361  |
|                                                  | H | 5.327143  | -0.149969 | 1.264736  |
| TSIII→IV                                         | U | 2.938433  | -2.047420 | -0.193616 |
|                                                  | H | 3.868525  | 1.064843  | 0.081782  |
|                                                  | N | 3.678043  | -0.570474 | -1.320464 |
|                                                  | C | 3.613221  | 0.036477  | -0.158241 |
|                                                  | C | 4.476140  | -1.021189 | 1.287839  |
|                                                  | C | 3.615109  | -1.288352 | 2.503508  |
|                                                  | H | 4.147193  | -1.822490 | 3.294371  |
|                                                  | H | 3.217732  | -0.357195 | 2.911104  |
|                                                  | H | 2.714638  | -1.924375 | 2.307491  |
|                                                  | H | 5.122183  | -1.892205 | 0.992188  |
|                                                  | H | 5.179070  | -0.203595 | 1.439061  |
| IV                                               | U | 3.137924  | -1.215892 | -0.338424 |
|                                                  | H | 3.183037  | 1.997786  | 0.534949  |
|                                                  | N | 4.165168  | 0.549832  | -0.644389 |
|                                                  | C | 3.282698  | 0.974949  | 0.162236  |
|                                                  | C | 4.638813  | -2.185871 | 1.091931  |
|                                                  | C | 3.619302  | -1.953760 | 2.199336  |
|                                                  | H | 4.052808  | -1.629793 | 3.148163  |
|                                                  | H | 2.923883  | -1.081279 | 1.988570  |
|                                                  | H | 2.981132  | -2.820950 | 2.397224  |
|                                                  | H | 4.865390  | -3.246120 | 0.939578  |
|                                                  | H | 5.572001  | -1.637936 | 1.243817  |
| HCN                                              | C | 0.000000  | 0.000000  | -0.497856 |
|                                                  | H | 0.000000  | 0.000000  | -1.566083 |
|                                                  | N | -0.000000 | -0.000000 | 0.650460  |
| [UCH <sub>2</sub> CH <sub>3</sub> ] <sup>+</sup> | U | 2.870083  | -1.310116 | -0.228967 |
|                                                  | C | 4.610644  | -2.068576 | 1.006147  |
|                                                  | C | 3.665707  | -1.945095 | 2.212143  |
|                                                  | H | 4.161800  | -2.113676 | 3.171049  |
|                                                  | H | 3.225862  | -0.926953 | 2.320006  |
|                                                  | H | 2.827540  | -2.666651 | 2.182124  |
|                                                  | H | 4.930538  | -3.105636 | 0.852918  |
|                                                  | H | 5.496552  | -1.433285 | 1.115870  |

Table 3.7.1: [UH]<sup>+</sup> + CH<sub>3</sub>CH<sub>2</sub>CN B3LYP/SDD/6-311+g(d,p) Quintet Spin Relative Energies (kJ/mol)

| Structure     | E0+E_ZPE |          | E0+H_cor | E0+G_cor |
|---------------|----------|----------|----------|----------|
|               |          |          | r        | r        |
| Reactants (I) | 0        | 0        | 0        | 0        |
| II            | -212.159 | -210.583 | -213.065 | -179.214 |
| TSII→III      | -171.999 | -172.742 | -175.223 | -133.877 |
| III           | -308.189 | -309.294 | -311.776 | -269.754 |
| TSIII→IV      | -158.068 | -159.21  | -161.689 | -117.662 |
| IV            | -215.955 | -213.5   | -215.982 | -181.498 |

|              |          |          |          |          |
|--------------|----------|----------|----------|----------|
| Products (V) | -106.005 | -106.564 | -106.566 | -107.548 |
|--------------|----------|----------|----------|----------|

Table 3.7.2: [UH]<sup>+</sup> + CH<sub>3</sub>CH<sub>2</sub>CN PBE1PBE/SDD/6-311+g(d,p) Quintet Spin Relative Energies (kJ/mol)

| Structure     | EO+E_ZPE | EO+E_tot | EO+H_cor<br>r | EO+G_cor<br>r |
|---------------|----------|----------|---------------|---------------|
| Reactants (I) | 0        | 0        | 0             | 0             |
| II            | -169.914 | -168.702 | -171.18       | -134.846      |
| TSII → III    | -145.421 | -146.873 | -149.352      | -106.204      |
| III           | -265.622 | -266.709 | -269.185      | -227.253      |
| TSIII → IV    | -124.383 | -126.36  | -128.839      | -82.1519      |
| IV            | -179.639 | -177.794 | -180.269      | -143.67       |
| Products (V)  | -43.4205 | -42.1051 | -42.1051      | -47.4428      |

Table 3.7.3: [UH]<sup>+</sup> + CH<sub>3</sub>CH<sub>2</sub>CN B3LYP/SDD/6-311+g(d,p) Singlet Spin Relative Energies (kJ/mol)

| Structure     | EO+E_ZPE | EO+E_tot | EO+H_cor<br>r | EO+G_cor<br>r |
|---------------|----------|----------|---------------|---------------|
| Reactants (I) | 165.1177 | 165.1203 | 165.1177      | 169.1373      |
| II            | -92.5699 | -91.9739 | -94.455       | -53.0876      |
| TSII → III    | -35.1134 | -37.29   | -39.7711      | 9.690721      |
| III           | -82.9553 | -83.9057 | -86.3868      | -40.9027      |
| TSIII → IV    | -20.4054 | -23.0204 | -25.5015      | 26.33114      |
| IV            | -118.617 | -116.706 | -119.187      | -80.2904      |
| Products (V)  | 126.8563 | 128.5996 | 128.597       | 125.5252      |

Table 3.7.4: [UH]<sup>+</sup> + CH<sub>3</sub>CH<sub>2</sub>CN PBE1PBE/SDD/6-311+g(d,p) Singlet Spin Relative Energies (kJ/mol)

| Structure     | EO+E_ZPE | EO+E_tot | EO+H_cor<br>r | EO+G_cor<br>r |
|---------------|----------|----------|---------------|---------------|
| Reactants (I) | 267.1394 | 267.1394 | 267.1394      | 271.1564      |
| II            | -48.2016 | -47.5714 | -50.0499      | -8.33596      |
| TSII → III    | -9.25489 | -11.5233 | -14.0018      | 35.60703      |
| III           | -11.652  | -12.5761 | -15.0546      | 30.15912      |
| TSIII → IV    | 0.764021 | -1.977   | -4.45547      | 47.53468      |
| IV            | -84.8325 | -84.4938 | -86.9697      | -42.0946      |
| Products (V)  | 218.3707 | 219.1137 | 219.1137      | 220.4501      |

Table 3.7.5: [UH]<sup>+</sup> + CH<sub>3</sub>CH<sub>2</sub>CN B3LYP/SDD/6-311+g(d,p) Triplet Spin Relative Energies (kJ/mol)

| Structure     | EO+E_ZPE | EO+E_tot | EO+H_cor<br>r | EO+G_cor<br>r |
|---------------|----------|----------|---------------|---------------|
| Reactants (I) | 137.1036 | 137.1062 | 137.1036      | 138.4216      |
| II            | -214.622 | -213.262 | -215.743      | -178.529      |
| TSII → III    | -160.295 | -161.896 | -164.377      | -119.185      |
| III           | -284.489 | -285.418 | -287.899      | -245.266      |
| TSIII → IV    | -141.667 | -143.707 | -146.188      | -98.1596      |

|              |          |          |          |          |
|--------------|----------|----------|----------|----------|
| IV           | -228.77  | -226.565 | -229.046 | -194.287 |
| Products (V) | -82.1729 | -80.9205 | -80.9205 | -84.3258 |

Table 3.7.6: [UH]<sup>+</sup> + CH<sub>3</sub>CH<sub>2</sub>CN PBE1PBE/SDD/6-311+g(d,p) Triplet Spin Relative Energies (kJ/mol)

| Structure     | E0+E_ZPE | E0+E_tot | E0+H_cor<br>r | E0+G_cor<br>r |
|---------------|----------|----------|---------------|---------------|
| Reactants (I) | 144.2844 | 144.2896 | 144.2896      | 145.5         |
| II            | -173.404 | -171.936 | -174.415      | -138.818      |
| TSII → III    | -138.141 | -139.742 | -142.221      | -96.986       |
| III           | -234.953 | -235.833 | -238.311      | -195.965      |
| TSIII → IV    | -124.499 | -126.486 | -128.965      | -81.1778      |
| IV            | -196.07  | -195.101 | -197.579      | -158.058      |
| Products (V)  | 40.49834 | 41.23611 | 41.23611      | 39.30899      |

Figure 5:  $[\text{UH}]^+ + \text{CH}_3\text{CH}_2\text{CN}$  B3LYP/SDD/6-311+g(d,p) Relative Enthalpy (kJ/mol)

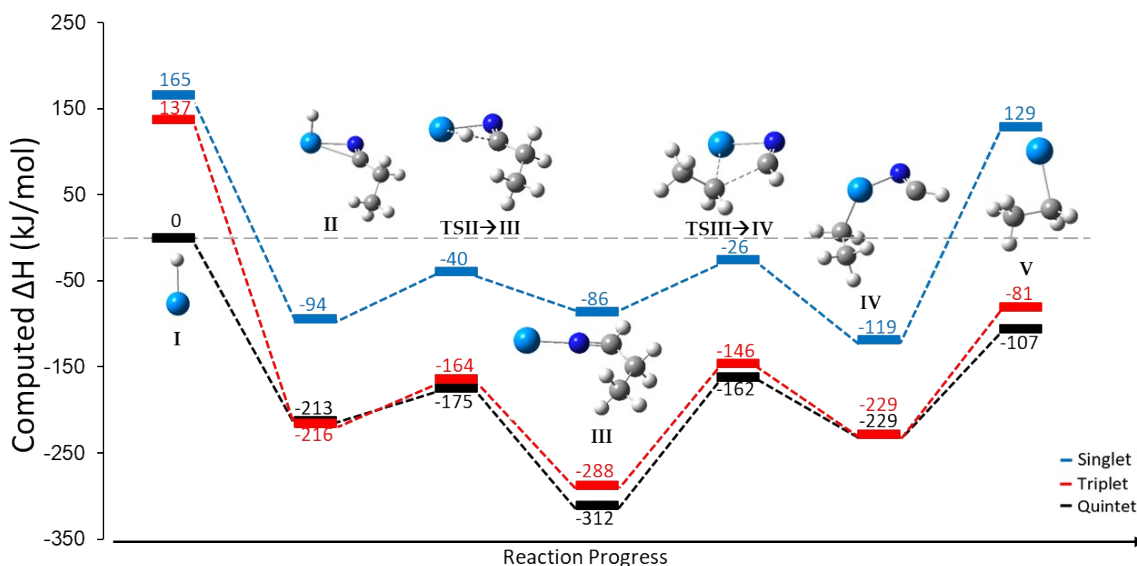

Figure 5.1:  $[\text{UH}]^+ + \text{CH}_3\text{CH}_2\text{CN}$  PBE1PBE/SDD/6-311+g(d,p) Relative Enthalpy (kJ/mol)

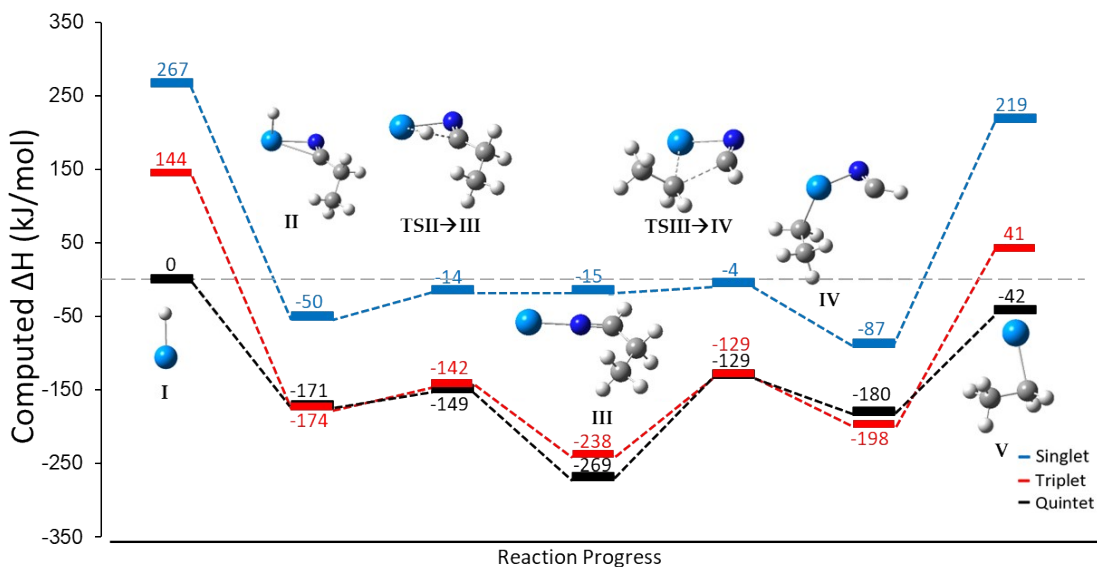

Table 4.1:  $[\text{UH}]^+ + \text{CH}_3\text{CH}_2\text{CH}_2\text{CN}$  B3LYP/SDD/6-311+g(d,p) Quintet Spin Energies (Hartree)

| Structure                                             | E0         | E_ZPE  | E_tot  | H_corr | G_corr  | E0+E_ZPE   | E0+E_tot   | E0+H_corr  | E0+G_corr  |
|-------------------------------------------------------|------------|--------|--------|--------|---------|------------|------------|------------|------------|
| $[\text{UH}]^+$                                       | -477.20060 | .00371 | .00608 | .00702 | -.01919 | -477.19689 | -477.19453 | -477.19358 | -477.21980 |
| $\text{CH}_3\text{CH}_2\text{CH}_2\text{CN}$          | -211.44532 | .10244 | .10841 | .10935 | .07343  | -211.34289 | -211.33691 | -211.33597 | -211.37189 |
| $[\text{UH}]^+ + \text{CH}_3\text{CH}_2\text{CN}$ (I) | -688.64592 | .10615 | .11448 | .11637 | .05424  | -688.53978 | -688.53144 | -688.52955 | -688.59168 |

|                                                                            |            |        |        |        |         |            |            |            |            |
|----------------------------------------------------------------------------|------------|--------|--------|--------|---------|------------|------------|------------|------------|
| II                                                                         | -688.72780 | .10687 | .11576 | .11671 | .06791  | -688.62093 | -688.61204 | -688.61109 | -688.65989 |
| TSII→III                                                                   | -688.70823 | .10706 | .11439 | .11533 | .07156  | -688.60117 | -688.59384 | -688.59290 | -688.63667 |
| III                                                                        | -688.76911 | .11382 | .12176 | .12271 | .07659  | -688.65529 | -688.64735 | -688.64640 | -688.69252 |
| TSIII→IV                                                                   | -688.70619 | .10915 | .11707 | .11801 | .07283  | -688.59705 | -688.58913 | -688.58818 | -688.63337 |
| IV                                                                         | -688.73009 | .10737 | .11628 | .11722 | .07002  | -688.62272 | -688.61381 | -688.61286 | -688.66007 |
| HCN                                                                        | -93.45449  | .01636 | .01890 | .01985 | -.00300 | -93.43813  | -93.43559  | -93.43465  | -93.45749  |
| [UCH <sub>2</sub> CH <sub>2</sub> CH <sub>3</sub> ] <sup>+</sup>           | -595.23373 | .08963 | .09569 | .09663 | .05581  | -595.14409 | -595.13804 | -595.13710 | -595.17792 |
| [UCH <sub>2</sub> CH <sub>2</sub> CH <sub>3</sub> ] <sup>+</sup> + HCN (V) | -688.68822 | .10600 | .11459 | .11648 | .05281  | -688.58222 | -688.57363 | -688.57174 | -688.63541 |

Table 4.1.1: [UH]<sup>+</sup> + CH<sub>3</sub>CH<sub>2</sub>CH<sub>2</sub>CN B3LYP/SDD/6-311+g(d,p) Quintet Spin Structure Coordinates

| Structure                                          | Coordinates |           |           |           |
|----------------------------------------------------|-------------|-----------|-----------|-----------|
| [UH] <sup>+</sup>                                  | U           | 0.000000  | 0.000000  | 0.021045  |
|                                                    | H           | 0.000000  | 0.000000  | -1.936098 |
| CH <sub>3</sub> CH <sub>2</sub> CH <sub>2</sub> CN | C           | -2.522854 | -0.398896 | 0.089360  |
|                                                    | C           | -1.432195 | 0.652798  | 0.300119  |
|                                                    | C           | -0.030160 | 0.099753  | -0.028426 |
|                                                    | C           | 1.031270  | 1.085065  | 0.165164  |
|                                                    | N           | 1.856379  | 1.875364  | 0.323011  |
|                                                    | H           | -2.363618 | -1.272371 | 0.728972  |
|                                                    | H           | -3.507281 | 0.011013  | 0.326889  |
|                                                    | H           | -2.548541 | -0.744398 | -0.948611 |
|                                                    | H           | -1.624726 | 1.527313  | -0.327858 |
|                                                    | H           | -1.441327 | 1.003630  | 1.335991  |
|                                                    | H           | 0.191242  | -0.769653 | 0.599702  |
|                                                    | H           | 0.007683  | -0.244642 | -1.067379 |
| II                                                 | U           | 0.701634  | -0.238544 | -1.504276 |
|                                                    | H           | -0.645339 | 0.937899  | -0.578939 |
|                                                    | N           | 2.586599  | 0.822055  | -0.854872 |
|                                                    | C           | 2.593596  | 0.271429  | 0.220764  |
|                                                    | C           | 3.207998  | 0.088633  | 1.554230  |
|                                                    | C           | 2.227235  | 0.282107  | 2.731387  |
|                                                    | H           | 3.629351  | -0.921806 | 1.577571  |
|                                                    | H           | 4.042682  | 0.798145  | 1.618761  |
|                                                    | C           | 1.666717  | 1.700732  | 2.840821  |
|                                                    | H           | 2.468254  | 2.437116  | 2.944722  |
|                                                    | H           | 1.068446  | 1.975076  | 1.966734  |
|                                                    | H           | 1.022208  | 1.788366  | 3.717424  |
|                                                    | H           | 2.778640  | 0.026511  | 3.639580  |
|                                                    | H           | 1.415797  | -0.448044 | 2.648089  |
| TSII→III                                           | U           | 0.311914  | 0.003491  | -1.052672 |
|                                                    | H           | 0.367137  | 1.987112  | -1.392400 |
|                                                    | N           | 2.529602  | -0.361046 | -0.862006 |
|                                                    | C           | 2.522411  | 0.013531  | 0.290256  |
|                                                    | C           | 3.316299  | 0.314209  | 1.506024  |
|                                                    | C           | 2.545152  | 0.278534  | 2.836583  |
|                                                    | H           | 4.149670  | -0.398907 | 1.509213  |
|                                                    | H           | 3.750449  | 1.308432  | 1.339756  |
|                                                    | C           | 1.510679  | 1.394084  | 2.988987  |
|                                                    | H           | 1.974030  | 2.381862  | 2.921024  |
|                                                    | H           | 0.735084  | 1.344123  | 2.214281  |
|                                                    | H           | 1.007354  | 1.327505  | 3.955233  |
|                                                    | H           | 3.286188  | 0.358861  | 3.635871  |
|                                                    | H           | 2.076814  | -0.703518 | 2.957502  |

|                                                                  |   |           |           |           |
|------------------------------------------------------------------|---|-----------|-----------|-----------|
| III                                                              | U | -0.162283 | 0.891662  | -1.661051 |
|                                                                  | H | 3.458136  | 2.452009  | -1.158567 |
|                                                                  | N | 1.676537  | 1.479088  | -0.923167 |
|                                                                  | C | 2.818625  | 1.857012  | -0.492611 |
|                                                                  | C | 3.416508  | 1.545378  | 0.841696  |
|                                                                  | C | 2.530156  | 0.850641  | 1.877259  |
|                                                                  | H | 4.310130  | 0.941845  | 0.614597  |
|                                                                  | H | 3.831899  | 2.484948  | 1.233151  |
|                                                                  | C | 1.494977  | 1.775441  | 2.527026  |
|                                                                  | H | 1.981404  | 2.601782  | 3.052402  |
|                                                                  | H | 0.812831  | 2.213214  | 1.791459  |
|                                                                  | H | 0.892603  | 1.232352  | 3.258540  |
|                                                                  | H | 3.179904  | 0.440115  | 2.654435  |
|                                                                  | H | 2.036781  | -0.010731 | 1.413705  |
| TSIII→IV                                                         | U | 0.155288  | 3.159255  | 0.212029  |
|                                                                  | H | 2.734073  | 0.647536  | -0.135981 |
|                                                                  | N | 1.236308  | 1.769479  | -1.252708 |
|                                                                  | C | 1.943003  | 1.334790  | -0.395612 |
|                                                                  | C | 1.738006  | 2.128455  | 1.753718  |
|                                                                  | C | 0.876423  | 1.369704  | 2.777715  |
|                                                                  | H | 2.780543  | 1.822726  | 1.823908  |
|                                                                  | H | 1.774507  | 3.227466  | 2.000662  |
|                                                                  | C | -0.589688 | 1.827748  | 2.868112  |
|                                                                  | H | -0.678729 | 2.896425  | 3.115185  |
|                                                                  | H | -1.172447 | 1.605646  | 1.954317  |
|                                                                  | H | -1.121100 | 1.293915  | 3.658218  |
|                                                                  | H | 1.332213  | 1.486626  | 3.766913  |
|                                                                  | H | 0.906412  | 0.299572  | 2.554831  |
| IV                                                               | U | 0.520724  | 2.703742  | -0.070773 |
|                                                                  | H | 3.595350  | 1.211872  | -1.092584 |
|                                                                  | N | 1.636596  | 0.688166  | -0.350765 |
|                                                                  | C | 2.575518  | 1.354473  | -0.733154 |
|                                                                  | C | 1.221647  | 3.226287  | 2.103506  |
|                                                                  | C | 0.164791  | 2.213529  | 2.595022  |
|                                                                  | H | 2.235073  | 2.927445  | 2.383435  |
|                                                                  | H | 1.027629  | 4.227427  | 2.503375  |
|                                                                  | C | -1.259902 | 2.783859  | 2.635962  |
|                                                                  | H | -1.316753 | 3.611315  | 3.345770  |
|                                                                  | H | -1.599328 | 3.207401  | 1.668508  |
|                                                                  | H | -1.996541 | 2.028801  | 2.914432  |
|                                                                  | H | 0.422689  | 1.783572  | 3.566159  |
|                                                                  | H | 0.169251  | 1.293823  | 1.947895  |
| HCN                                                              | C | 0.000000  | 0.000000  | -0.498334 |
|                                                                  | H | 0.000000  | 0.000000  | -1.564845 |
|                                                                  | N | -0.000000 | 0.000000  | 0.650693  |
| [UCH <sub>2</sub> CH <sub>2</sub> CH <sub>3</sub> ] <sup>+</sup> | U | 0.795087  | 2.122141  | -0.058600 |
|                                                                  | C | 1.141705  | 3.209688  | 1.938936  |
|                                                                  | C | 0.160880  | 2.269272  | 2.662182  |
|                                                                  | H | 2.179187  | 3.052313  | 2.268914  |
|                                                                  | H | 0.892406  | 4.265572  | 2.073982  |
|                                                                  | C | -1.288592 | 2.764162  | 2.659607  |
|                                                                  | H | -1.358783 | 3.716423  | 3.189216  |
|                                                                  | H | -1.674527 | 2.948509  | 1.644133  |
|                                                                  | H | -1.960475 | 2.049035  | 3.136947  |
|                                                                  | H | 0.495659  | 2.035058  | 3.675346  |
|                                                                  | H | 0.180534  | 1.241847  | 2.189733  |

Table 4.2: [UH]<sup>+</sup> + CH<sub>3</sub>CH<sub>2</sub>CH<sub>2</sub>CN PBE1PBE/SDD/6-311+g(d,p) Quintet Spin Energies (Hartree)

| Structure | E0 | E_ZPE | E_tot | H_corr | G_corr | E0+E_ZPE | E0+E_tot | E0+H_corr | E0+G_corr |
|-----------|----|-------|-------|--------|--------|----------|----------|-----------|-----------|
|-----------|----|-------|-------|--------|--------|----------|----------|-----------|-----------|

|                                                                            |            |        |        |        |         |            |            |            |            |
|----------------------------------------------------------------------------|------------|--------|--------|--------|---------|------------|------------|------------|------------|
| [UH] <sup>+</sup>                                                          | -477.12109 | .00377 | .00614 | .00708 | -.01913 | -477.11732 | -477.11495 | -477.11401 | -477.14021 |
| CH <sub>3</sub> CH <sub>2</sub> CH <sub>2</sub> CN                         | -211.17680 | .10305 | .10900 | .10995 | .07408  | -211.07375 | -211.06780 | -211.06685 | -211.10272 |
| [UH] <sup>+</sup> + CH <sub>3</sub> CH <sub>2</sub> CH <sub>2</sub> CN (I) | -688.29789 | .10682 | .11514 | .11703 | .05495  | -688.19106 | -688.18275 | -688.18086 | -688.24294 |
| II                                                                         | -688.36420 | .10766 | .11636 | .11731 | .06946  | -688.25654 | -688.24784 | -688.24690 | -688.29475 |
| TSII→III                                                                   | -688.35408 | .10823 | .11597 | .11692 | .07131  | -688.24585 | -688.23810 | -688.23716 | -688.28276 |
| III                                                                        | -688.40520 | .11449 | .12239 | .12334 | .07734  | -688.29071 | -688.28281 | -688.28186 | -688.32785 |
| TSIII→IV                                                                   | -688.34881 | .10973 | .11716 | .11810 | .07443  | -688.23908 | -688.23165 | -688.23071 | -688.27439 |
| IV                                                                         | -688.37001 | .10824 | .11695 | .11790 | .07138  | -688.26177 | -688.25306 | -688.25212 | -688.29864 |
| HCN                                                                        | -93.33544  | .01649 | .01903 | .01997 | -.00287 | -93.31895  | -93.31641  | -93.31547  | -93.33831  |
| [UCH <sub>2</sub> CH <sub>2</sub> CH <sub>3</sub> ] <sup>+</sup>           | -594.98208 | .09017 | .09597 | .09691 | .05730  | -594.89192 | -594.88612 | -594.88517 | -594.92478 |
| [UCH <sub>2</sub> CH <sub>2</sub> CH <sub>3</sub> ] <sup>+</sup> + HCN (V) | -688.31752 | .10666 | .11499 | .11688 | .05443  | -688.21086 | -688.20253 | -688.20064 | -688.26309 |

Table 4.2.1: [UH]<sup>+</sup> + CH<sub>3</sub>CH<sub>2</sub>CH<sub>2</sub>CN PBE1PBE/SDD/6-311+g(d,p) Quintet Spin Structure Coordinates

| Structure                                          | Coordinates |           |           |           |
|----------------------------------------------------|-------------|-----------|-----------|-----------|
| [UH] <sup>+</sup>                                  | U           | -0.282792 | 0.024095  | 0.017719  |
|                                                    | H           | -0.733284 | 1.219330  | 1.490648  |
| CH <sub>3</sub> CH <sub>2</sub> CH <sub>2</sub> CN | C           | -2.513350 | -0.394731 | 0.089606  |
|                                                    | C           | -1.430125 | 0.651711  | 0.299570  |
|                                                    | C           | -0.038341 | 0.099404  | -0.027597 |
|                                                    | C           | 1.018885  | 1.080285  | 0.165007  |
|                                                    | N           | 1.843719  | 1.869872  | 0.322588  |
|                                                    | H           | -2.352853 | -1.268753 | 0.728890  |
|                                                    | H           | -3.499479 | 0.012196  | 0.326398  |
|                                                    | H           | -2.537774 | -0.740716 | -0.948687 |
|                                                    | H           | -1.621486 | 1.527527  | -0.328203 |
|                                                    | H           | -1.438102 | 1.003772  | 1.335793  |
|                                                    | H           | 0.184209  | -0.770412 | 0.600718  |
|                                                    | H           | 0.000569  | -0.245177 | -1.067148 |
| II                                                 | U           | 0.523058  | -0.232881 | -1.225020 |
|                                                    | H           | -0.420936 | 1.379779  | -0.505095 |
|                                                    | N           | 2.620766  | 0.481502  | -0.936565 |
|                                                    | C           | 2.561734  | 0.169919  | 0.233232  |
|                                                    | C           | 3.223640  | 0.123245  | 1.549066  |
|                                                    | C           | 2.281593  | 0.287859  | 2.742779  |
|                                                    | H           | 3.741247  | -0.843695 | 1.590908  |
|                                                    | H           | 3.997317  | 0.902395  | 1.539958  |
|                                                    | C           | 1.588468  | 1.641147  | 2.777455  |
|                                                    | H           | 2.315648  | 2.457527  | 2.816583  |
|                                                    | H           | 0.956783  | 1.802401  | 1.896163  |
|                                                    | H           | 0.948933  | 1.726982  | 3.658332  |
|                                                    | H           | 2.879573  | 0.148455  | 3.647610  |
|                                                    | H           | 1.545994  | -0.524961 | 2.736589  |
| TSII→III                                           | U           | 1.169106  | -0.113360 | -1.806146 |
|                                                    | H           | 1.111702  | -0.854742 | 0.063419  |
|                                                    | N           | 2.048997  | 1.339388  | -0.512471 |
|                                                    | C           | 2.383711  | 0.370949  | 0.192692  |
|                                                    | C           | 3.044364  | 0.068101  | 1.477041  |
|                                                    | C           | 2.136522  | 0.377938  | 2.681780  |
|                                                    | H           | 3.346809  | -0.981262 | 1.493416  |
|                                                    | H           | 3.949001  | 0.687448  | 1.517804  |
|                                                    | C           | 1.816982  | 1.853369  | 2.855591  |
|                                                    | H           | 2.728268  | 2.443322  | 2.990050  |
|                                                    | H           | 1.280088  | 2.264590  | 1.995829  |
|                                                    | H           | 1.191768  | 2.005246  | 3.738394  |

|                                                                  |   |           |           |           |
|------------------------------------------------------------------|---|-----------|-----------|-----------|
|                                                                  | H | 2.658109  | -0.000642 | 3.566147  |
|                                                                  | H | 1.217358  | -0.212072 | 2.594108  |
| III                                                              | U | -0.184431 | 0.929913  | -1.536918 |
|                                                                  | H | 3.464353  | 2.439087  | -1.156945 |
|                                                                  | N | 1.673238  | 1.494574  | -0.889190 |
|                                                                  | C | 2.825400  | 1.856134  | -0.478931 |
|                                                                  | C | 3.422102  | 1.536792  | 0.844076  |
|                                                                  | C | 2.529527  | 0.848076  | 1.864368  |
|                                                                  | H | 4.313222  | 0.930532  | 0.612593  |
|                                                                  | H | 3.844483  | 2.472594  | 1.239444  |
|                                                                  | C | 1.496344  | 1.773567  | 2.494799  |
|                                                                  | H | 1.979675  | 2.598155  | 3.026838  |
|                                                                  | H | 0.829009  | 2.217648  | 1.748045  |
|                                                                  | H | 0.878046  | 1.236676  | 3.218127  |
|                                                                  | H | 3.167876  | 0.433448  | 2.649595  |
|                                                                  | H | 2.039364  | -0.012440 | 1.392974  |
| TSIII→IV                                                         | U | 0.266661  | 3.165134  | 0.319034  |
|                                                                  | H | 2.762179  | 0.955197  | -0.242090 |
|                                                                  | N | 0.748884  | 1.469283  | -0.836667 |
|                                                                  | C | 1.853626  | 1.550187  | -0.239524 |
|                                                                  | C | 1.837915  | 2.110878  | 1.802890  |
|                                                                  | C | 0.906477  | 1.375117  | 2.764364  |
|                                                                  | H | 2.848565  | 1.709198  | 1.854859  |
|                                                                  | H | 1.949882  | 3.196267  | 2.080928  |
|                                                                  | C | -0.560958 | 1.813707  | 2.708380  |
|                                                                  | H | -0.697203 | 2.889402  | 2.919492  |
|                                                                  | H | -1.069155 | 1.527651  | 1.763996  |
|                                                                  | H | -1.156612 | 1.302546  | 3.467781  |
|                                                                  | H | 1.267753  | 1.500339  | 3.792062  |
|                                                                  | H | 0.956799  | 0.304437  | 2.545804  |
| IV                                                               | U | 0.492604  | 2.746296  | -0.023203 |
|                                                                  | H | 3.525910  | 1.245537  | -0.996140 |
|                                                                  | N | 1.536719  | 0.724542  | -0.333427 |
|                                                                  | C | 2.496708  | 1.389577  | -0.662884 |
|                                                                  | C | 1.246548  | 3.218382  | 2.120083  |
|                                                                  | C | 0.189681  | 2.199332  | 2.559755  |
|                                                                  | H | 2.258861  | 2.903262  | 2.387342  |
|                                                                  | H | 1.052328  | 4.205575  | 2.555196  |
|                                                                  | C | -1.224937 | 2.772525  | 2.597357  |
|                                                                  | H | -1.287252 | 3.570936  | 3.340268  |
|                                                                  | H | -1.547975 | 3.249643  | 1.646861  |
|                                                                  | H | -1.975376 | 2.014150  | 2.827527  |
|                                                                  | H | 0.428315  | 1.724998  | 3.515980  |
|                                                                  | H | 0.204608  | 1.296958  | 1.882073  |
| HCN                                                              | C | 0.000000  | 0.000000  | -0.497856 |
|                                                                  | H | 0.000000  | 0.000000  | -1.566083 |
|                                                                  | N | -0.000000 | -0.000000 | 0.650460  |
| [UCH <sub>2</sub> CH <sub>2</sub> CH <sub>3</sub> ] <sup>+</sup> | U | 0.492291  | 2.165845  | 0.049288  |
|                                                                  | C | 1.173266  | 3.193174  | 1.974840  |
|                                                                  | C | 0.184746  | 2.278529  | 2.697675  |
|                                                                  | H | 2.215640  | 2.971262  | 2.240000  |
|                                                                  | H | 0.973244  | 4.252801  | 2.160999  |
|                                                                  | C | -1.256308 | 2.763954  | 2.590415  |
|                                                                  | H | -1.356571 | 3.747544  | 3.054353  |
|                                                                  | H | -1.605342 | 2.914903  | 1.544797  |
|                                                                  | H | -1.963662 | 2.072944  | 3.052520  |
|                                                                  | H | 0.457480  | 2.084385  | 3.738189  |
|                                                                  | H | 0.248295  | 1.228678  | 2.277321  |

Table 4.3: [UH]<sup>+</sup> + CH<sub>3</sub>CH<sub>2</sub>CH<sub>2</sub>CN B3LYP/SDD/6-311+g(d,p) Singlet Spin Energies (Hartree)

| Structure                                                                  | E0         | E_ZPE  | E_tot  | H_corr | G_corr  | E0+E_ZPE   | E0+E_tot   | E0+H_corr  | E0+G_corr  |
|----------------------------------------------------------------------------|------------|--------|--------|--------|---------|------------|------------|------------|------------|
| [UH] <sup>+</sup>                                                          | -477.13768 | .00368 | .00605 | .00699 | -.01769 | -477.13400 | -477.13164 | -477.13069 | -477.15538 |
| CH <sub>3</sub> CH <sub>2</sub> CH <sub>2</sub> CN                         | -211.44532 | .10244 | .10841 | .10935 | .07343  | -211.34289 | -211.33691 | -211.33597 | -211.37189 |
| [UH] <sup>+</sup> + CH <sub>3</sub> CH <sub>2</sub> CN (I)                 | -688.58300 | .10612 | .11445 | .11634 | .05574  | -688.47689 | -688.46855 | -688.46666 | -688.52726 |
| II                                                                         | -688.68196 | .10701 | .11548 | .11642 | .07082  | -688.57496 | -688.56649 | -688.56554 | -688.61115 |
| TSII→III                                                                   | -688.65972 | .10759 | .11515 | .11610 | .07231  | -688.55213 | -688.54457 | -688.54362 | -688.58741 |
| III                                                                        | -688.68554 | .11307 | .12037 | .12132 | .07948  | -688.57247 | -688.56517 | -688.56422 | -688.60606 |
| TSIII→IV                                                                   | -688.66041 | .10979 | .11688 | .11783 | .07655  | -688.55062 | -688.54353 | -688.54259 | -688.58386 |
| IV                                                                         | -688.69530 | .10802 | .11657 | .11752 | .07263  | -688.58728 | -688.57873 | -688.57779 | -688.62267 |
| HCN                                                                        | -93.45449  | .01636 | .01890 | .01985 | -.00300 | -93.43813  | -93.43559  | -93.43465  | -93.45749  |
| [UCH <sub>2</sub> CH <sub>2</sub> CH <sub>3</sub> ] <sup>+</sup>           | -595.14973 | .08955 | .09539 | .09633 | .05801  | -595.06018 | -595.05434 | -595.05339 | -595.09172 |
| [UCH <sub>2</sub> CH <sub>2</sub> CH <sub>3</sub> ] <sup>+</sup> + HCN (V) | -688.60422 | .10591 | .11429 | .11618 | .05501  | -688.49831 | -688.48993 | -688.48804 | -688.54921 |

Table 4.3.1: [UH]<sup>+</sup> + CH<sub>3</sub>CH<sub>2</sub>CH<sub>2</sub>CN B3LYP/SDD/6-311+g(d,p) Singlet Spin Structure Coordinates

| Structure                                          | Coordinates                     |
|----------------------------------------------------|---------------------------------|
| [UH] <sup>+</sup>                                  | U -0.274048 0.000897 -0.010869  |
|                                                    | H -0.723542 1.193481 1.458793   |
| CH <sub>3</sub> CH <sub>2</sub> CH <sub>2</sub> CN | C -2.522854 -0.398896 0.089360  |
|                                                    | C -1.432195 0.652798 0.300119   |
|                                                    | C -0.030160 0.099753 -0.028426  |
|                                                    | C 1.031270 1.085065 0.165164    |
|                                                    | N 1.856379 1.875364 0.323011    |
|                                                    | H -2.363618 -1.272371 0.728972  |
|                                                    | H -3.507281 0.011013 0.326889   |
|                                                    | H -2.548541 -0.744398 -0.948611 |
|                                                    | H -1.624726 1.527313 -0.327858  |
|                                                    | H -1.441327 1.003630 1.335991   |
|                                                    | H 0.191242 -0.769653 0.599702   |
|                                                    | H 0.007683 -0.244642 -1.067379  |
| II                                                 | U 0.689192 -0.137116 -1.288731  |
|                                                    | H -0.041196 1.669922 -1.028204  |
|                                                    | N 2.623888 0.238145 -0.978948   |
|                                                    | C 2.309336 0.084436 0.260381    |
|                                                    | C 3.126504 0.191122 1.494428    |
|                                                    | C 2.327353 0.271117 2.803056    |
|                                                    | H 3.774434 -0.698301 1.490642   |
|                                                    | H 3.803327 1.047549 1.381155    |
|                                                    | C 1.519683 1.563424 2.941311    |
|                                                    | H 2.170392 2.442019 2.918247    |
|                                                    | H 0.787851 1.676697 2.133068    |
|                                                    | H 0.970841 1.582651 3.884805    |
| TSII→III                                           | H 3.033702 0.189236 3.633217    |
|                                                    | H 1.668511 -0.601225 2.877570   |
|                                                    | U 0.865048 -0.034092 -1.440366  |
|                                                    | H 1.171747 1.250929 0.041753    |
|                                                    | N 2.751013 0.058591 -1.118106   |
|                                                    | C 2.269297 0.149139 0.158755    |
|                                                    | C 3.079964 0.297591 1.397667    |
|                                                    | C 2.303008 0.325091 2.724276    |
|                                                    | H 3.771602 -0.554392 1.383050   |
|                                                    | H 3.713695 1.187987 1.292881    |

|                                                                  |   |           |           |           |
|------------------------------------------------------------------|---|-----------|-----------|-----------|
|                                                                  | C | 1.516736  | 1.614105  | 2.979848  |
|                                                                  | H | 2.173947  | 2.488218  | 2.959620  |
|                                                                  | H | 0.726592  | 1.775658  | 2.240614  |
|                                                                  | H | 1.039816  | 1.583959  | 3.961813  |
|                                                                  | H | 3.031394  | 0.187921  | 3.528203  |
|                                                                  | H | 1.636685  | -0.543394 | 2.770650  |
| III                                                              | U | 0.413995  | 2.321219  | -0.487688 |
|                                                                  | H | 3.363068  | 2.368554  | -1.220987 |
|                                                                  | N | 1.683251  | 1.074958  | -0.970239 |
|                                                                  | C | 2.724694  | 1.910250  | -0.461687 |
|                                                                  | C | 3.472567  | 1.526517  | 0.804121  |
|                                                                  | C | 2.632904  | 0.859293  | 1.908102  |
|                                                                  | H | 4.297990  | 0.851756  | 0.544610  |
|                                                                  | H | 3.945301  | 2.436467  | 1.192284  |
|                                                                  | C | 1.299647  | 1.561379  | 2.232879  |
|                                                                  | H | 1.348394  | 2.655109  | 2.084123  |
|                                                                  | H | 0.448304  | 1.117355  | 1.670923  |
|                                                                  | H | 0.991346  | 1.424068  | 3.271601  |
|                                                                  | H | 3.233691  | 0.826704  | 2.819463  |
|                                                                  | H | 2.423056  | -0.178872 | 1.641370  |
| TSIII→IV                                                         | U | 0.129704  | 2.129152  | -0.151820 |
|                                                                  | H | 3.312959  | 1.975283  | -0.077028 |
|                                                                  | N | 1.509425  | 0.896846  | -0.645485 |
|                                                                  | C | 2.230326  | 1.930298  | -0.072337 |
|                                                                  | C | 1.718681  | 2.068017  | 1.811070  |
|                                                                  | C | 0.579440  | 1.229122  | 2.376760  |
|                                                                  | H | 2.688463  | 1.640349  | 2.048635  |
|                                                                  | H | 1.703611  | 3.108155  | 2.147423  |
|                                                                  | C | -0.544951 | 2.048092  | 3.025589  |
|                                                                  | H | -0.952843 | 2.836877  | 2.365723  |
|                                                                  | H | -1.383031 | 1.419534  | 3.330908  |
|                                                                  | H | -0.170538 | 2.578469  | 3.903092  |
|                                                                  | H | 0.940537  | 0.462161  | 3.065328  |
|                                                                  | H | 0.153033  | 0.546985  | 1.573449  |
| IV                                                               | U | 0.557642  | 2.333777  | -0.067173 |
|                                                                  | H | 3.556452  | 1.341903  | -1.056629 |
|                                                                  | N | 1.731814  | 0.693011  | -0.201740 |
|                                                                  | C | 2.545395  | 1.552778  | -0.705240 |
|                                                                  | C | 1.200287  | 3.161774  | 1.983706  |
|                                                                  | C | 0.159806  | 2.225782  | 2.625717  |
|                                                                  | H | 2.223020  | 2.929194  | 2.285874  |
|                                                                  | H | 0.989691  | 4.216965  | 2.190582  |
|                                                                  | C | -1.264403 | 2.794874  | 2.657317  |
|                                                                  | H | -1.296358 | 3.701216  | 3.264997  |
|                                                                  | H | -1.647221 | 3.089658  | 1.661362  |
|                                                                  | H | -1.980285 | 2.077110  | 3.060551  |
|                                                                  | H | 0.468722  | 1.909571  | 3.625145  |
|                                                                  | H | 0.152179  | 1.234098  | 2.092319  |
| HCN                                                              | C | 0.000000  | 0.000000  | -0.498334 |
|                                                                  | H | 0.000000  | 0.000000  | -1.564845 |
|                                                                  | N | -0.000000 | 0.000000  | 0.650693  |
| [UCH <sub>2</sub> CH <sub>2</sub> CH <sub>3</sub> ] <sup>+</sup> | U | -0.152646 | 3.691684  | 0.411097  |
|                                                                  | C | 1.336762  | 3.026067  | 1.974070  |
|                                                                  | C | 0.214523  | 2.422637  | 2.871291  |
|                                                                  | H | 2.053425  | 2.269356  | 1.638086  |
|                                                                  | H | 1.875462  | 3.839274  | 2.471907  |
|                                                                  | C | -1.276758 | 2.535371  | 2.359825  |
|                                                                  | H | -1.668511 | 3.582683  | 2.276645  |
|                                                                  | H | -1.496280 | 1.968587  | 1.417925  |
|                                                                  | H | -1.937157 | 2.073929  | 3.095138  |
|                                                                  | H | 0.222943  | 2.907127  | 3.847315  |

|  |   |          |          |          |
|--|---|----------|----------|----------|
|  | H | 0.391316 | 1.357303 | 3.017097 |
|--|---|----------|----------|----------|

Table 4.4: [UH]<sup>+</sup> + CH<sub>3</sub>CH<sub>2</sub>CH<sub>2</sub>CN PBE1PBE/SDD/6-311+g(d,p) Singlet Spin Energies (Hartree)

| Structure                                                                  | EO         | E_ZPE  | E_tot  | H_corr | G_corr  | EO+E_ZPE   | EO+E_tot   | EO+H_corr  | EO+G_corr  |
|----------------------------------------------------------------------------|------------|--------|--------|--------|---------|------------|------------|------------|------------|
| [UH] <sup>+</sup>                                                          | -477.01929 | .00372 | .00608 | .00703 | -.01765 | -477.01557 | -477.01321 | -477.01226 | -477.03694 |
| CH <sub>3</sub> CH <sub>2</sub> CH <sub>2</sub> CN                         | -211.17680 | .10305 | .10900 | .10995 | .07408  | -211.07375 | -211.06780 | -211.06685 | -211.10272 |
| [UH] <sup>+</sup> + CH <sub>3</sub> CH <sub>2</sub> CN (I)                 | -688.19608 | .10677 | .11508 | .11697 | .05643  | -688.08932 | -688.08100 | -688.07911 | -688.13966 |
| II                                                                         | -688.31743 | .10766 | .11611 | .11706 | .07156  | -688.20976 | -688.20132 | -688.20037 | -688.24587 |
| TSII→III                                                                   | -688.30247 | .10842 | .11593 | .11688 | .07303  | -688.19405 | -688.18654 | -688.18560 | -688.22944 |
| III                                                                        | -688.32778 | .11385 | .12095 | .12189 | .08062  | -688.21393 | -688.20683 | -688.20589 | -688.24716 |
| TSIII→IV                                                                   | -688.30094 | .11006 | .11730 | .11824 | .07655  | -688.19088 | -688.18365 | -688.18270 | -688.22439 |
| IV                                                                         | -688.33464 | .10890 | .11725 | .11819 | .07403  | -688.22575 | -688.21740 | -688.21645 | -688.26061 |
| HCN                                                                        | -93.33544  | .01649 | .01903 | .01997 | -.00287 | -93.31895  | -93.31641  | -93.31547  | -93.33831  |
| [UCH <sub>2</sub> CH <sub>2</sub> CH <sub>3</sub> ] <sup>+</sup>           | -594.89042 | .08956 | .09523 | .09618 | .05841  | -594.80085 | -594.79518 | -594.79424 | -594.83201 |
| [UCH <sub>2</sub> CH <sub>2</sub> CH <sub>3</sub> ] <sup>+</sup> + HCN (V) | -688.22585 | .10606 | .11426 | .11615 | .05554  | -688.11980 | -688.11160 | -688.10971 | -688.17031 |

Table 4.4.1: [UH]<sup>+</sup> + CH<sub>3</sub>CH<sub>2</sub>CH<sub>2</sub>CN PBE1PBE/SDD/6-311+g(d,p) Singlet Spin Structure Coordinates

| Structure                                          | Coordinates                     |
|----------------------------------------------------|---------------------------------|
| [UH] <sup>+</sup>                                  | U -0.274832 0.002976 -0.008307  |
|                                                    | H -0.722758 1.191402 1.456231   |
| CH <sub>3</sub> CH <sub>2</sub> CH <sub>2</sub> CN | C -2.513350 -0.394731 0.089606  |
|                                                    | C -1.430125 0.651711 0.299570   |
|                                                    | C -0.038341 0.099404 -0.027597  |
|                                                    | C 1.018885 1.080285 0.165007    |
|                                                    | N 1.843719 1.869872 0.322588    |
|                                                    | H -2.352853 -1.268753 0.728890  |
|                                                    | H -3.499479 0.012196 0.326398   |
|                                                    | H -2.537774 -0.740716 -0.948687 |
|                                                    | H -1.621486 1.527527 -0.328203  |
|                                                    | H -1.438102 1.003772 1.335793   |
|                                                    | H 0.184209 -0.770412 0.600718   |
|                                                    | H 0.000569 -0.245177 -1.067148  |
| II                                                 | U 0.679491 -0.116559 -1.211868  |
|                                                    | H 0.045338 1.708041 -0.914956   |
|                                                    | N 2.610168 0.183768 -0.973609   |
|                                                    | C 2.289453 0.078919 0.276107    |
|                                                    | C 3.121942 0.197395 1.488699    |
|                                                    | C 2.337821 0.278842 2.795074    |
|                                                    | H 3.786291 -0.680154 1.478192   |
|                                                    | H 3.785006 1.063380 1.358136    |
|                                                    | C 1.502970 1.545613 2.906453    |
|                                                    | H 2.132006 2.439994 2.868333    |
|                                                    | H 0.773789 1.626940 2.090439    |
|                                                    | H 0.946828 1.571681 3.845936    |
|                                                    | H 3.050355 0.231299 3.623525    |
|                                                    | H 1.702359 -0.609486 2.891533   |
| TSII→III                                           | U 0.876219 0.027761 -1.393851   |
|                                                    | H 1.189801 1.319933 0.041056    |
|                                                    | N 2.746932 0.044570 -1.096610   |
|                                                    | C 2.261183 0.151884 0.178849    |

|                                                                  |   |           |           |           |
|------------------------------------------------------------------|---|-----------|-----------|-----------|
|                                                                  | C | 3.076301  | 0.279598  | 1.407511  |
|                                                                  | C | 2.304798  | 0.321774  | 2.725533  |
|                                                                  | H | 3.753315  | -0.584808 | 1.387403  |
|                                                                  | H | 3.727339  | 1.157820  | 1.298241  |
|                                                                  | C | 1.513870  | 1.602274  | 2.953370  |
|                                                                  | H | 2.163549  | 2.481859  | 2.910090  |
|                                                                  | H | 0.719713  | 1.740708  | 2.212692  |
|                                                                  | H | 1.039042  | 1.592934  | 3.937152  |
|                                                                  | H | 3.033638  | 0.202452  | 3.532874  |
|                                                                  | H | 1.644844  | -0.551449 | 2.786346  |
| III                                                              | U | 0.457514  | 2.305626  | -0.448615 |
|                                                                  | H | 3.326434  | 2.385668  | -1.194917 |
|                                                                  | N | 1.677585  | 1.040716  | -0.929721 |
|                                                                  | C | 2.696089  | 1.939443  | -0.417655 |
|                                                                  | C | 3.473536  | 1.528709  | 0.813413  |
|                                                                  | C | 2.634024  | 0.854764  | 1.899515  |
|                                                                  | H | 4.292081  | 0.854534  | 0.532646  |
|                                                                  | H | 3.951460  | 2.431726  | 1.213748  |
|                                                                  | C | 1.308667  | 1.563018  | 2.201494  |
|                                                                  | H | 1.360251  | 2.652089  | 2.003815  |
|                                                                  | H | 0.452572  | 1.086211  | 1.671781  |
|                                                                  | H | 1.005478  | 1.484214  | 3.248619  |
|                                                                  | H | 3.222481  | 0.806974  | 2.818907  |
|                                                                  | H | 2.420039  | -0.178936 | 1.615846  |
| TSIII→IV                                                         | U | 0.214535  | 2.858441  | 0.200720  |
|                                                                  | H | 2.905358  | 1.254326  | -0.312434 |
|                                                                  | N | 0.751513  | 1.173049  | -0.509083 |
|                                                                  | C | 1.951229  | 1.750717  | -0.165702 |
|                                                                  | C | 1.854394  | 2.127993  | 1.776875  |
|                                                                  | C | 0.861235  | 1.344876  | 2.647074  |
|                                                                  | H | 2.838769  | 1.666656  | 1.850946  |
|                                                                  | H | 1.996978  | 3.171544  | 2.125311  |
|                                                                  | C | -0.579673 | 1.884021  | 2.732020  |
|                                                                  | H | -0.632717 | 2.963208  | 2.950587  |
|                                                                  | H | -1.225783 | 1.632122  | 1.866146  |
|                                                                  | H | -1.112717 | 1.398582  | 3.552805  |
|                                                                  | H | 1.257657  | 1.341183  | 3.667968  |
|                                                                  | H | 0.834036  | 0.302624  | 2.318074  |
| IV                                                               | U | 0.519100  | 2.361156  | -0.031125 |
|                                                                  | H | 3.470548  | 1.299990  | -0.936344 |
|                                                                  | N | 1.609123  | 0.693340  | -0.135174 |
|                                                                  | C | 2.457439  | 1.543835  | -0.611619 |
|                                                                  | C | 1.216088  | 3.203301  | 1.969810  |
|                                                                  | C | 0.205111  | 2.239437  | 2.591724  |
|                                                                  | H | 2.245968  | 2.986481  | 2.260181  |
|                                                                  | H | 0.979881  | 4.250528  | 2.192036  |
|                                                                  | C | -1.226498 | 2.765727  | 2.617274  |
|                                                                  | H | -1.285993 | 3.665771  | 3.233376  |
|                                                                  | H | -1.615506 | 3.068402  | 1.623593  |
|                                                                  | H | -1.929481 | 2.026072  | 3.004720  |
|                                                                  | H | 0.513633  | 1.910063  | 3.587930  |
|                                                                  | H | 0.237330  | 1.247606  | 2.050404  |
| HCN                                                              | C | 0.000000  | 0.000000  | -0.497856 |
|                                                                  | H | 0.000000  | 0.000000  | -1.566083 |
|                                                                  | N | -0.000000 | -0.000000 | 0.650460  |
| [UCH <sub>2</sub> CH <sub>2</sub> CH <sub>3</sub> ] <sup>+</sup> | U | -0.213106 | 3.702483  | 0.535776  |
|                                                                  | C | 1.343447  | 3.067303  | 2.002448  |
|                                                                  | C | 0.226989  | 2.417179  | 2.850027  |
|                                                                  | H | 2.073286  | 2.336229  | 1.637967  |
|                                                                  | H | 1.855580  | 3.877168  | 2.533408  |
|                                                                  | C | -1.263973 | 2.517085  | 2.327015  |
|                                                                  | H | -1.691420 | 3.567670  | 2.290116  |

|  |   |           |          |          |
|--|---|-----------|----------|----------|
|  | H | -1.472155 | 1.965060 | 1.357529 |
|  | H | -1.909777 | 2.009950 | 3.046187 |
|  | H | 0.202001  | 2.866029 | 3.843510 |
|  | H | 0.412208  | 1.347862 | 2.956416 |

Table 4.5:  $[\text{UH}]^+ + \text{CH}_3\text{CH}_2\text{CH}_2\text{CN}$  B3LYP/SDD/6-311+g(d,p) Triplet Spin Energies (Hartree)

| Structure                                                        | E0         | E_ZPE  | E_tot  | H_corr | G_corr  | E0+E_ZPE   | E0+E_tot   | E0+H_corr  | E0+G_corr  |
|------------------------------------------------------------------|------------|--------|--------|--------|---------|------------|------------|------------|------------|
| $[\text{UH}]^+$                                                  | -477.14828 | .00361 | .00597 | .00691 | -.01880 | -477.14467 | -477.14231 | -477.14136 | -477.16708 |
| $\text{CH}_3\text{CH}_2\text{CH}_2\text{CN}$                     | -211.44532 | .10244 | .10841 | .10935 | .07343  | -211.34289 | -211.33691 | -211.33597 | -211.37189 |
| $[\text{UH}]^+ + \text{CH}_3\text{CH}_2\text{CH}_2\text{CN}$ (I) | -688.59360 | .10604 | .11438 | .11626 | .05464  | -688.48756 | -688.47922 | -688.47733 | -688.53896 |
| II                                                               | -688.72812 | .10663 | .11538 | .11633 | .06910  | -688.62149 | -688.61274 | -688.61180 | -688.65903 |
| TSII→III                                                         | -688.70572 | .10716 | .11493 | .11587 | .07081  | -688.59856 | -688.59079 | -688.58985 | -688.63491 |
| III                                                              | -688.75999 | .11373 | .12173 | .12267 | .07680  | -688.64626 | -688.63827 | -688.63732 | -688.68319 |
| TSIII→IV                                                         | -688.70207 | .10913 | .11656 | .11750 | .07446  | -688.59294 | -688.58551 | -688.58456 | -688.62761 |
| IV                                                               | -688.73621 | .10748 | .11629 | .11723 | .07074  | -688.62873 | -688.61992 | -688.61898 | -688.66547 |
| HCN                                                              | -93.45449  | .01636 | .01890 | .01985 | -.00300 | -93.43813  | -93.43559  | -93.43465  | -93.45749  |
| $[\text{UCH}_2\text{CH}_2\text{CH}_3]^+$                         | -595.22444 | .08961 | .09566 | .09661 | .05626  | -595.13483 | -595.12878 | -595.12783 | -595.16818 |
| $[\text{UCH}_2\text{CH}_2\text{CH}_3]^+ + \text{HCN}$ (V)        | -688.67893 | .10598 | .11457 | .11646 | .05326  | -688.57296 | -688.56437 | -688.56248 | -688.62567 |

Table 4.5.1:  $[\text{UH}]^+ + \text{CH}_3\text{CH}_2\text{CH}_2\text{CN}$  B3LYP/SDD/6-311+g(d,p) Triplet Spin Structure Coordinates

| Structure                                    | Coordinates |           |           |           |
|----------------------------------------------|-------------|-----------|-----------|-----------|
| $[\text{UH}]^+$                              | U           | -0.275143 | 0.003800  | -0.007291 |
|                                              | H           | -0.722447 | 1.190578  | 1.455215  |
| $\text{CH}_3\text{CH}_2\text{CH}_2\text{CN}$ | C           | -2.522854 | -0.398896 | 0.089360  |
|                                              | C           | -1.432195 | 0.652798  | 0.300119  |
|                                              | C           | -0.030160 | 0.099753  | -0.028426 |
|                                              | C           | 1.031270  | 1.085065  | 0.165164  |
|                                              | N           | 1.856379  | 1.875364  | 0.323011  |
|                                              | H           | -2.363618 | -1.272371 | 0.728972  |
|                                              | H           | -3.507281 | 0.011013  | 0.326889  |
|                                              | H           | -2.548541 | -0.744398 | -0.948611 |
|                                              | H           | -1.624726 | 1.527313  | -0.327858 |
|                                              | H           | -1.441327 | 1.003630  | 1.335991  |
|                                              | H           | 0.191242  | -0.769653 | 0.599702  |
|                                              | H           | 0.007683  | -0.244642 | -1.067379 |
| II                                           | U           | 0.658068  | -0.159646 | -1.369540 |
|                                              | H           | -0.319802 | 1.499306  | -0.860609 |
|                                              | N           | 2.650619  | 0.430674  | -0.949709 |
|                                              | C           | 2.435302  | 0.131135  | 0.239356  |
|                                              | C           | 3.175996  | 0.154072  | 1.528557  |
|                                              | C           | 2.297286  | 0.265649  | 2.784396  |
|                                              | H           | 3.746542  | -0.785183 | 1.545759  |
|                                              | H           | 3.912211  | 0.965436  | 1.478037  |
|                                              | C           | 1.562044  | 1.603098  | 2.893992  |
|                                              | H           | 2.264924  | 2.440440  | 2.918264  |
|                                              | H           | 0.882185  | 1.767399  | 2.050756  |
|                                              | H           | 0.966707  | 1.644970  | 3.808062  |
|                                              | H           | 2.946555  | 0.128973  | 3.652900  |
|                                              | H           | 1.585181  | -0.566650 | 2.801774  |

|                                                                  |   |           |           |           |
|------------------------------------------------------------------|---|-----------|-----------|-----------|
| TSII→III                                                         | U | 0.797343  | -0.144970 | -1.512347 |
|                                                                  | H | 0.999379  | 0.980617  | 0.159295  |
|                                                                  | N | 2.773274  | 0.159664  | -1.112105 |
|                                                                  | C | 2.379905  | 0.153853  | 0.120549  |
|                                                                  | C | 3.104706  | 0.312732  | 1.410431  |
|                                                                  | C | 2.252214  | 0.326464  | 2.690067  |
|                                                                  | H | 3.807175  | -0.530753 | 1.428937  |
|                                                                  | H | 3.729925  | 1.212786  | 1.342514  |
|                                                                  | C | 1.577235  | 1.669645  | 2.984891  |
|                                                                  | H | 2.320293  | 2.464279  | 3.096309  |
|                                                                  | H | 0.884865  | 1.970937  | 2.193859  |
|                                                                  | H | 1.008505  | 1.617863  | 3.915827  |
|                                                                  | H | 2.909060  | 0.069272  | 3.525095  |
|                                                                  | H | 1.506665  | -0.475079 | 2.637335  |
| III                                                              | U | -0.226950 | 0.915506  | -1.609691 |
|                                                                  | H | 3.423841  | 2.423692  | -1.187188 |
|                                                                  | N | 1.625258  | 1.494920  | -0.905154 |
|                                                                  | C | 2.787175  | 1.845226  | -0.504296 |
|                                                                  | C | 3.410533  | 1.520777  | 0.815090  |
|                                                                  | C | 2.534274  | 0.848960  | 1.873984  |
|                                                                  | H | 4.284060  | 0.896318  | 0.567324  |
|                                                                  | H | 3.857514  | 2.451045  | 1.194002  |
|                                                                  | C | 1.536862  | 1.798744  | 2.546293  |
|                                                                  | H | 2.054853  | 2.615124  | 3.056862  |
|                                                                  | H | 0.846732  | 2.249788  | 1.826390  |
|                                                                  | H | 0.940714  | 1.271369  | 3.294208  |
|                                                                  | H | 3.193488  | 0.425174  | 2.635935  |
|                                                                  | H | 2.009856  | -0.001886 | 1.425116  |
| TSIII→IV                                                         | U | 0.223276  | 3.125176  | 0.233103  |
|                                                                  | H | 2.788691  | 1.103610  | -0.275739 |
|                                                                  | N | 0.679820  | 1.373576  | -0.659629 |
|                                                                  | C | 1.864354  | 1.655666  | -0.149001 |
|                                                                  | C | 1.866062  | 2.093704  | 1.794057  |
|                                                                  | C | 0.905304  | 1.347872  | 2.734475  |
|                                                                  | H | 2.868195  | 1.679288  | 1.869811  |
|                                                                  | H | 1.989613  | 3.166554  | 2.076853  |
|                                                                  | C | -0.562854 | 1.819843  | 2.694428  |
|                                                                  | H | -0.669717 | 2.907439  | 2.861095  |
|                                                                  | H | -1.094506 | 1.508180  | 1.775061  |
|                                                                  | H | -1.149120 | 1.358202  | 3.491184  |
|                                                                  | H | 1.270691  | 1.447747  | 3.762069  |
|                                                                  | H | 0.935004  | 0.282485  | 2.493541  |
| IV                                                               | U | 0.600676  | 2.630279  | -0.067341 |
|                                                                  | H | 3.559738  | 1.207601  | -0.944353 |
|                                                                  | N | 1.552793  | 0.768582  | -0.422867 |
|                                                                  | C | 2.544969  | 1.499891  | -0.663752 |
|                                                                  | C | 1.230562  | 3.202906  | 2.092771  |
|                                                                  | C | 0.173918  | 2.199096  | 2.589998  |
|                                                                  | H | 2.244357  | 2.930251  | 2.394986  |
|                                                                  | H | 1.018414  | 4.221007  | 2.438900  |
|                                                                  | C | -1.252337 | 2.766250  | 2.618761  |
|                                                                  | H | -1.314610 | 3.600647  | 3.319852  |
|                                                                  | H | -1.590434 | 3.176015  | 1.645383  |
|                                                                  | H | -1.987492 | 2.011461  | 2.901608  |
|                                                                  | H | 0.433372  | 1.774862  | 3.562978  |
|                                                                  | H | 0.182817  | 1.272865  | 1.949862  |
| HCN                                                              | C | 0.000000  | 0.000000  | -0.498334 |
|                                                                  | H | 0.000000  | 0.000000  | -1.564845 |
|                                                                  | N | -0.000000 | 0.000000  | 0.650693  |
| [UCH <sub>2</sub> CH <sub>2</sub> CH <sub>3</sub> ] <sup>+</sup> | U | 0.839797  | 2.099447  | -0.055278 |
|                                                                  | C | 1.133302  | 3.214047  | 1.932820  |
|                                                                  | C | 0.157877  | 2.271494  | 2.656764  |

|  |   |           |          |          |
|--|---|-----------|----------|----------|
|  | H | 2.171628  | 3.064912 | 2.266994 |
|  | H | 0.877784  | 4.269671 | 2.056501 |
|  | C | -1.291288 | 2.765831 | 2.669915 |
|  | H | -1.357411 | 3.710951 | 3.212775 |
|  | H | -1.681942 | 2.961143 | 1.659340 |
|  | H | -1.959184 | 2.044790 | 3.144033 |
|  | H | 0.501536  | 2.024887 | 3.663942 |
|  | H | 0.170982  | 1.246847 | 2.172591 |

Table 4.6:  $[\text{UH}]^+ + \text{CH}_3\text{CH}_2\text{CH}_2\text{CN}$  PBE1PBE/SDD/6-311+g(d,p) Triplet Spin Energies (Hartree)

| Structure                                                        | E0         | E_ZPE  | E_tot  | H_corr | G_corr  | E0+E_ZPE   | E0+E_tot   | E0+H_corr  | E0+G_corr  |
|------------------------------------------------------------------|------------|--------|--------|--------|---------|------------|------------|------------|------------|
| $[\text{UH}]^+$                                                  | -477.06589 | .00353 | .00589 | .00684 | -.01891 | -477.06236 | -477.06000 | -477.05905 | -477.08480 |
| $\text{CH}_3\text{CH}_2\text{CH}_2\text{CN}$                     | -211.17680 | .10305 | .10900 | .10995 | .07408  | -211.07375 | -211.06780 | -211.06685 | -211.10272 |
| $[\text{UH}]^+ + \text{CH}_3\text{CH}_2\text{CH}_2\text{CN}$ (I) | -688.24269 | .10658 | .11490 | .11678 | .05517  | -688.13611 | -688.12779 | -688.12591 | -688.18752 |
| II                                                               | -688.36466 | .10709 | .11587 | .11682 | .06918  | -688.25757 | -688.24879 | -688.24785 | -688.29548 |
| TSII→III                                                         | -688.34937 | .10795 | .11567 | .11661 | .07143  | -688.24142 | -688.23370 | -688.23276 | -688.27794 |
| III                                                              | -688.39343 | .11436 | .12235 | .12330 | .07734  | -688.27906 | -688.27107 | -688.27013 | -688.31609 |
| TSIII→IV                                                         | -688.34343 | .10971 | .11712 | .11807 | .07500  | -688.23371 | -688.22630 | -688.22536 | -688.26843 |
| IV                                                               | -688.37748 | .10855 | .11707 | .11801 | .07244  | -688.26893 | -688.26041 | -688.25947 | -688.30504 |
| HCN                                                              | -93.33544  | .01649 | .01903 | .01997 | -.00287 | -93.31895  | -93.31641  | -93.31547  | -93.33831  |
| $[\text{UCH}_2\text{CH}_2\text{CH}_3]^+$                         | -594.97030 | .09013 | .09593 | .09688 | .05772  | -594.88018 | -594.87437 | -594.87343 | -594.91258 |
| $[\text{UCH}_2\text{CH}_2\text{CH}_3]^+ + \text{HCN}$ (V)        | -688.30574 | .10662 | .11496 | .11685 | .05485  | -688.19912 | -688.19078 | -688.18889 | -688.25089 |

Table 4.6.1:  $[\text{UH}]^+ + \text{CH}_3\text{CH}_2\text{CH}_2\text{CN}$  B3LYP/SDD/6-311+g(d,p) Triplet Spin Structure Coordinates

| Structure                                    | Coordinates |           |           |           |
|----------------------------------------------|-------------|-----------|-----------|-----------|
| $[\text{UH}]^+$                              | U           | -0.280565 | 0.018185  | 0.010435  |
|                                              | H           | -0.735512 | 1.225240  | 1.497931  |
| $\text{CH}_3\text{CH}_2\text{CH}_2\text{CN}$ | C           | -2.513350 | -0.394731 | 0.089606  |
|                                              | C           | -1.430125 | 0.651711  | 0.299570  |
|                                              | C           | -0.038341 | 0.099404  | -0.027597 |
|                                              | C           | 1.018885  | 1.080285  | 0.165007  |
|                                              | N           | 1.843719  | 1.869872  | 0.322588  |
|                                              | H           | -2.352853 | -1.268753 | 0.728890  |
|                                              | H           | -3.499479 | 0.012196  | 0.326398  |
|                                              | H           | -2.537774 | -0.740716 | -0.948687 |
|                                              | H           | -1.621486 | 1.527527  | -0.328203 |
|                                              | H           | -1.438102 | 1.003772  | 1.335793  |
|                                              | H           | 0.184209  | -0.770412 | 0.600718  |
|                                              | H           | 0.000569  | -0.245177 | -1.067148 |
| II                                           | U           | 0.617889  | -0.132557 | -1.242898 |
|                                              | H           | -0.150717 | 1.638345  | -0.823381 |
|                                              | N           | 2.630661  | 0.278362  | -0.956264 |
|                                              | C           | 2.383594  | 0.101438  | 0.261688  |
|                                              | C           | 3.162398  | 0.172970  | 1.516011  |
|                                              | C           | 2.322638  | 0.274870  | 2.785787  |
|                                              | H           | 3.778196  | -0.738772 | 1.523045  |
|                                              | H           | 3.866044  | 1.010782  | 1.424458  |
|                                              | C           | 1.531257  | 1.571333  | 2.869508  |
|                                              | H           | 2.194277  | 2.441582  | 2.862968  |
|                                              | H           | 0.839336  | 1.683364  | 2.025446  |
|                                              | H           | 0.939481  | 1.613447  | 3.786317  |

|          |   |           |           |           |
|----------|---|-----------|-----------|-----------|
|          | H | 2.996717  | 0.194983  | 3.643302  |
|          | H | 1.652044  | -0.590472 | 2.846007  |
| TSII→III | U | 0.686045  | 0.337244  | -1.337764 |
|          | H | 1.560791  | 1.599181  | -0.066565 |
|          | N | 2.560086  | -0.318645 | -0.978277 |
|          | C | 2.309228  | 0.164792  | 0.197391  |
|          | C | 3.122893  | 0.262771  | 1.432180  |
|          | C | 2.339170  | 0.322999  | 2.743315  |
|          | H | 3.803612  | -0.595793 | 1.423301  |
|          | H | 3.758974  | 1.152436  | 1.322629  |
|          | C | 1.450034  | 1.547607  | 2.899676  |
|          | H | 2.022081  | 2.474759  | 2.796012  |
|          | H | 0.644153  | 1.573415  | 2.157438  |
|          | H | 0.978233  | 1.558942  | 3.884790  |
|          | H | 3.069434  | 0.300035  | 3.557860  |
|          | H | 1.745812  | -0.592431 | 2.848671  |
| III      | U | -0.249233 | 0.970453  | -1.478394 |
|          | H | 3.426676  | 2.428752  | -1.180621 |
|          | N | 1.625272  | 1.516496  | -0.872329 |
|          | C | 2.794153  | 1.854630  | -0.489453 |
|          | C | 3.416622  | 1.517844  | 0.817164  |
|          | C | 2.536047  | 0.841827  | 1.856191  |
|          | H | 4.290226  | 0.895876  | 0.561828  |
|          | H | 3.866138  | 2.443672  | 1.206006  |
|          | C | 1.536265  | 1.784043  | 2.515033  |
|          | H | 2.047889  | 2.597591  | 3.037485  |
|          | H | 0.858817  | 2.243083  | 1.786540  |
|          | H | 0.926054  | 1.256059  | 3.251651  |
|          | H | 3.185150  | 0.411713  | 2.624082  |
|          | H | 2.018134  | -0.007282 | 1.393692  |
| TSIII→IV | U | 0.232403  | 3.020918  | 0.267818  |
|          | H | 2.855511  | 1.131677  | -0.275972 |
|          | N | 0.744710  | 1.321349  | -0.685598 |
|          | C | 1.907542  | 1.652344  | -0.175093 |
|          | C | 1.851278  | 2.100468  | 1.770418  |
|          | C | 0.881432  | 1.364363  | 2.702183  |
|          | H | 2.846996  | 1.669527  | 1.861467  |
|          | H | 1.984124  | 3.177060  | 2.049577  |
|          | C | -0.577628 | 1.848749  | 2.726954  |
|          | H | -0.678793 | 2.922656  | 2.955702  |
|          | H | -1.159396 | 1.580111  | 1.821328  |
|          | H | -1.132554 | 1.336542  | 3.516106  |
|          | H | 1.268157  | 1.441252  | 3.724594  |
|          | H | 0.891032  | 0.302326  | 2.441824  |
| IV       | U | 0.601025  | 2.675160  | -0.025034 |
|          | H | 3.474567  | 1.164976  | -0.802173 |
|          | N | 1.437493  | 0.801394  | -0.371968 |
|          | C | 2.467928  | 1.511931  | -0.554882 |
|          | C | 1.252553  | 3.219164  | 2.107028  |
|          | C | 0.204868  | 2.198831  | 2.547658  |
|          | H | 2.267137  | 2.945158  | 2.406685  |
|          | H | 1.024104  | 4.226344  | 2.476345  |
|          | C | -1.218391 | 2.750921  | 2.561376  |
|          | H | -1.302138 | 3.558622  | 3.291989  |
|          | H | -1.539900 | 3.204790  | 1.599771  |
|          | H | -1.958237 | 1.982906  | 2.793725  |
|          | H | 0.445455  | 1.733490  | 3.507500  |
|          | H | 0.240277  | 1.288025  | 1.878767  |
| HCN      | C | 0.000000  | 0.000000  | -0.497856 |
|          | H | 0.000000  | 0.000000  | -1.566083 |
|          | N | -0.000000 | -0.000000 | 0.650460  |

|                                                                  |   |           |          |          |
|------------------------------------------------------------------|---|-----------|----------|----------|
| [UCH <sub>2</sub> CH <sub>2</sub> CH <sub>3</sub> ] <sup>+</sup> | U | 0.502834  | 2.176129 | 0.041740 |
|                                                                  | C | 1.163109  | 3.207397 | 1.969234 |
|                                                                  | C | 0.188562  | 2.279257 | 2.693473 |
|                                                                  | H | 2.209504  | 2.992337 | 2.226578 |
|                                                                  | H | 0.954904  | 4.264196 | 2.161831 |
|                                                                  | C | -1.256778 | 2.753085 | 2.601432 |
|                                                                  | H | -1.362213 | 3.731689 | 3.074679 |
|                                                                  | H | -1.611818 | 2.907751 | 1.558558 |
|                                                                  | H | -1.955201 | 2.052073 | 3.062151 |
|                                                                  | H | 0.473908  | 2.077180 | 3.729015 |
|                                                                  | H | 0.256268  | 1.232924 | 2.261707 |

Table 4.7.1: [UH]<sup>+</sup> + CH<sub>3</sub>CH<sub>2</sub>CH<sub>2</sub>CN B3LYP/SDD/6-311+g(d,p) Quintet Spin Relative Energies (kJ/mol)

| Structure     | EO+E_ZPE | EO+E_tot | EO+H_cor<br>r | EO+G_cor<br>r |
|---------------|----------|----------|---------------|---------------|
| Reactants (I) | 0        | 0        | 0             | 0             |
| II            | -213.062 | -211.594 | -214.075      | -179.075      |
| TSII → III    | -161.182 | -163.826 | -166.307      | -118.119      |
| III           | -303.269 | -304.309 | -306.79       | -264.745      |
| TSIII → IV    | -150.365 | -151.447 | -153.928      | -109.439      |
| IV            | -217.756 | -216.249 | -218.728      | -179.54       |
| Products (V)  | -111.442 | -110.765 | -110.767      | -114.81       |

Table 4.7.2: [UH]<sup>+</sup> + CH<sub>3</sub>CH<sub>2</sub>CH<sub>2</sub>CN PBE1PBE/SDD/6-311+g(d,p) Quintet Spin Relative Energies (kJ/mol)

| Structure     | EO+E_ZPE | EO+E_tot | EO+H_cor<br>r | EO+G_cor<br>r |
|---------------|----------|----------|---------------|---------------|
| Reactants (I) | 0        | 0        | 0             | 0             |
| II            | -171.92  | -170.899 | -173.378      | -136.025      |
| TSII → III    | -143.835 | -145.324 | -147.803      | -104.566      |
| III           | -261.613 | -262.697 | -265.176      | -222.952      |
| TSIII → IV    | -126.077 | -128.392 | -130.871      | -82.572       |
| IV            | -185.641 | -184.599 | -187.075      | -146.243      |
| Products (V)  | -51.9875 | -51.9271 | -51.9271      | -52.9117      |

Table 4.7.3: [UH]<sup>+</sup> + CH<sub>3</sub>CH<sub>2</sub>CH<sub>2</sub>CN B3LYP/SDD/6-311+g(d,p) Singlet Spin Relative Energies (kJ/mol)

| Structure     | EO+E_ZPE | EO+E_tot | EO+H_cor<br>r | EO+G_cor<br>r |
|---------------|----------|----------|---------------|---------------|
| Reactants (I) | 165.1177 | 165.1203 | 165.1177      | 169.1373      |
| II            | -92.3651 | -92.0107 | -94.4918      | -51.1027      |
| TSII → III    | -32.4354 | -34.4544 | -36.9355      | 11.22926      |
| III           | -85.8434 | -88.5424 | -91.0235      | -37.7547      |
| TSIII → IV    | -28.4683 | -31.7318 | -34.2129      | 20.54454      |
| IV            | -124.722 | -124.155 | -126.636      | -81.3669      |

|              |          |          |          |          |
|--------------|----------|----------|----------|----------|
| Products (V) | 108.8821 | 109.0003 | 108.9976 | 111.5129 |
|--------------|----------|----------|----------|----------|

Table 4.7.4: [UH]<sup>+</sup> + CH<sub>3</sub>CH<sub>2</sub>CH<sub>2</sub>CN PBE1PBE/SDD/6-311+g(d,p) Singlet Spin Relative Energies (kJ/mol)

| Structure     | E0+E_ZPE | E0+E_tot | E0+H_cor<br>r | E0+G_cor<br>r |
|---------------|----------|----------|---------------|---------------|
| Reactants (I) | 267.1394 | 267.1394 | 267.1394      | 271.1564      |
| II            | -49.0995 | -48.7424 | -51.2183      | -7.70322      |
| TSII → III    | -7.85025 | -9.95065 | -12.4265      | 35.43113      |
| III           | -60.0399 | -63.2247 | -65.7031      | -11.0927      |
| TSIII → IV    | 0.477841 | -2.36032 | -4.83617      | 48.68465      |
| IV            | -91.0655 | -90.9605 | -93.4389      | -46.4031      |
| Products (V)  | 187.1036 | 186.8148 | 186.8148      | 190.6691      |

Table 4.7.5: [UH]<sup>+</sup> + CH<sub>3</sub>CH<sub>2</sub>CH<sub>2</sub>CN B3LYP/SDD/6-311+g(d,p) Triplet Spin Relative Energies (kJ/mol)

| Structure     | E0+E_ZPE | E0+E_tot | E0+H_cor<br>r | E0+G_cor<br>r |
|---------------|----------|----------|---------------|---------------|
| Reactants (I) | 137.1036 | 137.1062 | 137.1036      | 138.4216      |
| II            | -214.543 | -213.445 | -215.926      | -176.812      |
| TSII → III    | -154.335 | -155.823 | -158.302      | -113.495      |
| III           | -279.579 | -280.464 | -282.942      | -240.262      |
| TSIII → IV    | -139.566 | -141.948 | -144.429      | -94.3158      |
| IV            | -233.541 | -232.294 | -234.775      | -193.72       |
| Products (V)  | -87.1115 | -86.442  | -86.4446      | -89.2355      |

Table 4.7.6: [UH]<sup>+</sup> + CH<sub>3</sub>CH<sub>2</sub>CH<sub>2</sub>CN PBE1PBE/SDD/6-311+g(d,p) Triplet Spin Relative Energies (kJ/mol)

| Structure     | E0+E_ZPE | E0+E_tot | E0+H_cor<br>r | E0+G_cor<br>r |
|---------------|----------|----------|---------------|---------------|
| Reactants (I) | 144.2844 | 144.2896 | 144.2896      | 145.5         |
| II            | -174.619 | -173.385 | -175.864      | -137.954      |
| TSII → III    | -132.218 | -133.767 | -136.245      | -91.903       |
| III           | -231.041 | -231.892 | -234.371      | -192.063      |
| TSIII → IV    | -111.98  | -114.348 | -116.827      | -66.924       |
| IV            | -204.432 | -203.902 | -206.377      | -163.041      |
| Products (V)  | -21.1589 | -21.088  | -21.088       | -20.8806      |

Figure 6: [UH]<sup>+</sup> + CH<sub>3</sub>CH<sub>2</sub>CH<sub>2</sub>CN B3LYP/SDD/6-311+g(d,p) Relative Enthalpy (kJ/mol)

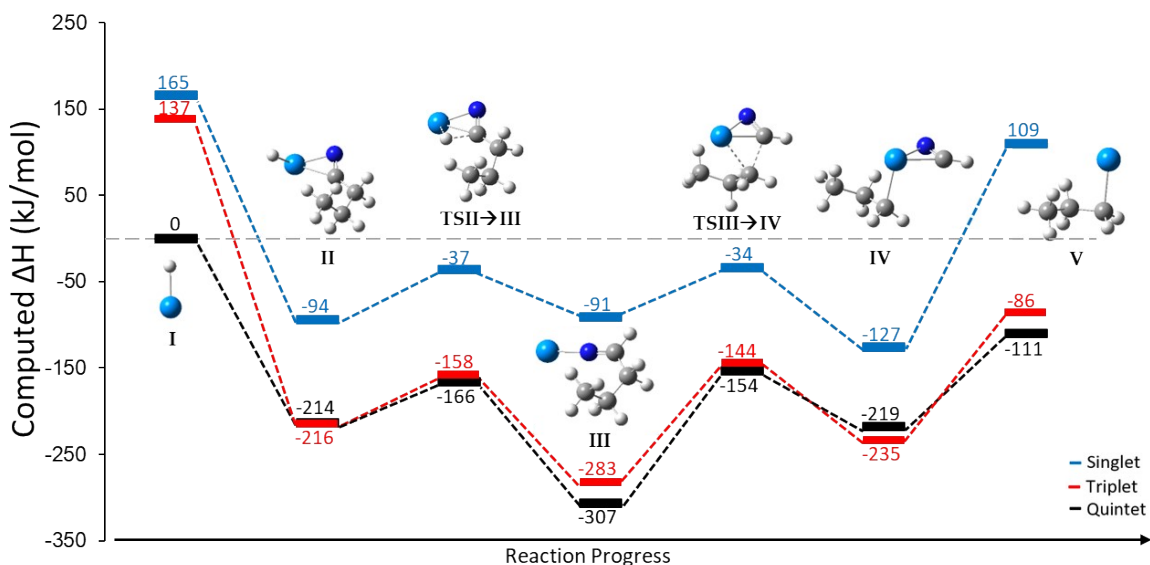

Figure 6.1: [UH]<sup>+</sup> + CH<sub>3</sub>CH<sub>2</sub>CH<sub>2</sub>CN PBE1PBE/SDD/6-311+g(d,p) Relative Enthalpy (kJ/mol)

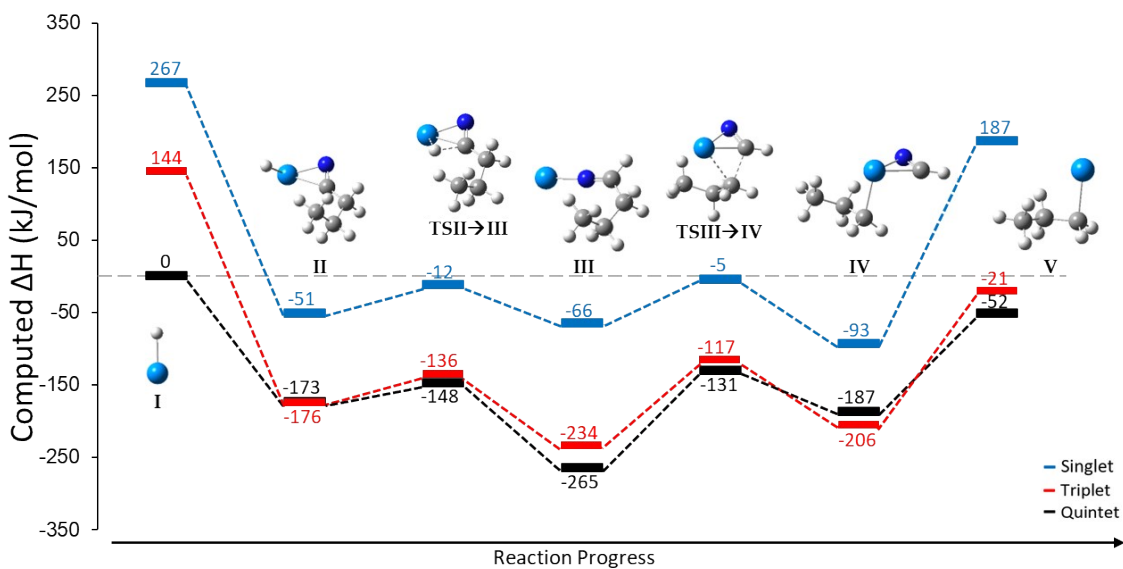

Table 5.1: [UH]<sup>+</sup> + C<sub>6</sub>H<sub>5</sub>CN B3LYP/SDD/6-311+g(d,p) Quintet Spin Energies (Hartree)

| Structure                                                | E0         | E_ZPE  | E_tot  | H_corr | G_corr  | E0+E_ZPE   | E0+E_tot   | E0+H_corr  | E0+G_corr  |
|----------------------------------------------------------|------------|--------|--------|--------|---------|------------|------------|------------|------------|
| [UH] <sup>+</sup>                                        | -477.20060 | .00371 | .00608 | .00702 | -.01919 | -477.19689 | -477.19453 | -477.19358 | -477.21980 |
| C <sub>6</sub> H <sub>5</sub> CN                         | -324.57776 | .09886 | .10496 | .10590 | .06860  | -324.47890 | -324.47280 | -324.47186 | -324.50916 |
| [UH] <sup>+</sup> + C <sub>6</sub> H <sub>5</sub> CN (I) | -801.77836 | .10257 | .11103 | .11292 | .04941  | -801.67579 | -801.66733 | -801.66544 | -801.72896 |
| II                                                       | -801.86635 | .10353 | .11261 | .11355 | .06445  | -801.76282 | -801.75375 | -801.75280 | -801.80190 |
| TSII→III                                                 | -801.85081 | .10357 | .11171 | .11265 | .06592  | -801.74725 | -801.73911 | -801.73816 | -801.78489 |
| III                                                      | -801.91353 | .11094 | .11908 | .12003 | .07285  | -801.80259 | -801.79445 | -801.79350 | -801.84068 |

|                                                          |            |        |        |        |         |            |            |            |            |
|----------------------------------------------------------|------------|--------|--------|--------|---------|------------|------------|------------|------------|
| TSIII→IV                                                 | -801.84755 | .10620 | .11449 | .11543 | .06848  | -801.74135 | -801.73306 | -801.73211 | -801.77906 |
| IV                                                       | -801.86884 | .10528 | .11479 | .11574 | .06504  | -801.76356 | -801.75405 | -801.75311 | -801.80381 |
| HCN                                                      | -93.45449  | .01636 | .01890 | .01985 | -.00300 | -93.43813  | -93.43559  | -93.43465  | -93.45749  |
| [UC <sub>6</sub> H <sub>5</sub> ] <sup>+</sup>           | -708.37166 | .08839 | .09467 | .09561 | .05346  | -708.28328 | -708.27700 | -708.27605 | -708.31820 |
| [UC <sub>6</sub> H <sub>5</sub> ] <sup>+</sup> + HCN (V) | -801.82616 | .10475 | .11357 | .11546 | .05046  | -801.72141 | -801.71259 | -801.71070 | -801.77570 |

Table 5.1.1: [UH]<sup>+</sup> + C<sub>6</sub>H<sub>5</sub>CN B3LYP/SDD/6-311+g(d,p) Quintet Spin Structure Coordinates

| Structure                        | Coordinates |           |           |           |
|----------------------------------|-------------|-----------|-----------|-----------|
| [UH] <sup>+</sup>                | U           | 0.000000  | 0.000000  | 0.021045  |
|                                  | H           | 0.000000  | 0.000000  | -1.936098 |
| C <sub>6</sub> H <sub>5</sub> CN | C           | -1.055947 | 0.491891  | 2.538959  |
|                                  | C           | 0.012079  | 0.288629  | 3.426226  |
|                                  | C           | 0.319458  | 1.263129  | 4.368751  |
|                                  | C           | -0.429975 | 2.438154  | 4.432931  |
|                                  | C           | -1.491221 | 2.640988  | 3.551891  |
|                                  | C           | -1.808457 | 1.673241  | 2.604426  |
|                                  | H           | 0.587893  | -0.626722 | 3.368545  |
|                                  | H           | 1.144135  | 1.106670  | 5.054186  |
|                                  | H           | -0.185961 | 3.194753  | 5.169870  |
|                                  | H           | -2.073506 | 3.553624  | 3.601569  |
|                                  | H           | -2.631243 | 1.823115  | 1.916425  |
|                                  | C           | -1.376868 | -0.508430 | 1.566180  |
|                                  | N           | -1.635176 | -1.316419 | 0.781279  |
| II                               | U           | -2.161000 | 0.071976  | 0.284512  |
|                                  | H           | -1.953291 | 1.233563  | -1.350101 |
|                                  | N           | -0.059596 | -0.655525 | 0.467581  |
|                                  | C           | 0.306835  | 0.353496  | 1.047764  |
|                                  | C           | 1.396404  | 1.081126  | 1.633971  |
|                                  | C           | 2.681723  | 0.499558  | 1.616329  |
|                                  | C           | 3.747021  | 1.188163  | 2.176632  |
|                                  | C           | 3.544926  | 2.446199  | 2.750213  |
|                                  | C           | 2.274604  | 3.024654  | 2.767325  |
|                                  | C           | 1.199042  | 2.346237  | 2.211267  |
|                                  | H           | 2.824803  | -0.475110 | 1.166468  |
|                                  | H           | 4.736707  | 0.747894  | 2.166587  |
|                                  | H           | 4.383005  | 2.978444  | 3.184638  |
|                                  | H           | 2.127872  | 4.001401  | 3.211320  |
|                                  | H           | 0.210333  | 2.789784  | 2.215313  |
| TSII→III                         | U           | -1.920295 | -0.021046 | 0.108650  |
|                                  | H           | -0.807405 | 1.663138  | 0.346390  |
|                                  | N           | 0.132766  | -0.588367 | 0.173019  |
|                                  | C           | 0.351120  | 0.441724  | 0.849237  |
|                                  | C           | 1.434916  | 1.140088  | 1.492092  |
|                                  | C           | 2.679840  | 0.488207  | 1.600764  |
|                                  | C           | 3.731508  | 1.122737  | 2.246377  |
|                                  | C           | 3.556756  | 2.401650  | 2.779748  |
|                                  | C           | 2.325595  | 3.051657  | 2.671500  |
|                                  | C           | 1.264134  | 2.423561  | 2.035250  |
|                                  | H           | 2.803453  | -0.501706 | 1.178919  |
|                                  | H           | 4.690122  | 0.625184  | 2.330484  |
|                                  | H           | 4.383011  | 2.893827  | 3.279195  |
|                                  | H           | 2.198110  | 4.045214  | 3.083468  |
|                                  | H           | 0.306736  | 2.922228  | 1.940711  |
| III                              | U           | -0.533681 | -1.994178 | -0.715044 |
|                                  | H           | -0.724554 | 1.549973  | 0.973809  |
|                                  | N           | -0.066181 | -0.267046 | 0.288058  |

|                                                |   |           |           |           |
|------------------------------------------------|---|-----------|-----------|-----------|
|                                                | C | 0.119589  | 0.853103  | 0.905402  |
|                                                | C | 1.339090  | 1.312495  | 1.535283  |
|                                                | C | 2.523154  | 0.548654  | 1.542594  |
|                                                | C | 3.660154  | 1.038228  | 2.161270  |
|                                                | C | 3.633866  | 2.294262  | 2.781032  |
|                                                | C | 2.468901  | 3.061364  | 2.781542  |
|                                                | C | 1.325904  | 2.574335  | 2.161775  |
|                                                | H | 2.534692  | -0.421533 | 1.060910  |
|                                                | H | 4.571641  | 0.452876  | 2.168011  |
|                                                | H | 4.527378  | 2.672427  | 3.264116  |
|                                                | H | 2.455939  | 4.031520  | 3.262669  |
|                                                | H | 0.415685  | 3.164470  | 2.157591  |
| <b>TSIII→IV</b>                                | U | -2.345103 | 0.146893  | 0.533457  |
|                                                | H | 1.720067  | -0.480215 | -0.697515 |
|                                                | N | -0.436376 | -0.292396 | -1.189171 |
|                                                | C | 0.677659  | -0.376053 | -0.930850 |
|                                                | C | -0.752861 | 0.876134  | 2.032819  |
|                                                | C | 0.462679  | 0.625012  | 2.700737  |
|                                                | C | 0.908099  | 1.468337  | 3.710494  |
|                                                | C | 0.150777  | 2.586074  | 4.087646  |
|                                                | C | -1.060801 | 2.856650  | 3.464800  |
|                                                | C | -1.493462 | 1.994424  | 2.451555  |
|                                                | H | 1.059100  | -0.246421 | 2.446218  |
|                                                | H | 1.842578  | 1.260023  | 4.219220  |
|                                                | H | 0.508459  | 3.238370  | 4.875644  |
|                                                | H | -1.654743 | 3.713835  | 3.758691  |
|                                                | H | -2.460037 | 2.253632  | 1.981759  |
| <b>IV</b>                                      | U | -1.709006 | 0.158950  | 0.254847  |
|                                                | H | 1.212738  | 0.849383  | -1.670631 |
|                                                | N | 0.070574  | -0.810951 | -0.882743 |
|                                                | C | 0.413505  | 0.317847  | -1.154078 |
|                                                | C | -0.792363 | 0.696005  | 2.294640  |
|                                                | C | 0.136544  | 0.391132  | 3.308042  |
|                                                | C | 0.280074  | 1.228689  | 4.407130  |
|                                                | C | -0.491474 | 2.393541  | 4.521519  |
|                                                | C | -1.414009 | 2.728795  | 3.537584  |
|                                                | C | -1.551495 | 1.871652  | 2.441289  |
|                                                | H | 0.748502  | -0.501744 | 3.236710  |
|                                                | H | 0.996154  | 0.984623  | 5.183581  |
|                                                | H | -0.366899 | 3.039014  | 5.382998  |
|                                                | H | -2.010788 | 3.629158  | 3.621783  |
|                                                | H | -2.303630 | 2.175058  | 1.685821  |
| HCN                                            | C | 0.000000  | 0.000000  | -0.498334 |
|                                                | H | 0.000000  | 0.000000  | -1.564845 |
|                                                | N | -0.000000 | 0.000000  | 0.650693  |
| [UC <sub>6</sub> H <sub>5</sub> ] <sup>+</sup> | U | -1.619128 | 0.164753  | 0.203762  |
|                                                | C | -0.720398 | 0.738416  | 2.200776  |
|                                                | C | 0.231964  | 0.440728  | 3.195893  |
|                                                | C | 0.332274  | 1.239782  | 4.326384  |
|                                                | C | -0.510507 | 2.349084  | 4.492019  |
|                                                | C | -1.460134 | 2.668979  | 3.528984  |
|                                                | C | -1.551571 | 1.857277  | 2.394241  |
|                                                | H | 0.891660  | -0.413299 | 3.085424  |
|                                                | H | 1.066132  | 1.008227  | 5.089724  |
|                                                | H | -0.420171 | 2.963139  | 5.380370  |
|                                                | H | -2.111780 | 3.524959  | 3.655734  |
|                                                | H | -2.318279 | 2.145734  | 1.652696  |

Table 5.2: [UH]<sup>+</sup> + C<sub>6</sub>H<sub>5</sub>CN PBE1PBE/SDD/6-311+g(d,p) Quintet Spin Energies (Hartree)

| Structure                                                | E0         | E_ZPE  | E_tot  | H_corr | G_corr  | E0+E_ZPE   | E0+E_tot   | E0+H_corr  | E0+G_corr  |
|----------------------------------------------------------|------------|--------|--------|--------|---------|------------|------------|------------|------------|
| [UH] <sup>+</sup>                                        | -477.12109 | .00377 | .00614 | .00708 | -.01913 | -477.11732 | -477.11495 | -477.11401 | -477.14021 |
| C <sub>6</sub> H <sub>5</sub> CN                         | -324.18042 | .09961 | .10570 | .10664 | .06936  | -324.08081 | -324.07472 | -324.07378 | -324.11106 |
| [UH] <sup>+</sup> + C <sub>6</sub> H <sub>5</sub> CN (I) | -801.30151 | .10339 | .11183 | .11372 | .05023  | -801.19812 | -801.18967 | -801.18779 | -801.25127 |
| II                                                       | -801.37328 | .10443 | .11345 | .11439 | .06550  | -801.26885 | -801.25983 | -801.25889 | -801.30778 |
| TSII→III                                                 | -801.36438 | .10466 | .11271 | .11365 | .06712  | -801.25972 | -801.25167 | -801.25073 | -801.29726 |
| III                                                      | -801.41999 | .11173 | .11986 | .12080 | .07365  | -801.30826 | -801.30013 | -801.29918 | -801.34634 |
| TSIII→IV                                                 | -801.36248 | .10680 | .11501 | .11596 | .06946  | -801.25568 | -801.24747 | -801.24652 | -801.29302 |
| IV                                                       | -801.37767 | .10623 | .11563 | .11657 | .06640  | -801.27144 | -801.26204 | -801.26110 | -801.31127 |
| HCN                                                      | -93.33544  | .01649 | .01903 | .01997 | -.00287 | -93.31895  | -93.31641  | -93.31547  | -93.33831  |
| [UC <sub>6</sub> H <sub>5</sub> ] <sup>+</sup>           | -707.99054 | .08892 | .09514 | .09609 | .05417  | -707.90162 | -707.89539 | -707.89445 | -707.93636 |
| [UC <sub>6</sub> H <sub>5</sub> ] <sup>+</sup> + HCN (V) | -801.32597 | .10541 | .11417 | .11606 | .05131  | -801.22056 | -801.21181 | -801.20992 | -801.27467 |

Table 5.2.1: [UH]<sup>+</sup> + C<sub>6</sub>H<sub>5</sub>CN PBE1PBE/SDD/6-311+g(d,p) Quintet Spin Structure Coordinates

| Structure                        | Coordinates |           |           |           |
|----------------------------------|-------------|-----------|-----------|-----------|
| [UH] <sup>+</sup>                | U           | -0.282792 | 0.024095  | 0.017719  |
|                                  | H           | -0.733284 | 1.219330  | 1.490648  |
| C <sub>6</sub> H <sub>5</sub> CN | C           | -1.054586 | 0.494902  | 2.542305  |
|                                  | C           | 0.009974  | 0.290792  | 3.425682  |
|                                  | C           | 0.316578  | 1.262988  | 4.365902  |
|                                  | C           | -0.430932 | 2.434561  | 4.429598  |
|                                  | C           | -1.489871 | 2.637178  | 3.550649  |
|                                  | C           | -1.806101 | 1.672161  | 2.605991  |
|                                  | H           | 0.585621  | -0.625896 | 3.366956  |
|                                  | H           | 1.142065  | 1.105662  | 5.051529  |
|                                  | H           | -0.187126 | 3.192135  | 5.166963  |
|                                  | H           | -2.072462 | 3.550623  | 3.600568  |
|                                  | H           | -2.629208 | 1.819719  | 1.916153  |
|                                  | C           | -1.374792 | -0.502883 | 1.571847  |
|                                  | N           | -1.633949 | -1.309317 | 0.787096  |
| II                               | U           | -2.109168 | 0.083336  | 0.323645  |
|                                  | H           | -1.876672 | 1.300821  | -1.250590 |
|                                  | N           | -0.033680 | -0.672473 | 0.449949  |
|                                  | C           | 0.308515  | 0.343663  | 1.036120  |
|                                  | C           | 1.392365  | 1.073867  | 1.623614  |
|                                  | C           | 2.672943  | 0.494450  | 1.615839  |
|                                  | C           | 3.731564  | 1.185718  | 2.177528  |
|                                  | C           | 3.524091  | 2.443223  | 2.741246  |
|                                  | C           | 2.256544  | 3.019440  | 2.747770  |
|                                  | C           | 1.188305  | 2.337559  | 2.190455  |
|                                  | H           | 2.818121  | -0.483511 | 1.170770  |
|                                  | H           | 4.722995  | 0.746787  | 2.175830  |
|                                  | H           | 4.359658  | 2.979621  | 3.178159  |
|                                  | H           | 2.106298  | 3.999615  | 3.185436  |
| TSII→III                         | U           | -1.890774 | 0.011156  | 0.179734  |
|                                  | H           | -0.828082 | 1.711085  | 0.304723  |
|                                  | N           | 0.148916  | -0.591354 | 0.166350  |
|                                  | C           | 0.362964  | 0.434065  | 0.847310  |
|                                  | C           | 1.441831  | 1.131113  | 1.492084  |
|                                  | C           | 2.683381  | 0.484313  | 1.602049  |
|                                  | C           | 3.728557  | 1.121954  | 2.248028  |
|                                  | C           | 3.546675  | 2.397381  | 2.778131  |

|                                                |   |           |           |           |
|------------------------------------------------|---|-----------|-----------|-----------|
|                                                | C | 2.317104  | 3.042018  | 2.667066  |
|                                                | C | 1.262346  | 2.410156  | 2.030487  |
|                                                | H | 2.809498  | -0.506460 | 1.179543  |
|                                                | H | 4.690141  | 0.628536  | 2.335314  |
|                                                | H | 4.370768  | 2.893805  | 3.279373  |
|                                                | H | 2.185646  | 4.036771  | 3.077486  |
|                                                | H | 0.301395  | 2.903558  | 1.928126  |
| III                                            | U | -0.498466 | -1.979809 | -0.696154 |
|                                                | H | -0.723523 | 1.553588  | 0.976231  |
|                                                | N | -0.057092 | -0.260404 | 0.294252  |
|                                                | C | 0.123022  | 0.857903  | 0.909033  |
|                                                | C | 1.338983  | 1.314835  | 1.536509  |
|                                                | C | 2.516486  | 0.549654  | 1.540910  |
|                                                | C | 3.652149  | 1.035652  | 2.157239  |
|                                                | C | 3.627229  | 2.288275  | 2.775723  |
|                                                | C | 2.467053  | 3.056185  | 2.778315  |
|                                                | C | 1.325617  | 2.572319  | 2.160769  |
|                                                | H | 2.522698  | -0.421165 | 1.057157  |
|                                                | H | 4.563844  | 0.448813  | 2.163216  |
|                                                | H | 4.522658  | 2.665208  | 3.258731  |
|                                                | H | 2.456705  | 4.026907  | 3.260577  |
|                                                | H | 0.414213  | 3.162990  | 2.156510  |
| TSIII→IV                                       | U | -2.117364 | -0.329609 | 0.744662  |
|                                                | H | 0.875757  | 0.864929  | -0.387435 |
|                                                | N | -0.498797 | -0.793511 | -0.618050 |
|                                                | C | -0.032406 | 0.288199  | -0.233235 |
|                                                | C | -0.429529 | 0.836456  | 1.799083  |
|                                                | C | 0.598967  | 0.480759  | 2.681691  |
|                                                | C | 0.857939  | 1.279774  | 3.790798  |
|                                                | C | 0.110709  | 2.432853  | 4.022812  |
|                                                | C | -0.902882 | 2.807174  | 3.144018  |
|                                                | C | -1.156233 | 2.018546  | 2.027683  |
|                                                | H | 1.190030  | -0.415095 | 2.510838  |
|                                                | H | 1.650093  | 1.003774  | 4.479121  |
|                                                | H | 0.332183  | 3.054185  | 4.883550  |
|                                                | H | -1.460806 | 3.722784  | 3.308944  |
|                                                | H | -1.891625 | 2.373080  | 1.291022  |
| IV                                             | U | -1.714336 | -0.019095 | 0.355632  |
|                                                | H | 0.949783  | 1.231086  | -1.571172 |
|                                                | N | 0.133116  | -0.645826 | -0.870200 |
|                                                | C | 0.269333  | 0.539950  | -1.072058 |
|                                                | C | -0.790872 | 0.541031  | 2.360694  |
|                                                | C | 0.091906  | 0.275931  | 3.419582  |
|                                                | C | 0.260509  | 1.198188  | 4.439597  |
|                                                | C | -0.438456 | 2.409558  | 4.428231  |
|                                                | C | -1.313879 | 2.708355  | 3.396571  |
|                                                | C | -1.475044 | 1.764747  | 2.381764  |
|                                                | H | 0.649138  | -0.655572 | 3.445607  |
|                                                | H | 0.942591  | 0.983748  | 5.255847  |
|                                                | H | -0.293884 | 3.122175  | 5.233116  |
|                                                | H | -1.857868 | 3.646351  | 3.383505  |
|                                                | H | -2.193610 | 2.050525  | 1.581775  |
| HCN                                            | C | 0.000000  | 0.000000  | -0.497856 |
|                                                | H | 0.000000  | 0.000000  | -1.566083 |
|                                                | N | -0.000000 | -0.000000 | 0.650460  |
| [UC <sub>6</sub> H <sub>5</sub> ] <sup>+</sup> | U | -1.619128 | 0.164753  | 0.203762  |
|                                                | C | -0.720398 | 0.738416  | 2.200776  |
|                                                | C | 0.231964  | 0.440728  | 3.195893  |
|                                                | C | 0.332274  | 1.239782  | 4.326384  |
|                                                | C | -0.510507 | 2.349084  | 4.492019  |
|                                                | C | -1.460134 | 2.668979  | 3.528984  |
|                                                | C | -1.551571 | 1.857277  | 2.394241  |

|  |   |           |           |          |
|--|---|-----------|-----------|----------|
|  | H | 0.891660  | -0.413299 | 3.085424 |
|  | H | 1.066132  | 1.008227  | 5.089724 |
|  | H | -0.420171 | 2.963139  | 5.380370 |
|  | H | -2.111780 | 3.524959  | 3.655734 |
|  | H | -2.318279 | 2.145734  | 1.652696 |

Table 5.3:  $[\text{UH}]^+ + \text{C}_6\text{H}_5\text{CN}$  B3LYP/SDD/6-311+g(d,p) Singlet Spin Energies (Hartree)

| Structure                                           | E0         | E_ZPE  | E_tot  | H_corr | G_corr  | E0+E_ZPE   | E0+E_tot   | E0+H_corr  | E0+G_corr  |
|-----------------------------------------------------|------------|--------|--------|--------|---------|------------|------------|------------|------------|
| $[\text{UH}]^+$                                     | -477.13768 | .00368 | .00605 | .00699 | -.01769 | -477.13400 | -477.13164 | -477.13069 | -477.15538 |
| $\text{C}_6\text{H}_5\text{CN}$                     | -324.57776 | .09886 | .10496 | .10590 | .06860  | -324.47890 | -324.47280 | -324.47186 | -324.50916 |
| $[\text{UH}]^+ + \text{C}_6\text{H}_5\text{CN}$ (I) | -801.71544 | .10254 | .11100 | .11289 | .05091  | -801.61290 | -801.60444 | -801.60255 | -801.66453 |
| II                                                  | -801.82619 | .10409 | .11273 | .11368 | .06780  | -801.72211 | -801.71346 | -801.71251 | -801.75839 |
| TSII→III                                            | -801.80007 | .10421 | .11204 | .11298 | .06860  | -801.69586 | -801.68803 | -801.68709 | -801.73147 |
| III                                                 | -801.84095 | .10912 | .11673 | .11767 | .07458  | -801.73183 | -801.72422 | -801.72327 | -801.76637 |
| TSIII→IV                                            | -801.80312 | .10674 | .11465 | .11560 | .07098  | -801.69638 | -801.68847 | -801.68753 | -801.73215 |
| IV                                                  | -801.83312 | .10601 | .11520 | .11614 | .06759  | -801.72711 | -801.71792 | -801.71698 | -801.76554 |
| HCN                                                 | -93.45449  | .01636 | .01890 | .01985 | -.00300 | -93.43813  | -93.43559  | -93.43465  | -93.45749  |
| $[\text{UC}_6\text{H}_5]^+$                         | -708.28231 | .08817 | .09449 | .09543 | .05469  | -708.19414 | -708.18782 | -708.18687 | -708.22762 |
| $[\text{UC}_6\text{H}_5]^+ + \text{HCN}$ (V)        | -801.73680 | .10453 | .11339 | .11528 | .05169  | -801.63227 | -801.62341 | -801.62152 | -801.68511 |

Table 5.3.1:  $[\text{UH}]^+ + \text{C}_6\text{H}_5\text{CN}$  B3LYP/SDD/6-311+g(d,p) Singlet Spin Structure Coordinates

| Structure                       | Coordinates |           |           |           |
|---------------------------------|-------------|-----------|-----------|-----------|
| $[\text{UH}]^+$                 | U           | -0.274048 | 0.000897  | -0.010869 |
|                                 | H           | -0.723542 | 1.193481  | 1.458793  |
| $\text{C}_6\text{H}_5\text{CN}$ | C           | -1.055947 | 0.491891  | 2.538959  |
|                                 | C           | 0.012079  | 0.288629  | 3.426226  |
|                                 | C           | 0.319458  | 1.263129  | 4.368751  |
|                                 | C           | -0.429975 | 2.438154  | 4.432931  |
|                                 | C           | -1.491221 | 2.640988  | 3.551891  |
|                                 | C           | -1.808457 | 1.673241  | 2.604426  |
|                                 | H           | 0.587893  | -0.626722 | 3.368545  |
|                                 | H           | 1.144135  | 1.106670  | 5.054186  |
|                                 | H           | -0.185961 | 3.194753  | 5.169870  |
|                                 | H           | -2.073506 | 3.553624  | 3.601569  |
|                                 | H           | -2.631243 | 1.823115  | 1.916425  |
|                                 | C           | -1.376868 | -0.508430 | 1.566180  |
|                                 | N           | -1.635176 | -1.316419 | 0.781279  |
| II                              | U           | -1.875737 | -0.054241 | 0.284638  |
|                                 | H           | -1.749140 | 0.992459  | -1.380597 |
|                                 | N           | 0.004096  | -0.621870 | 0.487262  |
|                                 | C           | 0.145578  | 0.528386  | 1.088992  |
|                                 | C           | 1.306058  | 1.159497  | 1.646991  |
|                                 | C           | 2.570481  | 0.533482  | 1.578588  |
|                                 | C           | 3.679705  | 1.160895  | 2.120954  |
|                                 | C           | 3.544991  | 2.411700  | 2.733656  |
|                                 | C           | 2.300314  | 3.041191  | 2.806394  |
|                                 | C           | 1.184158  | 2.420251  | 2.265559  |
|                                 | H           | 2.658000  | -0.434220 | 1.099472  |
|                                 | H           | 4.651405  | 0.684856  | 2.070241  |
|                                 | H           | 4.417057  | 2.898070  | 3.155346  |
|                                 | H           | 2.208764  | 4.010396  | 3.280913  |

|          |   |           |           |           |
|----------|---|-----------|-----------|-----------|
|          | H | 0.213657  | 2.901010  | 2.311409  |
| TSII→III | U | -1.683399 | -0.115523 | 0.157663  |
|          | H | -0.522149 | 1.500729  | -0.017333 |
|          | N | 0.148035  | -0.651452 | 0.288568  |
|          | C | 0.199054  | 0.563001  | 0.932059  |
|          | C | 1.353382  | 1.195793  | 1.536348  |
|          | C | 2.592081  | 0.530373  | 1.565171  |
|          | C | 3.683952  | 1.127407  | 2.182191  |
|          | C | 3.555338  | 2.389762  | 2.763644  |
|          | C | 2.329618  | 3.059522  | 2.734551  |
|          | C | 1.231474  | 2.465511  | 2.129504  |
|          | H | 2.680123  | -0.447339 | 1.107679  |
|          | H | 4.637049  | 0.612999  | 2.207158  |
|          | H | 4.411150  | 2.853885  | 3.239673  |
|          | H | 2.235873  | 4.040127  | 3.185154  |
|          | H | 0.278785  | 2.983302  | 2.103772  |
| III      | U | 0.571713  | -1.128519 | 1.708943  |
|          | H | -0.636895 | 1.538437  | 0.148099  |
|          | N | 0.189449  | -0.438934 | -0.015559 |
|          | C | 0.193025  | 0.885177  | 0.403967  |
|          | C | 1.307099  | 1.379698  | 1.147908  |
|          | C | 2.390578  | 0.464454  | 1.459428  |
|          | C | 3.410302  | 0.849600  | 2.381296  |
|          | C | 3.341069  | 2.064916  | 3.015503  |
|          | C | 2.303706  | 2.980704  | 2.684529  |
|          | C | 1.321470  | 2.659084  | 1.782640  |
|          | H | 2.647760  | -0.267142 | 0.663007  |
|          | H | 4.252137  | 0.188022  | 2.552304  |
|          | H | 4.102670  | 2.353149  | 3.729196  |
|          | H | 2.303357  | 3.962198  | 3.144316  |
|          | H | 0.554138  | 3.380105  | 1.523438  |
| TSIII→IV | U | -1.745840 | -0.758795 | 0.865263  |
|          | H | 0.483989  | 1.035523  | -0.600596 |
|          | N | -0.115213 | -0.996837 | -0.135460 |
|          | C | -0.244354 | 0.366842  | -0.154746 |
|          | C | -0.439734 | 0.977928  | 1.691972  |
|          | C | 0.500025  | 0.481966  | 2.614487  |
|          | C | 0.748546  | 1.190727  | 3.793211  |
|          | C | 0.084449  | 2.391860  | 4.035230  |
|          | C | -0.827880 | 2.902091  | 3.104161  |
|          | C | -1.082550 | 2.207687  | 1.925302  |
|          | H | 1.060269  | -0.424154 | 2.394937  |
|          | H | 1.481780  | 0.822129  | 4.501137  |
|          | H | 0.294296  | 2.949421  | 4.940228  |
|          | H | -1.319188 | 3.849807  | 3.291320  |
|          | H | -1.752560 | 2.628102  | 1.179057  |
| IV       | U | -1.532845 | 0.354223  | 0.109314  |
|          | H | 1.374388  | 0.409884  | -1.471300 |
|          | N | -0.131019 | -0.865212 | -0.694364 |
|          | C | 0.414402  | 0.262848  | -0.975105 |
|          | C | -0.741960 | 0.878834  | 2.160327  |
|          | C | 0.251847  | 0.555217  | 3.102190  |
|          | C | 0.341092  | 1.269809  | 4.290617  |
|          | C | -0.547587 | 2.319633  | 4.556410  |
|          | C | -1.535730 | 2.666138  | 3.638951  |
|          | C | -1.624519 | 1.938063  | 2.450916  |
|          | H | 0.951113  | -0.249111 | 2.903097  |
|          | H | 1.106052  | 1.019160  | 5.016369  |
|          | H | -0.463965 | 2.871403  | 5.485355  |
|          | H | -2.219254 | 3.481072  | 3.844090  |
|          | H | -2.423588 | 2.239191  | 1.751625  |

|                                                |   |           |           |           |
|------------------------------------------------|---|-----------|-----------|-----------|
| HCN                                            | C | 0.000000  | 0.000000  | -0.498334 |
|                                                | H | 0.000000  | 0.000000  | -1.564845 |
|                                                | N | -0.000000 | 0.000000  | 0.650693  |
| [UC <sub>6</sub> H <sub>5</sub> ] <sup>+</sup> | U | -1.554512 | 0.302139  | 0.191644  |
|                                                | C | -0.746247 | 0.700624  | 2.226813  |
|                                                | C | 0.219383  | 0.416980  | 3.213079  |
|                                                | C | 0.337385  | 1.241671  | 4.322684  |
|                                                | C | -0.498988 | 2.358857  | 4.474649  |
|                                                | C | -1.460413 | 2.662566  | 3.518692  |
|                                                | C | -1.568008 | 1.828731  | 2.401074  |
|                                                | H | 0.872158  | -0.443104 | 3.110202  |
|                                                | H | 1.080296  | 1.024529  | 5.081472  |
|                                                | H | -0.394804 | 2.990519  | 5.348993  |
|                                                | H | -2.112367 | 3.519184  | 3.639569  |
|                                                | H | -2.363821 | 2.085082  | 1.677137  |

Table 5.4: [UH]<sup>+</sup> + C<sub>6</sub>H<sub>5</sub>CN PBE1PBE/SDD/6-311+g(d,p) Singlet Spin Energies (Hartree)

| Structure                                                | E0         | E_ZPE  | E_tot  | H_corr | G_corr  | E0+E_ZPE   | E0+E_tot   | E0+H_corr  | E0+G_corr  |
|----------------------------------------------------------|------------|--------|--------|--------|---------|------------|------------|------------|------------|
| [UH] <sup>+</sup>                                        | -477.01929 | .00372 | .00608 | .00703 | -.01765 | -477.01557 | -477.01321 | -477.01226 | -477.03694 |
| C <sub>6</sub> H <sub>5</sub> CN                         | -324.18042 | .09961 | .10570 | .10664 | .06936  | -324.08081 | -324.07472 | -324.07378 | -324.11106 |
| [UH] <sup>+</sup> + C <sub>6</sub> H <sub>5</sub> CN (I) | -801.19970 | .10333 | .11178 | .11367 | .05171  | -801.09638 | -801.08793 | -801.08604 | -801.14800 |
| II                                                       | -801.33219 | .10488 | .11353 | .11448 | .06858  | -801.22732 | -801.21866 | -801.21772 | -801.26361 |
| TSII→III                                                 | -801.31370 | .10522 | .11299 | .11393 | .06969  | -801.20848 | -801.20071 | -801.19977 | -801.24401 |
| III                                                      | -801.35882 | .11007 | .11759 | .11854 | .07566  | -801.24875 | -801.24123 | -801.24028 | -801.28316 |
| TSIII→IV                                                 | -801.31774 | .10755 | .11537 | .11632 | .07193  | -801.21019 | -801.20237 | -801.20142 | -801.24582 |
| IV                                                       | -801.34073 | .10695 | .11601 | .11695 | .06900  | -801.23378 | -801.22473 | -801.22378 | -801.27173 |
| HCN                                                      | -93.33544  | .01649 | .01903 | .01997 | -.00287 | -93.31895  | -93.31641  | -93.31547  | -93.33831  |
| [UC <sub>6</sub> H <sub>5</sub> ] <sup>+</sup>           | -707.88915 | .08865 | .09497 | .09591 | .05517  | -707.80050 | -707.79419 | -707.79324 | -707.83399 |
| [UC <sub>6</sub> H <sub>5</sub> ] <sup>+</sup> + HCN (V) | -801.22459 | .10514 | .11399 | .11588 | .05230  | -801.11945 | -801.11060 | -801.10871 | -801.17229 |

Table 5.4.1: [UH]<sup>+</sup> + C<sub>6</sub>H<sub>5</sub>CN PBE1PBE/SDD/6-311+g(d,p) Singlet Spin Structure Coordinates

| Structure                        | Coordinates |           |           |           |
|----------------------------------|-------------|-----------|-----------|-----------|
| [UH] <sup>+</sup>                | U           | -0.274832 | 0.002976  | -0.008307 |
|                                  | H           | -0.722758 | 1.191402  | 1.456231  |
| C <sub>6</sub> H <sub>5</sub> CN | C           | -1.054586 | 0.494902  | 2.542305  |
|                                  | C           | 0.009974  | 0.290792  | 3.425682  |
|                                  | C           | 0.316578  | 1.262988  | 4.365902  |
|                                  | C           | -0.430932 | 2.434561  | 4.429598  |
|                                  | C           | -1.489871 | 2.637178  | 3.550649  |
|                                  | C           | -1.806101 | 1.672161  | 2.605991  |
|                                  | H           | 0.585621  | -0.625896 | 3.366956  |
|                                  | H           | 1.142065  | 1.105662  | 5.051529  |
|                                  | H           | -0.187126 | 3.192135  | 5.166963  |
|                                  | H           | -2.072462 | 3.550623  | 3.600568  |
|                                  | H           | -2.629208 | 1.819719  | 1.916153  |
|                                  | C           | -1.374792 | -0.502883 | 1.571847  |
|                                  | N           | -1.633949 | -1.309317 | 0.787096  |
| II                               | U           | -1.835443 | -0.051177 | 0.303710  |
|                                  | H           | -1.699763 | 1.008512  | -1.338054 |
|                                  | N           | 0.021724  | -0.622712 | 0.483895  |
|                                  | C           | 0.142641  | 0.533140  | 1.087980  |

|          |   |           |           |           |
|----------|---|-----------|-----------|-----------|
|          | C | 1.301664  | 1.161468  | 1.644202  |
|          | C | 2.559570  | 0.534407  | 1.575680  |
|          | C | 3.666974  | 1.158994  | 2.116883  |
|          | C | 3.532828  | 2.406892  | 2.727123  |
|          | C | 2.292541  | 3.037094  | 2.799297  |
|          | C | 1.178737  | 2.418306  | 2.259566  |
|          | H | 2.643300  | -0.434715 | 1.095668  |
|          | H | 4.639228  | 0.681752  | 2.066935  |
|          | H | 4.406145  | 2.892960  | 3.149452  |
|          | H | 2.202341  | 4.007582  | 3.273728  |
|          | H | 0.206899  | 2.899360  | 2.303754  |
| TSII→III | U | -1.643221 | -0.096402 | 0.161753  |
|          | H | -0.514095 | 1.502823  | -0.047073 |
|          | N | 0.157858  | -0.653153 | 0.307907  |
|          | C | 0.196857  | 0.567066  | 0.945129  |
|          | C | 1.351223  | 1.195185  | 1.544978  |
|          | C | 2.585348  | 0.531525  | 1.565975  |
|          | C | 3.677206  | 1.128448  | 2.175439  |
|          | C | 3.549211  | 2.387179  | 2.756262  |
|          | C | 2.326030  | 3.054208  | 2.734928  |
|          | C | 1.228263  | 2.460132  | 2.136848  |
|          | H | 2.669337  | -0.447364 | 1.106885  |
|          | H | 4.632221  | 0.615321  | 2.195644  |
|          | H | 4.407760  | 2.852699  | 3.228478  |
|          | H | 2.233688  | 4.035203  | 3.187328  |
|          | H | 0.272681  | 2.975225  | 2.115321  |
| III      | U | 0.583925  | -1.069476 | 1.730702  |
|          | H | -0.631103 | 1.506554  | 0.137002  |
|          | N | 0.231049  | -0.460783 | -0.006586 |
|          | C | 0.207763  | 0.867906  | 0.404831  |
|          | C | 1.310410  | 1.377312  | 1.143204  |
|          | C | 2.388540  | 0.468693  | 1.466009  |
|          | C | 3.405406  | 0.855881  | 2.385862  |
|          | C | 3.330086  | 2.068355  | 3.014330  |
|          | C | 2.292556  | 2.978264  | 2.677748  |
|          | C | 1.318447  | 2.655789  | 1.774225  |
|          | H | 2.636233  | -0.271991 | 0.669729  |
|          | H | 4.247105  | 0.193856  | 2.562087  |
|          | H | 4.089426  | 2.361521  | 3.729996  |
|          | H | 2.288316  | 3.962044  | 3.135247  |
|          | H | 0.553418  | 3.377027  | 1.504632  |
| TSIII→IV | U | -1.561934 | -0.855204 | 0.965410  |
|          | H | 0.338090  | 1.096212  | -0.674259 |
|          | N | 0.015128  | -0.968696 | -0.102384 |
|          | C | -0.291991 | 0.363971  | -0.176915 |
|          | C | -0.458944 | 1.004845  | 1.684315  |
|          | C | 0.453168  | 0.474961  | 2.609548  |
|          | C | 0.710070  | 1.162765  | 3.795442  |
|          | C | 0.079822  | 2.378111  | 4.035058  |
|          | C | -0.804227 | 2.918049  | 3.099165  |
|          | C | -1.073443 | 2.240437  | 1.916902  |
|          | H | 1.011617  | -0.434693 | 2.374679  |
|          | H | 1.429938  | 0.770971  | 4.506245  |
|          | H | 0.295410  | 2.925023  | 4.946384  |
|          | H | -1.273836 | 3.877167  | 3.290560  |
|          | H | -1.742832 | 2.670379  | 1.175354  |
| IV       | U | -1.572313 | 0.198915  | 0.211243  |
|          | H | 1.214139  | 0.768110  | -1.395625 |
|          | N | -0.099184 | -0.760636 | -0.741603 |
|          | C | 0.293409  | 0.455899  | -0.900287 |
|          | C | -0.736898 | 0.726739  | 2.218306  |
|          | C | 0.222737  | 0.434649  | 3.198862  |

|                                                |   |           |           |           |
|------------------------------------------------|---|-----------|-----------|-----------|
|                                                | C | 0.327676  | 1.238388  | 4.322254  |
|                                                | C | -0.508238 | 2.347765  | 4.483423  |
|                                                | C | -1.459641 | 2.666328  | 3.525416  |
|                                                | C | -1.563784 | 1.845183  | 2.404084  |
|                                                | H | 0.884927  | -0.416838 | 3.078965  |
|                                                | H | 1.068169  | 1.012260  | 5.082255  |
|                                                | H | -0.409872 | 2.970064  | 5.366464  |
|                                                | H | -2.104109 | 3.529471  | 3.648397  |
|                                                | H | -2.338592 | 2.134854  | 1.666338  |
| HCN                                            | C | 0.000000  | 0.000000  | -0.497856 |
|                                                | H | 0.000000  | 0.000000  | -1.566083 |
|                                                | N | -0.000000 | -0.000000 | 0.650460  |
| [UC <sub>6</sub> H <sub>5</sub> ] <sup>+</sup> | U | -1.493511 | 0.334631  | 0.195316  |
|                                                | C | -0.762557 | 0.688760  | 2.235264  |
|                                                | C | 0.205872  | 0.412357  | 3.216288  |
|                                                | C | 0.335323  | 1.242371  | 4.315082  |
|                                                | C | -0.493957 | 2.360883  | 4.463929  |
|                                                | C | -1.458908 | 2.659582  | 3.516314  |
|                                                | C | -1.577791 | 1.821726  | 2.406455  |
|                                                | H | 0.854499  | -0.451825 | 3.112492  |
|                                                | H | 1.084407  | 1.028518  | 5.070200  |
|                                                | H | -0.381873 | 2.999367  | 5.333719  |
|                                                | H | -2.110946 | 3.517123  | 3.638867  |
|                                                | H | -2.390497 | 2.074285  | 1.702080  |

Table 5.5: [UH]<sup>+</sup> + C<sub>6</sub>H<sub>5</sub>CN B3LYP/SDD/6-311+g(d,p) Triplet Spin Energies (Hartree)

| Structure                                                | E0         | E_ZPE  | E_tot  | H_corr | G_corr  | E0+E_ZPE   | E0+E_tot   | E0+H_corr  | E0+G_corr  |
|----------------------------------------------------------|------------|--------|--------|--------|---------|------------|------------|------------|------------|
| [UH] <sup>+</sup>                                        | -477.14828 | .00361 | .00597 | .00691 | -.01880 | -477.14467 | -477.14231 | -477.14136 | -477.16708 |
| C <sub>6</sub> H <sub>5</sub> CN                         | -324.57776 | .09886 | .10496 | .10590 | .06860  | -324.47890 | -324.47280 | -324.47186 | -324.50916 |
| [UH] <sup>+</sup> + C <sub>6</sub> H <sub>5</sub> CN (I) | -801.72604 | .10247 | .11093 | .11282 | .04980  | -801.62357 | -801.61511 | -801.61322 | -801.67623 |
| II                                                       | -801.87043 | .10352 | .11245 | .11339 | .06565  | -801.76691 | -801.75798 | -801.75704 | -801.80477 |
| TSII→III                                                 | -801.84724 | .10379 | .11181 | .11275 | .06683  | -801.74345 | -801.73544 | -801.73449 | -801.78041 |
| III                                                      | -801.90450 | .11200 | .11989 | .12084 | .07475  | -801.79250 | -801.78461 | -801.78366 | -801.82975 |
| TSIII→IV                                                 | -801.84766 | .10627 | .11448 | .11543 | .06904  | -801.74138 | -801.73317 | -801.73223 | -801.77861 |
| IV                                                       | -801.87471 | .10560 | .11496 | .11590 | .06606  | -801.76911 | -801.75975 | -801.75881 | -801.80864 |
| HCN                                                      | -93.45449  | .01636 | .01890 | .01985 | -.00300 | -93.43813  | -93.43559  | -93.43465  | -93.45749  |
| [UC <sub>6</sub> H <sub>5</sub> ] <sup>+</sup>           | -708.34263 | .08844 | .09472 | .09566 | .05397  | -708.25419 | -708.24791 | -708.24697 | -708.28866 |
| [UC <sub>6</sub> H <sub>5</sub> ] <sup>+</sup> + HCN (V) | -801.79712 | .10480 | .11362 | .11551 | .05097  | -801.69232 | -801.68350 | -801.68161 | -801.74615 |

Table 5.5.1: [UH]<sup>+</sup> + C<sub>6</sub>H<sub>5</sub>CN B3LYP/SDD/6-311+g(d,p) Triplet Spin Structure Coordinates

| Structure                        | Coordinates |           |           |           |
|----------------------------------|-------------|-----------|-----------|-----------|
| [UH] <sup>+</sup>                | U           | -0.275143 | 0.003800  | -0.007291 |
|                                  | H           | -0.722447 | 1.190578  | 1.455215  |
| C <sub>6</sub> H <sub>5</sub> CN | C           | -1.055947 | 0.491891  | 2.538959  |
|                                  | C           | 0.012079  | 0.288629  | 3.426226  |
|                                  | C           | 0.319458  | 1.263129  | 4.368751  |
|                                  | C           | -0.429975 | 2.438154  | 4.432931  |
|                                  | C           | -1.491221 | 2.640988  | 3.551891  |
|                                  | C           | -1.808457 | 1.673241  | 2.604426  |
|                                  | H           | 0.587893  | -0.626722 | 3.368545  |
|                                  | H           | 1.144135  | 1.106670  | 5.054186  |

|          |   |           |           |           |
|----------|---|-----------|-----------|-----------|
|          | H | -0.185961 | 3.194753  | 5.169870  |
|          | H | -2.073506 | 3.553624  | 3.601569  |
|          | H | -2.631243 | 1.823115  | 1.916425  |
|          | C | -1.376868 | -0.508430 | 1.566180  |
|          | N | -1.635176 | -1.316419 | 0.781279  |
| II       | U | -1.957922 | -0.034743 | 0.271601  |
|          | H | -1.863374 | 1.034622  | -1.401667 |
|          | N | -0.003607 | -0.619505 | 0.485170  |
|          | C | 0.186323  | 0.492273  | 1.078664  |
|          | C | 1.332643  | 1.145064  | 1.645742  |
|          | C | 2.601080  | 0.526617  | 1.589936  |
|          | C | 3.701066  | 1.165676  | 2.138183  |
|          | C | 3.552139  | 2.418507  | 2.742650  |
|          | C | 2.302471  | 3.038906  | 2.801573  |
|          | C | 1.194889  | 2.406783  | 2.255181  |
|          | H | 2.699869  | -0.442881 | 1.116715  |
|          | H | 4.676441  | 0.696166  | 2.097654  |
|          | H | 4.417100  | 2.913702  | 3.168596  |
|          | H | 2.199640  | 4.010073  | 3.269651  |
|          | H | 0.220629  | 2.880601  | 2.290170  |
| TSII→III | U | -1.816812 | -0.089749 | 0.146724  |
|          | H | -0.679466 | 1.593235  | 0.196032  |
|          | N | 0.153210  | -0.601178 | 0.201709  |
|          | C | 0.280153  | 0.496025  | 0.885199  |
|          | C | 1.397663  | 1.168148  | 1.505939  |
|          | C | 2.640434  | 0.510030  | 1.578976  |
|          | C | 3.709266  | 1.124152  | 2.217548  |
|          | C | 3.554573  | 2.393850  | 2.777517  |
|          | C | 2.325797  | 3.054517  | 2.703667  |
|          | C | 1.249247  | 2.444556  | 2.076386  |
|          | H | 2.748139  | -0.472874 | 1.136711  |
|          | H | 4.665669  | 0.618506  | 2.274851  |
|          | H | 4.393542  | 2.871377  | 3.269963  |
|          | H | 2.213602  | 4.041692  | 3.135186  |
|          | H | 0.295350  | 2.955809  | 2.009394  |
| III      | U | -0.514472 | -1.964913 | -0.766253 |
|          | H | -0.730371 | 1.540646  | 0.992564  |
|          | N | -0.073277 | -0.278568 | 0.310311  |
|          | C | 0.114583  | 0.845107  | 0.921754  |
|          | C | 1.336724  | 1.308936  | 1.541828  |
|          | C | 2.519891  | 0.543430  | 1.552156  |
|          | C | 3.658723  | 1.036019  | 2.164848  |
|          | C | 3.635463  | 2.296951  | 2.774799  |
|          | C | 2.471522  | 3.065746  | 2.772277  |
|          | C | 1.326440  | 2.575529  | 2.159207  |
|          | H | 2.528624  | -0.430778 | 1.078578  |
|          | H | 4.569296  | 0.449294  | 2.174649  |
|          | H | 4.530630  | 2.677597  | 3.252882  |
|          | H | 2.461047  | 4.039464  | 3.246210  |
|          | H | 0.416753  | 3.166491  | 2.153207  |
| TSIII→IV | U | -1.900067 | -0.665159 | 0.849358  |
|          | H | 0.596587  | 1.014096  | -0.549810 |
|          | N | -0.225786 | -0.963878 | -0.269897 |
|          | C | -0.159218 | 0.335554  | -0.166056 |
|          | C | -0.432525 | 0.947157  | 1.713085  |
|          | C | 0.530339  | 0.484888  | 2.628153  |
|          | C | 0.782067  | 1.213914  | 3.792426  |
|          | C | 0.092482  | 2.401919  | 4.034756  |
|          | C | -0.847936 | 2.879043  | 3.116146  |
|          | C | -1.099535 | 2.165182  | 1.946900  |
|          | H | 1.094221  | -0.421086 | 2.421085  |
|          | H | 1.530370  | 0.867479  | 4.495930  |

|                                                |   |           |           |           |
|------------------------------------------------|---|-----------|-----------|-----------|
|                                                | H | 0.303801  | 2.973025  | 4.930954  |
|                                                | H | -1.357935 | 3.817533  | 3.300014  |
|                                                | H | -1.780830 | 2.574631  | 1.202459  |
| IV                                             | U | -1.594873 | 0.112349  | 0.241092  |
|                                                | H | 1.217858  | 0.685486  | -1.567088 |
|                                                | N | -0.052303 | -0.846119 | -0.836250 |
|                                                | C | 0.332299  | 0.334172  | -1.033049 |
|                                                | C | -0.724523 | 0.743662  | 2.249957  |
|                                                | C | 0.243083  | 0.484165  | 3.238326  |
|                                                | C | 0.333319  | 1.298203  | 4.360420  |
|                                                | C | -0.528782 | 2.392141  | 4.517804  |
|                                                | C | -1.488802 | 2.682022  | 3.554679  |
|                                                | C | -1.574598 | 1.851764  | 2.433377  |
|                                                | H | 0.924180  | -0.352521 | 3.127858  |
|                                                | H | 1.077920  | 1.091007  | 5.120395  |
|                                                | H | -0.444467 | 3.021041  | 5.396238  |
|                                                | H | -2.151350 | 3.531101  | 3.671169  |
|                                                | H | -2.350532 | 2.122681  | 1.693563  |
| HCN                                            | C | 0.000000  | 0.000000  | -0.498334 |
|                                                | H | 0.000000  | 0.000000  | -1.564845 |
|                                                | N | -0.000000 | 0.000000  | 0.650693  |
| [UC <sub>6</sub> H <sub>5</sub> ] <sup>+</sup> | U | -1.599832 | 0.160642  | 0.200300  |
|                                                | C | -0.726892 | 0.739230  | 2.203111  |
|                                                | C | 0.228239  | 0.439889  | 3.195314  |
|                                                | C | 0.332273  | 1.239555  | 4.325011  |
|                                                | C | -0.508815 | 2.350024  | 4.491386  |
|                                                | C | -1.460661 | 2.670744  | 3.530437  |
|                                                | C | -1.556742 | 1.858795  | 2.396433  |
|                                                | H | 0.886492  | -0.415021 | 3.083011  |
|                                                | H | 1.067602  | 1.007795  | 5.086866  |
|                                                | H | -0.415569 | 2.964619  | 5.379105  |
|                                                | H | -2.110862 | 3.527567  | 3.658923  |
|                                                | H | -2.325173 | 2.143939  | 1.656110  |

Table 5.6: [UH]<sup>+</sup> + C<sub>6</sub>H<sub>5</sub>CN PBE1PBE/SDD/6-311+g(d,p) Triplet Spin Energies (Hartree)

| Structure                                                | E0         | E_ZPE  | E_tot  | H_corr | G_corr  | E0+E_ZPE   | E0+E_tot   | E0+H_corr  | E0+G_corr  |
|----------------------------------------------------------|------------|--------|--------|--------|---------|------------|------------|------------|------------|
| [UH] <sup>+</sup>                                        | -477.06589 | .00353 | .00589 | .00684 | -.01891 | -477.06236 | -477.06000 | -477.05905 | -477.08480 |
| C <sub>6</sub> H <sub>5</sub> CN                         | -324.18042 | .09961 | .10570 | .10664 | .06936  | -324.08081 | -324.07472 | -324.07378 | -324.11106 |
| [UH] <sup>+</sup> + C <sub>6</sub> H <sub>5</sub> CN (I) | -801.24631 | .10314 | .11159 | .11348 | .05045  | -801.14317 | -801.13472 | -801.13283 | -801.19586 |
| II                                                       | -801.37840 | .10454 | .11333 | .11428 | .06697  | -801.27386 | -801.26507 | -801.26412 | -801.31143 |
| TSII→III                                                 | -801.36183 | .10463 | .11262 | .11357 | .06770  | -801.25720 | -801.24921 | -801.24826 | -801.29413 |
| III                                                      | -801.38817 | .11156 | .11972 | .12066 | .07391  | -801.27662 | -801.26846 | -801.26751 | -801.31427 |
| TSIII→IV                                                 | -801.36326 | .10689 | .11515 | .11610 | .06932  | -801.25637 | -801.24811 | -801.24717 | -801.29395 |
| IV                                                       | -801.38462 | .10661 | .11584 | .11679 | .06736  | -801.27801 | -801.26878 | -801.26783 | -801.31726 |
| HCN                                                      | -93.33544  | .01649 | .01903 | .01997 | -.00287 | -93.31895  | -93.31641  | -93.31547  | -93.33831  |
| [UC <sub>6</sub> H <sub>5</sub> ] <sup>+</sup>           | -707.95895 | .08894 | .09517 | .09612 | .05462  | -707.87002 | -707.86378 | -707.86284 | -707.90434 |
| [UC <sub>6</sub> H <sub>5</sub> ] <sup>+</sup> + HCN (V) | -801.29439 | .10543 | .11420 | .11609 | .05175  | -801.18896 | -801.18019 | -801.17830 | -801.24264 |

Table 5.6.1: [UH]<sup>+</sup> + C<sub>6</sub>H<sub>5</sub>CN PBE1PBE/SDD/6-311+g(d,p) Triplet Spin Structure Coordinates

| Structure | Coordinates |
|-----------|-------------|
|-----------|-------------|

|                                  |   |           |           |           |
|----------------------------------|---|-----------|-----------|-----------|
| [UH] <sup>+</sup>                | U | -0.280565 | 0.018185  | 0.010435  |
|                                  | H | -0.735512 | 1.225240  | 1.497931  |
| C <sub>6</sub> H <sub>5</sub> CN | C | -1.054586 | 0.494902  | 2.542305  |
|                                  | C | 0.009974  | 0.290792  | 3.425682  |
|                                  | C | 0.316578  | 1.262988  | 4.365902  |
|                                  | C | -0.430932 | 2.434561  | 4.429598  |
|                                  | C | -1.489871 | 2.637178  | 3.550649  |
|                                  | C | -1.806101 | 1.672161  | 2.605991  |
|                                  | H | 0.585621  | -0.625896 | 3.366956  |
|                                  | H | 1.142065  | 1.105662  | 5.051529  |
|                                  | H | -0.187126 | 3.192135  | 5.166963  |
|                                  | H | -2.072462 | 3.550623  | 3.600568  |
|                                  | H | -2.629208 | 1.819719  | 1.916153  |
|                                  | C | -1.374792 | -0.502883 | 1.571847  |
|                                  | N | -1.633949 | -1.309317 | 0.787096  |
| II                               | U | -1.899106 | -0.030137 | 0.295560  |
|                                  | H | -1.810442 | 0.994433  | -1.385820 |
|                                  | N | 0.018191  | -0.607537 | 0.480773  |
|                                  | C | 0.170252  | 0.519187  | 1.081513  |
|                                  | C | 1.321355  | 1.157248  | 1.644718  |
|                                  | C | 2.581029  | 0.532811  | 1.582346  |
|                                  | C | 3.683608  | 1.161165  | 2.128950  |
|                                  | C | 3.542354  | 2.409086  | 2.737508  |
|                                  | C | 2.300067  | 3.035876  | 2.802890  |
|                                  | C | 1.190680  | 2.413441  | 2.257900  |
|                                  | H | 2.669982  | -0.436228 | 1.103102  |
|                                  | H | 4.657549  | 0.686824  | 2.084183  |
|                                  | H | 4.412104  | 2.898072  | 3.163824  |
|                                  | H | 2.204759  | 4.006480  | 3.276029  |
|                                  | H | 0.217004  | 2.891141  | 2.296343  |
| TSII→III                         | U | -1.778660 | -0.061164 | 0.180258  |
|                                  | H | -0.673500 | 1.607529  | 0.145967  |
|                                  | N | 0.159265  | -0.606547 | 0.224467  |
|                                  | C | 0.276683  | 0.497755  | 0.900646  |
|                                  | C | 1.395807  | 1.165593  | 1.514679  |
|                                  | C | 2.632198  | 0.506358  | 1.585650  |
|                                  | C | 3.701400  | 1.120220  | 2.216544  |
|                                  | C | 3.549485  | 2.389824  | 2.768519  |
|                                  | C | 2.325299  | 3.051419  | 2.695530  |
|                                  | C | 1.248703  | 2.440874  | 2.076195  |
|                                  | H | 2.733977  | -0.480195 | 1.146736  |
|                                  | H | 4.658233  | 0.613368  | 2.274600  |
|                                  | H | 4.391496  | 2.869022  | 3.256577  |
|                                  | H | 2.216578  | 4.042026  | 3.122525  |
|                                  | H | 0.293404  | 2.952015  | 2.006912  |
| III                              | U | -0.488273 | -1.970244 | -0.689831 |
|                                  | H | -0.726517 | 1.551110  | 0.975169  |
|                                  | N | -0.055797 | -0.262653 | 0.293656  |
|                                  | C | 0.121991  | 0.858752  | 0.909710  |
|                                  | C | 1.337144  | 1.314752  | 1.536247  |
|                                  | C | 2.514863  | 0.549103  | 1.540589  |
|                                  | C | 3.650912  | 1.034689  | 2.156527  |
|                                  | C | 3.627175  | 2.287358  | 2.774921  |
|                                  | C | 2.467138  | 3.055739  | 2.777675  |
|                                  | C | 1.325229  | 2.572648  | 2.160786  |
|                                  | H | 2.520904  | -0.421916 | 1.057081  |
|                                  | H | 4.562196  | 0.447187  | 2.162190  |
|                                  | H | 4.522940  | 2.663891  | 3.257566  |
|                                  | H | 2.457391  | 4.026558  | 3.259785  |
|                                  | H | 0.414280  | 3.163978  | 2.156948  |

|                                                |   |           |           |           |
|------------------------------------------------|---|-----------|-----------|-----------|
| TSIII→IV                                       | U | -1.779672 | -0.683571 | 0.869879  |
|                                                | H | 0.524814  | 1.039983  | -0.630374 |
|                                                | N | -0.135223 | -0.970423 | -0.212393 |
|                                                | C | -0.201417 | 0.345599  | -0.214157 |
|                                                | C | -0.448186 | 0.974962  | 1.711969  |
|                                                | C | 0.512828  | 0.491554  | 2.610409  |
|                                                | C | 0.770915  | 1.197265  | 3.784209  |
|                                                | C | 0.088758  | 2.380984  | 4.045619  |
|                                                | C | -0.849115 | 2.876924  | 3.139748  |
|                                                | C | -1.111479 | 2.185117  | 1.963222  |
|                                                | H | 1.079081  | -0.409661 | 2.376558  |
|                                                | H | 1.524143  | 0.839000  | 4.478119  |
|                                                | H | 0.306293  | 2.938147  | 4.950343  |
|                                                | H | -1.353951 | 3.815776  | 3.341792  |
|                                                | H | -1.801754 | 2.602642  | 1.230561  |
| IV                                             | U | -1.452819 | -0.319587 | 0.476012  |
|                                                | H | 0.390437  | 1.454136  | -1.680242 |
|                                                | N | 0.141378  | -0.475328 | -0.854872 |
|                                                | C | -0.130138 | 0.743932  | -1.032990 |
|                                                | C | -0.601992 | 0.435637  | 2.422035  |
|                                                | C | 0.178012  | 0.249219  | 3.572925  |
|                                                | C | 0.233013  | 1.237465  | 4.542415  |
|                                                | C | -0.475804 | 2.433010  | 4.383484  |
|                                                | C | -1.244924 | 2.654845  | 3.251944  |
|                                                | C | -1.295515 | 1.647343  | 2.289126  |
|                                                | H | 0.741091  | -0.668627 | 3.710765  |
|                                                | H | 0.832391  | 1.087308  | 5.434290  |
|                                                | H | -0.419751 | 3.197012  | 5.151414  |
|                                                | H | -1.784712 | 3.585746  | 3.119428  |
|                                                | H | -1.892240 | 1.889041  | 1.382756  |
| HCN                                            | C | 0.000000  | 0.000000  | -0.497856 |
|                                                | H | 0.000000  | 0.000000  | -1.566083 |
|                                                | N | -0.000000 | -0.000000 | 0.650460  |
| [UC <sub>6</sub> H <sub>5</sub> ] <sup>+</sup> | U | -1.643435 | 0.264475  | 0.230490  |
|                                                | C | -0.711583 | 0.716108  | 2.210422  |
|                                                | C | 0.237063  | 0.431794  | 3.206567  |
|                                                | C | 0.331768  | 1.240582  | 4.325633  |
|                                                | C | -0.510965 | 2.347792  | 4.478836  |
|                                                | C | -1.457088 | 2.656676  | 3.515178  |
|                                                | C | -1.542798 | 1.832008  | 2.393092  |
|                                                | H | 0.898705  | -0.422517 | 3.102595  |
|                                                | H | 1.065165  | 1.018001  | 5.093590  |
|                                                | H | -0.422974 | 2.971185  | 5.362173  |
|                                                | H | -2.112075 | 3.512725  | 3.632063  |
|                                                | H | -2.321721 | 2.118950  | 1.655367  |

Table 5.7.1: [UH]<sup>+</sup> + C<sub>6</sub>H<sub>5</sub>CN B3LYP/SDD/6-311+g(d,p) Quintet Spin Relative Energies (kJ/mol)

| Structure     |     | E0+E_ZPE |          | E0+H_cor | E0+G_cor |
|---------------|-----|----------|----------|----------|----------|
|               |     |          |          | r        | r        |
| Reactants (I) |     | 0        | 0        | 0        | 0        |
| TSII→III      | II  | -228.492 | -226.877 | -229.358 | -191.52  |
|               | III | -187.6   | -188.44  | -190.921 | -146.855 |
|               | III | -332.919 | -333.74  | -336.222 | -293.339 |

|              |          |          |          |          |
|--------------|----------|----------|----------|----------|
| TSIII → IV   | -172.112 | -172.564 | -175.045 | -131.561 |
| IV           | -230.438 | -227.681 | -230.162 | -196.519 |
| Products (V) | -119.757 | -118.817 | -118.82  | -122.716 |

Table 5.7.2: [UH]<sup>+</sup> + C<sub>6</sub>H<sub>5</sub>CN PBE1PBE/SDD/6-311+g(d,p) Quintet Spin Relative Energies (kJ/mol)

| Structure     | EO+E_ZPE | EO+E_tot | EO+H_cor<br>r | EO+G_cor<br>r |
|---------------|----------|----------|---------------|---------------|
| Reactants (I) | 0        | 0        | 0             | 0             |
| II            | -185.686 | -184.2   | -186.678      | -148.349      |
| TSII → III    | -161.72  | -162.776 | -165.254      | -120.739      |
| III           | -289.173 | -290     | -292.478      | -249.601      |
| TSIII → IV    | -151.119 | -151.733 | -154.211      | -109.604      |
| IV            | -192.496 | -190.007 | -192.486      | -157.509      |
| Products (V)  | -58.9136 | -58.1076 | -58.1076      | -61.4183      |

Table 5.7.3: [UH]<sup>+</sup> + C<sub>6</sub>H<sub>5</sub>CN B3LYP/SDD/6-311+g(d,p) Singlet Spin Relative Energies (kJ/mol)

| Structure     | EO+E_ZPE | EO+E_tot | EO+H_cor<br>r | EO+G_cor<br>r |
|---------------|----------|----------|---------------|---------------|
| Reactants (I) | 165.1177 | 165.1203 | 165.1177      | 169.1373      |
| II            | -121.595 | -121.101 | -123.58       | -77.2868      |
| TSII → III    | -52.6964 | -54.3452 | -56.8263      | -6.61364      |
| III           | -147.117 | -149.346 | -151.827      | -98.2305      |
| TSIII → IV    | -54.0617 | -55.4952 | -57.9763      | -8.3806       |
| IV            | -134.728 | -132.827 | -135.308      | -96.0408      |
| Products (V)  | 114.2618 | 115.3172 | 115.3172      | 115.1124      |

Table 5.7.4: [UH]<sup>+</sup> + C<sub>6</sub>H<sub>5</sub>CN PBE1PBE/SDD/6-311+g(d,p) Singlet Spin Relative Energies (kJ/mol)

| Structure     | EO+E_ZPE | EO+E_tot | EO+H_cor<br>r | EO+G_cor<br>r |
|---------------|----------|----------|---------------|---------------|
| Reactants (I) | 267.1394 | 267.1394 | 267.1394      | 271.1564      |
| II            | -76.6489 | -76.108  | -78.5865      | -32.3882      |
| TSII → III    | -27.2002 | -28.975  | -31.4535      | 19.06901      |
| III           | -132.924 | -135.358 | -137.834      | -83.722       |
| TSIII → IV    | -31.6898 | -33.3281 | -35.8066      | 14.32998      |
| IV            | -93.6253 | -92.029  | -94.5049      | -53.6967      |
| Products (V)  | 206.556  | 207.6088 | 207.6088      | 207.3725      |

Table 5.7.5: [UH]<sup>+</sup> + C<sub>6</sub>H<sub>5</sub>CN B3LYP/SDD/6-311+g(d,p) Triplet Spin Relative Energies (kJ/mol)

| Structure     | EO+E_ZPE | EO+E_tot | EO+H_cor<br>r | EO+G_cor<br>r |
|---------------|----------|----------|---------------|---------------|
| Reactants (I) | 137.1036 | 137.1062 | 137.1036      | 138.4216      |
| II            | -239.217 | -237.996 | -240.477      | -199.063      |
| TSII → III    | -177.641 | -178.807 | -181.288      | -135.098      |

|              |          |          |          |          |
|--------------|----------|----------|----------|----------|
| III          | -306.412 | -307.903 | -310.384 | -264.645 |
| TSIII→IV     | -172.209 | -172.863 | -175.341 | -130.38  |
| IV           | -245.009 | -242.646 | -245.127 | -209.218 |
| Products (V) | -43.389  | -42.4543 | -42.457  | -45.1534 |

Table 5.7.6:  $[\text{UH}]^+ + \text{C}_6\text{H}_5\text{CN}$  PBE1PBE/SDD/6-311+g(d,p) Triplet Spin Relative Energies (kJ/mol)

| Structure     | E0+E_ZPE | E0+E_tot | E0+H_cor<br>r | E0+G_cor<br>r |
|---------------|----------|----------|---------------|---------------|
| Reactants (I) | 144.2844 | 144.2896 | 144.2896      | 145.5         |
| II            | -198.85  | -197.95  | -200.428      | -157.947      |
| TSII→III      | -155.109 | -156.304 | -158.78       | -112.516      |
| III           | -206.086 | -206.847 | -209.326      | -165.383      |
| TSIII→IV      | -152.925 | -153.426 | -155.905      | -112.041      |
| IV            | -209.743 | -207.685 | -210.163      | -173.238      |
| Products (V)  | 24.04958 | 24.89237 | 24.89237      | 22.66857      |

Figure 7:  $[\text{UH}]^+ + \text{C}_6\text{H}_5\text{CN}$  B3LYP/SDD/6-311+g(d,p) Relative Enthalpy (kJ/mol)

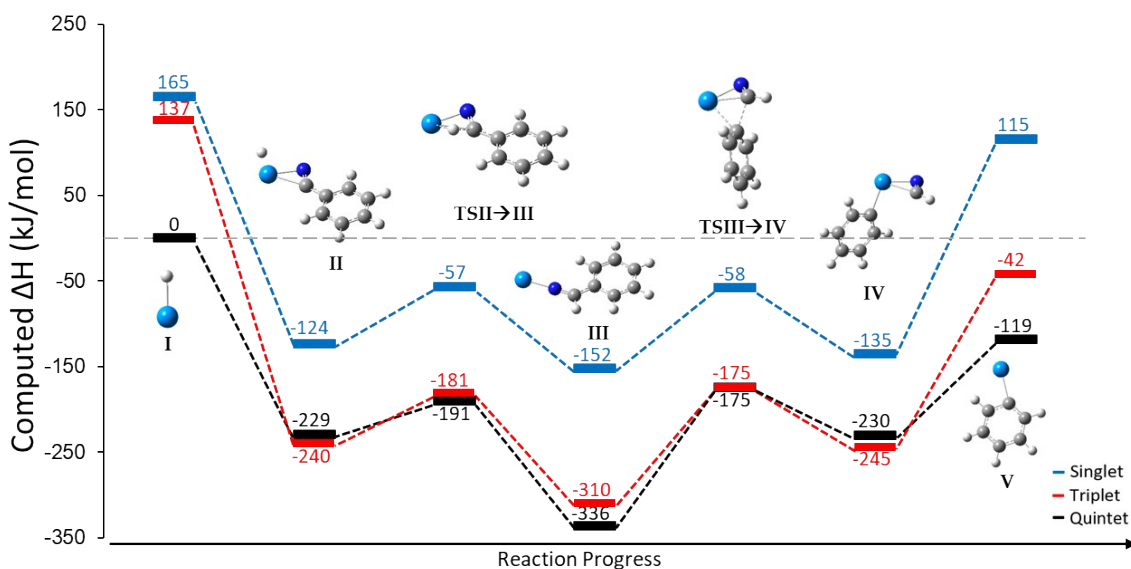

Figure 7.1:  $[\text{UH}]^+ + \text{C}_6\text{H}_5\text{CN}$  PBE1PBE/SDD/6-311+g(d,p) Relative Enthalpy (kJ/mol)

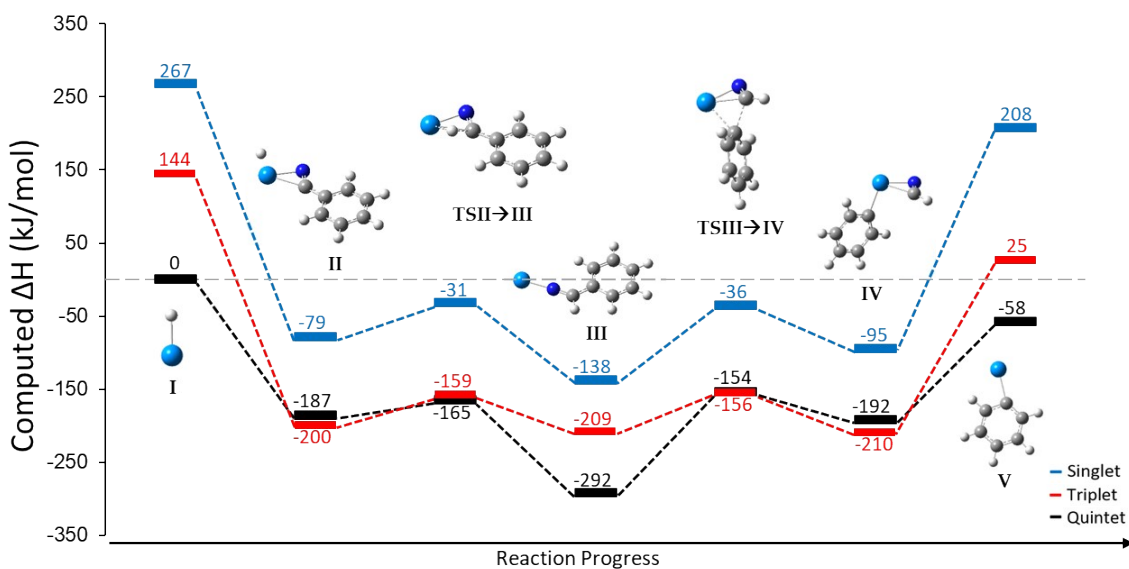

Table 6.1:  $[UH]^+ + C_2H_3CN$  B3LYP/SDD/6-311+g(d,p) Quintet Spin Energies (Hartree)

| Structure               | E0         | E_ZPE  | E_tot  | H_corr | G_corr  | E0+E_ZPE   | E0+E_tot   | E0+H_corr  | E0+G_corr  |
|-------------------------|------------|--------|--------|--------|---------|------------|------------|------------|------------|
| $[UH]^+$                | -477.20060 | .00371 | .00608 | .00702 | -.01919 | -477.19689 | -477.19453 | -477.19358 | -477.21980 |
| $C_2H_3CN$              | -170.88287 | .05058 | .05473 | .05567 | .02471  | -170.83229 | -170.82814 | -170.82720 | -170.85817 |
| $[UH]^+ + C_2H_3CN$ (I) | -648.08348 | .05429 | .06080 | .06269 | .00551  | -648.02919 | -648.02267 | -648.02078 | -648.07796 |
| II                      | -648.16677 | .05538 | .06230 | .06324 | .02034  | -648.11139 | -648.10447 | -648.10353 | -648.14643 |
| TSII→III                | -648.15255 | .05501 | .06107 | .06202 | .02122  | -648.09753 | -648.09147 | -648.09053 | -648.13133 |
| III                     | -648.21084 | .06270 | .06880 | .06975 | .02827  | -648.14814 | -648.14204 | -648.14109 | -648.18256 |
| TSIII→IV                | -648.15045 | .05654 | .06279 | .06374 | .02286  | -648.09391 | -648.08766 | -648.08672 | -648.12760 |
| IV                      | -648.17534 | .05672 | .06385 | .06480 | .02137  | -648.11862 | -648.11148 | -648.11054 | -648.15397 |
| HCN                     | -93.45449  | .01636 | .01890 | .01985 | -.00300 | -93.43813  | -93.43559  | -93.43465  | -93.45749  |
| $[UC_2H_3]^+$           | -554.67847 | .03960 | .04362 | .04456 | .00945  | -554.63887 | -554.63486 | -554.63391 | -554.66902 |
| $[UC_2H_3]^+ + HCN$ (V) | -648.13297 | .05597 | .06252 | .06441 | .00646  | -648.07700 | -648.07045 | -648.06856 | -648.12651 |

Table 6.1.1:  $[UH]^+ + C_2H_3CN$  B3LYP/SDD/6-311+g(d,p) Quintet Spin Structure Coordinates

| Structure  | Coordinates |           |           |           |
|------------|-------------|-----------|-----------|-----------|
| $[UH]^+$   | U           | 0.000000  | 0.000000  | 0.021045  |
|            | H           | 0.000000  | 0.000000  | -1.936098 |
| $C_2H_3CN$ | C           | 1.084518  | 0.344036  | -0.019635 |
|            | H           | 0.914276  | -0.640466 | 0.397992  |
|            | H           | 0.427223  | 0.673058  | -0.815343 |
|            | C           | 2.073373  | 1.114763  | 0.439465  |
|            | C           | 2.345993  | 2.419922  | -0.071050 |
|            | N           | 2.586238  | 3.478529  | -0.467545 |
|            | H           | 2.726683  | 0.776254  | 1.237052  |
| II         | U           | 0.328596  | 0.474488  | -1.044486 |
|            | H           | -0.500736 | 1.953478  | 0.037776  |
|            | N           | 2.468256  | 0.771001  | -0.444646 |

|                                                |   |           |           |           |
|------------------------------------------------|---|-----------|-----------|-----------|
|                                                | C | 2.314441  | 0.156416  | 0.596532  |
|                                                | C | 2.943156  | -0.283650 | 1.814540  |
|                                                | C | 2.298785  | -0.964866 | 2.767501  |
|                                                | H | 1.251877  | -1.230915 | 2.676129  |
|                                                | H | 2.809061  | -1.268692 | 3.673221  |
|                                                | H | 3.992055  | -0.012891 | 1.914891  |
| TSII→III                                       | U | 0.519747  | 0.760629  | -0.953046 |
|                                                | H | 0.598198  | 0.420945  | 1.052096  |
|                                                | N | 2.539198  | 1.063530  | -0.319995 |
|                                                | C | 2.317221  | 0.283901  | 0.627361  |
|                                                | C | 2.966191  | -0.317259 | 1.761937  |
|                                                | C | 2.323286  | -0.829180 | 2.817620  |
|                                                | H | 1.241589  | -0.814642 | 2.887996  |
|                                                | H | 2.872706  | -1.253360 | 3.648454  |
|                                                | H | 4.051801  | -0.324370 | 1.702367  |
| III                                            | U | 0.328298  | 0.106377  | 0.461080  |
|                                                | H | 4.086742  | 0.533617  | -0.594059 |
|                                                | N | 2.366265  | -0.133046 | 0.292574  |
|                                                | C | 3.639487  | -0.184473 | 0.102805  |
|                                                | C | 4.579968  | -1.110036 | 0.722572  |
|                                                | C | 4.234396  | -2.062818 | 1.600420  |
|                                                | H | 4.975362  | -2.724937 | 2.031555  |
|                                                | H | 3.204733  | -2.204626 | 1.909625  |
|                                                | H | 5.617400  | -0.988853 | 0.429706  |
| TSIII→IV                                       | U | 3.123265  | -1.398476 | -0.024159 |
|                                                | H | 3.818421  | 2.036951  | 0.322202  |
|                                                | N | 3.020309  | 0.566623  | -1.046417 |
|                                                | C | 3.481406  | 1.065945  | -0.027919 |
|                                                | C | 4.494811  | -0.203913 | 1.398979  |
|                                                | C | 3.875528  | -0.431317 | 2.587815  |
|                                                | H | 4.414824  | -0.584109 | 3.518539  |
|                                                | H | 2.786218  | -0.439715 | 2.686153  |
|                                                | H | 5.568579  | -0.004969 | 1.373239  |
| IV                                             | U | 2.852345  | -1.431073 | -0.115824 |
|                                                | H | 3.184140  | 2.063363  | 0.507516  |
|                                                | N | 3.625729  | 0.571820  | -0.998037 |
|                                                | C | 3.224673  | 1.089765  | 0.019298  |
|                                                | C | 4.626753  | -2.111165 | 1.192893  |
|                                                | C | 3.828698  | -2.461728 | 2.209620  |
|                                                | H | 4.120275  | -2.835155 | 3.188739  |
|                                                | H | 2.716871  | -2.394189 | 2.143375  |
|                                                | H | 5.705476  | -2.189714 | 1.303802  |
| HCN                                            | C | 0.000000  | 0.000000  | -0.498334 |
|                                                | H | 0.000000  | 0.000000  | -1.564845 |
|                                                | N | -0.000000 | 0.000000  | 0.650693  |
| [UC <sub>2</sub> H <sub>3</sub> ] <sup>+</sup> | U | 3.350310  | -0.852024 | 0.087605  |
|                                                | C | 4.551117  | -2.507507 | 1.091832  |
|                                                | C | 3.978540  | -2.299097 | 2.283509  |
|                                                | H | 4.167664  | -2.827835 | 3.214952  |
|                                                | H | 3.205216  | -1.512596 | 2.439854  |
|                                                | H | 5.304103  | -3.280937 | 0.964502  |

Table 6.2: [UH]<sup>+</sup> + C<sub>2</sub>H<sub>3</sub>CN PBE1PBE/SDD/6-311+g(d,p) Quintet Spin Energies (Hartree)

| Structure                        | E0         | E_ZPE  | E_tot  | H_corr | G_corr  | E0+E_ZPE   | E0+E_tot   | E0+H_corr  | E0+G_corr  |
|----------------------------------|------------|--------|--------|--------|---------|------------|------------|------------|------------|
| [UH] <sup>+</sup>                | -477.12109 | .00377 | .00614 | .00708 | -.01913 | -477.11732 | -477.11495 | -477.11401 | -477.14021 |
| C <sub>2</sub> H <sub>3</sub> CN | -170.66582 | .05092 | .05506 | .05600 | .02505  | -170.61491 | -170.61077 | -170.60982 | -170.64078 |

|                                                          |            |        |        |        |         |            |            |            |            |
|----------------------------------------------------------|------------|--------|--------|--------|---------|------------|------------|------------|------------|
| [UH] <sup>+</sup> + C <sub>2</sub> H <sub>3</sub> CN (I) | -647.78691 | .05469 | .06119 | .06308 | .00592  | -647.73223 | -647.72572 | -647.72383 | -647.78099 |
| II                                                       | -647.85404 | .05581 | .06273 | .06368 | .02070  | -647.79823 | -647.79131 | -647.79037 | -647.83334 |
| TSII→III                                                 | -647.84618 | .05603 | .06188 | .06282 | .02247  | -647.79015 | -647.78430 | -647.78336 | -647.82371 |
| III                                                      | -647.89744 | .06308 | .06919 | .07013 | .02863  | -647.83436 | -647.82825 | -647.82731 | -647.86881 |
| TSIII→IV                                                 | -647.84490 | .05689 | .06296 | .06390 | .02358  | -647.78802 | -647.78195 | -647.78100 | -647.82132 |
| IV                                                       | -647.86523 | .05727 | .06430 | .06524 | .02207  | -647.80796 | -647.80093 | -647.79999 | -647.84316 |
| HCN                                                      | -93.33544  | .01649 | .01903 | .01997 | -.00287 | -93.31895  | -93.31641  | -93.31547  | -93.33831  |
| [UC <sub>2</sub> H <sub>3</sub> ] <sup>+</sup>           | -554.47741 | .03982 | .04378 | .04472 | .00977  | -554.43759 | -554.43363 | -554.43269 | -554.46764 |
| [UC <sub>2</sub> H <sub>3</sub> ] <sup>+</sup> + HCN (V) | -647.81285 | .05632 | .06281 | .06469 | .00690  | -647.75653 | -647.75004 | -647.74816 | -647.80594 |

Table 6.2.1: [UH]<sup>+</sup> + C<sub>2</sub>H<sub>3</sub>CN PBE1PBE/SDD/6-311+g(d,p) Quintet Spin Structure Coordinates

| Structure                        | Coordinates |           |           |           |
|----------------------------------|-------------|-----------|-----------|-----------|
| [UH] <sup>+</sup>                | U           | -0.282792 | 0.024095  | 0.017719  |
|                                  | H           | -0.733284 | 1.219330  | 1.490648  |
| C <sub>2</sub> H <sub>3</sub> CN | C           | 1.086352  | 0.346666  | -0.019481 |
|                                  | H           | 0.914460  | -0.638959 | 0.397278  |
|                                  | H           | 0.431026  | 0.680535  | -0.816207 |
|                                  | C           | 2.074126  | 1.113793  | 0.440727  |
|                                  | C           | 2.343110  | 2.415483  | -0.071108 |
|                                  | N           | 2.580985  | 3.473049  | -0.469180 |
|                                  | H           | 2.728243  | 0.775529  | 1.238906  |
| II                               | U           | 0.370273  | 0.455008  | -1.018539 |
|                                  | H           | -0.453536 | 1.858359  | 0.143937  |
|                                  | N           | 2.493059  | 0.791861  | -0.455660 |
|                                  | C           | 2.319008  | 0.167635  | 0.578266  |
|                                  | C           | 2.936280  | -0.279980 | 1.795351  |
|                                  | C           | 2.269143  | -0.938626 | 2.745249  |
|                                  | H           | 1.215023  | -1.176815 | 2.645589  |
|                                  | H           | 2.764883  | -1.250037 | 3.657769  |
| TSII→III                         | U           | 0.538456  | 0.698568  | -0.908284 |
|                                  | H           | 0.559041  | 0.466605  | 1.088914  |
|                                  | N           | 2.557278  | 1.067003  | -0.319420 |
|                                  | C           | 2.325122  | 0.285731  | 0.623094  |
|                                  | C           | 2.976377  | -0.317581 | 1.753072  |
|                                  | C           | 2.319418  | -0.828281 | 2.796869  |
|                                  | H           | 1.235213  | -0.808835 | 2.847670  |
|                                  | H           | 2.855673  | -1.252486 | 3.637821  |
| III                              | U           | 0.353496  | 0.077047  | 0.481766  |
|                                  | H           | 4.082949  | 0.536366  | -0.596730 |
|                                  | N           | 2.373316  | -0.140521 | 0.297511  |
|                                  | C           | 3.642745  | -0.185086 | 0.102352  |
|                                  | C           | 4.581617  | -1.106568 | 0.719225  |
|                                  | C           | 4.225982  | -2.054034 | 1.595017  |
|                                  | H           | 4.960371  | -2.721432 | 2.031895  |
|                                  | H           | 3.191191  | -2.185318 | 1.896510  |
| TSIII→IV                         | U           | 3.064579  | -1.324181 | 0.072478  |
|                                  | H           | 3.841932  | 2.025206  | 0.298776  |
|                                  | N           | 3.008003  | 0.552743  | -1.040502 |
|                                  | C           | 3.475520  | 1.049408  | -0.013286 |
|                                  | C           | 4.538381  | -0.208483 | 1.388759  |

|                                                |   |           |           |           |
|------------------------------------------------|---|-----------|-----------|-----------|
|                                                | C | 3.888058  | -0.451670 | 2.557814  |
|                                                | H | 4.377074  | -0.568108 | 3.520838  |
|                                                | H | 2.788938  | -0.509892 | 2.608768  |
|                                                | H | 5.600876  | 0.041998  | 1.394788  |
| IV                                             | U | 2.889574  | -1.467483 | -0.162560 |
|                                                | H | 3.122940  | 1.950908  | 0.629034  |
|                                                | N | 3.684908  | 0.554033  | -0.925745 |
|                                                | C | 3.213302  | 1.004943  | 0.093477  |
|                                                | C | 4.642501  | -2.147776 | 1.132919  |
|                                                | C | 3.822544  | -2.374706 | 2.164399  |
|                                                | H | 4.081170  | -2.689973 | 3.173725  |
|                                                | H | 2.712676  | -2.249824 | 2.087266  |
|                                                | H | 5.715344  | -2.278198 | 1.258866  |
| HCN                                            | C | 0.000000  | 0.000000  | -0.497856 |
|                                                | H | 0.000000  | 0.000000  | -1.566083 |
|                                                | N | -0.000000 | -0.000000 | 0.650460  |
| [UC <sub>2</sub> H <sub>3</sub> ] <sup>+</sup> | U | 3.328212  | -0.852125 | 0.158389  |
|                                                | C | 4.556924  | -2.507581 | 1.077347  |
|                                                | C | 3.985713  | -2.301507 | 2.267099  |
|                                                | H | 4.167634  | -2.824811 | 3.204207  |
|                                                | H | 3.207254  | -1.513679 | 2.430146  |
|                                                | H | 5.311214  | -3.280294 | 0.945067  |

Table 6.3: [UH]<sup>+</sup> + C<sub>2</sub>H<sub>3</sub>CN B3LYP/SDD/6-311+g(d,p) Singlet Spin Energies (Hartree)

| Structure                                                | E0         | E_ZPE  | E_tot  | H_corr | G_corr  | E0+E_ZPE   | E0+E_tot   | E0+H_corr  | E0+G_corr  |
|----------------------------------------------------------|------------|--------|--------|--------|---------|------------|------------|------------|------------|
| [UH] <sup>+</sup>                                        | -477.13768 | .00368 | .00605 | .00699 | -.01769 | -477.13400 | -477.13164 | -477.13069 | -477.15538 |
| C <sub>2</sub> H <sub>3</sub> CN                         | -170.88287 | .05058 | .05473 | .05567 | .02471  | -170.83229 | -170.82814 | -170.82720 | -170.85817 |
| [UH] <sup>+</sup> + C <sub>2</sub> H <sub>3</sub> CN (I) | -648.02056 | .05426 | .06077 | .06266 | .00701  | -647.96630 | -647.95978 | -647.95789 | -648.01354 |
| II                                                       | -648.12609 | .05603 | .06249 | .06343 | .02362  | -648.07006 | -648.06360 | -648.06265 | -648.10247 |
| TSII→III                                                 | -648.10095 | .05601 | .06171 | .06266 | .02399  | -648.04495 | -648.03924 | -648.03829 | -648.07696 |
| III                                                      | -648.12605 | .06250 | .06861 | .06955 | .02965  | -648.06354 | -648.05744 | -648.05650 | -648.09640 |
| TSIII→IV                                                 | -648.09964 | .05754 | .06326 | .06420 | .02581  | -648.04210 | -648.03638 | -648.03544 | -648.07383 |
| IV                                                       | -648.13635 | .05745 | .06397 | .06491 | .02524  | -648.07890 | -648.07238 | -648.07144 | -648.11111 |
| HCN                                                      | -93.45449  | .01636 | .01890 | .01985 | -.00300 | -93.43813  | -93.43559  | -93.43465  | -93.45749  |
| [UC <sub>2</sub> H <sub>3</sub> ] <sup>+</sup>           | -554.58948 | .03906 | .04321 | .04416 | .01034  | -554.55042 | -554.54627 | -554.54532 | -554.57914 |
| [UC <sub>2</sub> H <sub>3</sub> ] <sup>+</sup> + HCN (V) | -648.04397 | .05542 | .06211 | .06400 | .00734  | -647.98855 | -647.98186 | -647.97997 | -648.03663 |

Table 6.3.1: [UH]<sup>+</sup> + C<sub>2</sub>H<sub>3</sub>CN B3LYP/SDD/6-311+g(d,p) Singlet Spin Structure Coordinates

| Structure                        | Coordinates |           |           |           |
|----------------------------------|-------------|-----------|-----------|-----------|
| [UH] <sup>+</sup>                | U           | -0.274048 | 0.000897  | -0.010869 |
|                                  | H           | -0.723542 | 1.193481  | 1.458793  |
| C <sub>2</sub> H <sub>3</sub> CN | C           | 1.084518  | 0.344036  | -0.019635 |
|                                  | H           | 0.914276  | -0.640466 | 0.397992  |
|                                  | H           | 0.427223  | 0.673058  | -0.815343 |
|                                  | C           | 2.073373  | 1.114763  | 0.439465  |
|                                  | C           | 2.345993  | 2.419922  | -0.071050 |
|                                  | N           | 2.586238  | 3.478529  | -0.467545 |
|                                  | H           | 2.726683  | 0.776254  | 1.237052  |

|                                                |   |           |           |           |
|------------------------------------------------|---|-----------|-----------|-----------|
| II                                             | U | 0.536899  | 0.494706  | -0.977318 |
|                                                | H | -0.328407 | 1.985356  | -0.031239 |
|                                                | N | 2.417948  | 0.778867  | -0.424546 |
|                                                | C | 2.072134  | 0.089634  | 0.622319  |
|                                                | C | 2.842180  | -0.261008 | 1.786216  |
|                                                | C | 2.313886  | -0.991486 | 2.780712  |
|                                                | H | 1.288753  | -1.343774 | 2.744291  |
|                                                | H | 2.893636  | -1.251869 | 3.658423  |
|                                                | H | 3.868463  | 0.093941  | 1.832600  |
| TSII→III                                       | U | 0.700672  | 0.680664  | -0.924083 |
|                                                | H | 0.766759  | 0.829244  | 1.063751  |
|                                                | N | 2.525018  | 0.951864  | -0.400910 |
|                                                | C | 2.086191  | 0.169296  | 0.632694  |
|                                                | C | 2.866271  | -0.297918 | 1.761368  |
|                                                | C | 2.331768  | -0.905991 | 2.826859  |
|                                                | H | 1.263223  | -1.068059 | 2.921688  |
|                                                | H | 2.952791  | -1.238897 | 3.649214  |
|                                                | H | 3.937245  | -0.130009 | 1.694209  |
| III                                            | U | 0.379235  | 0.004103  | 0.321961  |
|                                                | H | 4.062205  | 0.580915  | -0.537280 |
|                                                | N | 2.366102  | -0.058270 | 0.416658  |
|                                                | C | 3.633647  | -0.153414 | 0.150800  |
|                                                | C | 4.562752  | -1.123875 | 0.696296  |
|                                                | C | 4.237032  | -2.063544 | 1.599509  |
|                                                | H | 4.982319  | -2.743923 | 1.992984  |
|                                                | H | 3.224011  | -2.171574 | 1.970628  |
|                                                | H | 5.585347  | -1.039211 | 0.344722  |
| TSIII→IV                                       | U | 3.085074  | -1.219187 | -0.090065 |
|                                                | H | 3.578484  | 1.932719  | 0.427201  |
|                                                | N | 3.361566  | 0.405019  | -1.093051 |
|                                                | C | 3.380872  | 0.895449  | 0.178753  |
|                                                | C | 4.455296  | -0.121527 | 1.366031  |
|                                                | C | 3.888241  | -0.364071 | 2.572539  |
|                                                | H | 4.471236  | -0.641046 | 3.444673  |
|                                                | H | 2.820936  | -0.216774 | 2.739285  |
|                                                | H | 5.541659  | -0.063560 | 1.243066  |
| IV                                             | U | 3.072060  | -1.387462 | -0.313742 |
|                                                | H | 2.785056  | 1.758861  | 0.655081  |
|                                                | N | 3.941870  | 0.427241  | -0.522008 |
|                                                | C | 2.988611  | 0.758344  | 0.271201  |
|                                                | C | 4.656951  | -2.275523 | 1.026050  |
|                                                | C | 3.859903  | -2.156972 | 2.092909  |
|                                                | H | 4.043599  | -2.494499 | 3.109844  |
|                                                | H | 2.898703  | -1.590615 | 2.046742  |
|                                                | H | 5.638209  | -2.737452 | 1.085305  |
| HCN                                            | C | 0.000000  | 0.000000  | -0.498334 |
|                                                | H | 0.000000  | 0.000000  | -1.564845 |
|                                                | N | -0.000000 | 0.000000  | 0.650693  |
| [UC <sub>2</sub> H <sub>3</sub> ] <sup>+</sup> | U | 3.322525  | -0.907163 | 0.161934  |
|                                                | C | 4.533955  | -2.545733 | 1.071754  |
|                                                | C | 3.998156  | -2.270800 | 2.270159  |
|                                                | H | 4.190777  | -2.759984 | 3.221317  |
|                                                | H | 3.250096  | -1.453857 | 2.414850  |
|                                                | H | 5.261441  | -3.342459 | 0.942241  |

Table 6.4: [UH]<sup>+</sup> + C<sub>2</sub>H<sub>3</sub>CN PBE1PBE/SDD/6-311+g(d,p) Singlet Spin Energies (Hartree)

| Structure | E0 | E_ZPE | E_tot | H_corr | G_corr | E0+E_ZPE | E0+E_tot | E0+H_corr | E0+G_corr |
|-----------|----|-------|-------|--------|--------|----------|----------|-----------|-----------|
|-----------|----|-------|-------|--------|--------|----------|----------|-----------|-----------|

|                                                          |            |        |        |        |         |            |            |            |            |
|----------------------------------------------------------|------------|--------|--------|--------|---------|------------|------------|------------|------------|
| [UH] <sup>+</sup>                                        | -477.01929 | .00372 | .00608 | .00703 | -.01765 | -477.01557 | -477.01321 | -477.01226 | -477.03694 |
| C <sub>2</sub> H <sub>3</sub> CN                         | -170.66582 | .05092 | .05506 | .05600 | .02505  | -170.61491 | -170.61077 | -170.60982 | -170.64078 |
| [UH] <sup>+</sup> + C <sub>2</sub> H <sub>3</sub> CN (I) | -647.68511 | .05463 | .06114 | .06303 | .00740  | -647.63048 | -647.62397 | -647.62209 | -647.67771 |
| II                                                       | -647.81238 | .05643 | .06290 | .06385 | .02399  | -647.75595 | -647.74948 | -647.74853 | -647.78839 |
| TSII→III                                                 | -647.79387 | .05643 | .06206 | .06300 | .02465  | -647.73744 | -647.73181 | -647.73087 | -647.76922 |
| III                                                      | -647.80182 | .06273 | .06888 | .06982 | .02963  | -647.73909 | -647.73294 | -647.73200 | -647.77219 |
| TSIII→IV                                                 | -647.79397 | .05779 | .06353 | .06447 | .02589  | -647.73618 | -647.73044 | -647.72950 | -647.76808 |
| IV                                                       | -647.82757 | .05817 | .06444 | .06538 | .02643  | -647.76940 | -647.76314 | -647.76219 | -647.80115 |
| HCN                                                      | -93.33544  | .01649 | .01903 | .01997 | -.00287 | -93.31895  | -93.31641  | -93.31547  | -93.33831  |
| [UC <sub>2</sub> H <sub>3</sub> ] <sup>+</sup>           | -554.37884 | .03919 | .04331 | .04426 | .01052  | -554.33965 | -554.33553 | -554.33458 | -554.36832 |
| [UC <sub>2</sub> H <sub>3</sub> ] <sup>+</sup> + HCN (V) | -647.71428 | .05568 | .06234 | .06423 | .00766  | -647.65860 | -647.65194 | -647.65005 | -647.70662 |

Table 6.4.1: [UH]<sup>+</sup> + C<sub>2</sub>H<sub>3</sub>CN PBE1PBE/SDD/6-311+g(d,p) Singlet Spin Structure Coordinates

| Structure                        | Coordinates |           |           |           |
|----------------------------------|-------------|-----------|-----------|-----------|
| [UH] <sup>+</sup>                | U           | -0.274832 | 0.002976  | -0.008307 |
|                                  | H           | -0.722758 | 1.191402  | 1.456231  |
| C <sub>2</sub> H <sub>3</sub> CN | C           | 1.086352  | 0.346666  | -0.019481 |
|                                  | H           | 0.914460  | -0.638959 | 0.397278  |
|                                  | H           | 0.431026  | 0.680535  | -0.816207 |
|                                  | C           | 2.074126  | 1.113793  | 0.440727  |
|                                  | C           | 2.343110  | 2.415483  | -0.071108 |
|                                  | N           | 2.580985  | 3.473049  | -0.469180 |
|                                  | H           | 2.728243  | 0.775529  | 1.238906  |
| II                               | U           | 0.565155  | 0.483198  | -0.957638 |
|                                  | H           | -0.291026 | 1.936125  | 0.029185  |
|                                  | N           | 2.425951  | 0.782632  | -0.431865 |
|                                  | C           | 2.064909  | 0.091432  | 0.614309  |
|                                  | C           | 2.835062  | -0.254417 | 1.774991  |
|                                  | C           | 2.298876  | -0.978273 | 2.766917  |
|                                  | H           | 1.270357  | -1.323539 | 2.723932  |
|                                  | H           | 2.873007  | -1.239862 | 3.649361  |
|                                  | H           | 3.863201  | 0.097072  | 1.822266  |
| TSII→III                         | U           | 0.700672  | 0.680664  | -0.924083 |
|                                  | H           | 0.766759  | 0.829244  | 1.063751  |
|                                  | N           | 2.525018  | 0.951864  | -0.400910 |
|                                  | C           | 2.086191  | 0.169296  | 0.632694  |
|                                  | C           | 2.866271  | -0.297918 | 1.761368  |
|                                  | C           | 2.331768  | -0.905991 | 2.826859  |
|                                  | H           | 1.263223  | -1.068059 | 2.921688  |
|                                  | H           | 2.952791  | -1.238897 | 3.649214  |
|                                  | H           | 3.938116  | -0.130331 | 1.692912  |
| III                              | U           | 0.431231  | -0.077548 | 0.258478  |
|                                  | H           | 4.054543  | 0.612780  | -0.501666 |
|                                  | N           | 2.374581  | -0.027115 | 0.480247  |
|                                  | C           | 3.633048  | -0.136498 | 0.174793  |
|                                  | C           | 4.550971  | -1.131689 | 0.678332  |
|                                  | C           | 4.229714  | -2.054419 | 1.597193  |
|                                  | H           | 4.968934  | -2.752976 | 1.972512  |
|                                  | H           | 3.225447  | -2.126219 | 2.003595  |
|                                  | H           | 5.564182  | -1.075111 | 0.292794  |
| TSIII→IV                         | U           | 3.085074  | -1.219187 | -0.090065 |
|                                  | H           | 3.578484  | 1.932719  | 0.427201  |

|                                                |   |           |           |           |
|------------------------------------------------|---|-----------|-----------|-----------|
|                                                | N | 3.361566  | 0.405019  | -1.093051 |
|                                                | C | 3.380872  | 0.895449  | 0.178753  |
|                                                | C | 4.455296  | -0.121527 | 1.366031  |
|                                                | C | 3.888241  | -0.364071 | 2.572539  |
|                                                | H | 4.471236  | -0.641046 | 3.444673  |
|                                                | H | 2.820936  | -0.216774 | 2.739285  |
|                                                | H | 5.543038  | -0.061101 | 1.245555  |
| IV                                             | U | 3.081461  | -1.403305 | -0.297073 |
|                                                | H | 2.759304  | 1.678787  | 0.708227  |
|                                                | N | 3.966872  | 0.378356  | -0.449905 |
|                                                | C | 2.975679  | 0.683410  | 0.316452  |
|                                                | C | 4.670273  | -2.272419 | 0.998285  |
|                                                | C | 3.858395  | -2.104933 | 2.045656  |
|                                                | H | 4.000495  | -2.423887 | 3.075750  |
|                                                | H | 2.942915  | -1.456716 | 1.977406  |
|                                                | H | 5.629567  | -2.777371 | 1.076583  |
| HCN                                            | C | 0.000000  | 0.000000  | -0.497856 |
|                                                | H | 0.000000  | 0.000000  | -1.566083 |
|                                                | N | -0.000000 | -0.000000 | 0.650460  |
| [UC <sub>2</sub> H <sub>3</sub> ] <sup>+</sup> | U | 3.359061  | -0.880159 | 0.238854  |
|                                                | C | 4.606685  | -2.487049 | 1.077758  |
|                                                | C | 3.958407  | -2.305099 | 2.238611  |
|                                                | H | 4.097069  | -2.830724 | 3.180558  |
|                                                | H | 3.148587  | -1.538948 | 2.370254  |
|                                                | H | 5.387142  | -3.238017 | 0.976220  |

Table 6.5: [UH]<sup>+</sup> + C<sub>2</sub>H<sub>3</sub>CN B3LYP/SDD/6-311+g(d,p) Triplet Spin Energies (Hartree)

| Structure                                                | E0         | E_ZPE  | E_tot  | H_corr | G_corr  | E0+E_ZPE   | E0+E_tot   | E0+H_corr  | E0+G_corr  |
|----------------------------------------------------------|------------|--------|--------|--------|---------|------------|------------|------------|------------|
| [UH] <sup>+</sup>                                        | -477.14828 | .00361 | .00597 | .00691 | -.01880 | -477.14467 | -477.14231 | -477.14136 | -477.16708 |
| C <sub>2</sub> H <sub>3</sub> CN                         | -170.88287 | .05058 | .05473 | .05567 | .02471  | -170.83229 | -170.82814 | -170.82720 | -170.85817 |
| [UH] <sup>+</sup> + C <sub>2</sub> H <sub>3</sub> CN (I) | -648.03115 | .05419 | .06070 | .06259 | .00591  | -647.97697 | -647.97045 | -647.96856 | -648.02524 |
| II                                                       | -648.17053 | .05539 | .06219 | .06314 | .02136  | -648.11514 | -648.10834 | -648.10740 | -648.14917 |
| TSII→III                                                 | -648.14864 | .05551 | .06136 | .06230 | .02245  | -648.09313 | -648.08729 | -648.08634 | -648.12620 |
| III                                                      | -648.17570 | .06228 | .06838 | .06933 | .02844  | -648.11342 | -648.10731 | -648.10637 | -648.14726 |
| TSIII→IV                                                 | -648.14498 | .05747 | .06347 | .06442 | .02431  | -648.08751 | -648.08151 | -648.08057 | -648.12067 |
| IV                                                       | -648.17961 | .05683 | .06389 | .06484 | .02194  | -648.12279 | -648.11572 | -648.11478 | -648.15768 |
| HCN                                                      | -93.45449  | .01636 | .01890 | .01985 | -.00300 | -93.43813  | -93.43559  | -93.43465  | -93.45749  |
| [UC <sub>2</sub> H <sub>3</sub> ] <sup>+</sup>           | -554.64803 | .03958 | .04359 | .04453 | .00993  | -554.60845 | -554.60444 | -554.60349 | -554.63810 |
| [UC <sub>2</sub> H <sub>3</sub> ] <sup>+</sup> + HCN (V) | -648.10252 | .05595 | .06249 | .06438 | .00693  | -648.04658 | -648.04003 | -648.03814 | -648.09559 |

Table 6.5.1: [UH]<sup>+</sup> + C<sub>2</sub>H<sub>3</sub>CN B3LYP/SDD/6-311+g(d,p) Triplet Spin Structure Coordinates

| Structure                        | Coordinates |           |           |           |
|----------------------------------|-------------|-----------|-----------|-----------|
| [UH] <sup>+</sup>                | U           | -0.275143 | 0.003800  | -0.007291 |
|                                  | H           | -0.722447 | 1.190578  | 1.455215  |
| C <sub>2</sub> H <sub>3</sub> CN | C           | 1.084518  | 0.344036  | -0.019635 |
|                                  | H           | 0.914276  | -0.640466 | 0.397992  |
|                                  | H           | 0.427223  | 0.673058  | -0.815343 |
|                                  | C           | 2.073373  | 1.114763  | 0.439465  |
|                                  | C           | 2.345993  | 2.419922  | -0.071050 |
|                                  | N           | 2.586238  | 3.478529  | -0.467545 |

|                                                |   |           |           |           |
|------------------------------------------------|---|-----------|-----------|-----------|
|                                                | H | 2.726683  | 0.776254  | 1.237052  |
| II                                             | U | 0.473656  | 0.504383  | -1.007441 |
|                                                | H | -0.423137 | 1.984461  | -0.035440 |
|                                                | N | 2.438875  | 0.775090  | -0.417395 |
|                                                | C | 2.143139  | 0.109601  | 0.619074  |
|                                                | C | 2.880165  | -0.272470 | 1.797347  |
|                                                | C | 2.316959  | -0.987135 | 2.781625  |
|                                                | H | 1.282297  | -1.308126 | 2.731953  |
|                                                | H | 2.877690  | -1.264639 | 3.666269  |
|                                                | H | 3.915846  | 0.053203  | 1.855464  |
| TSII→III                                       | U | 0.620246  | 0.710623  | -0.969191 |
|                                                | H | 0.657580  | 0.519785  | 1.053003  |
|                                                | N | 2.519849  | 1.090307  | -0.305235 |
|                                                | C | 2.219701  | 0.246388  | 0.625043  |
|                                                | C | 2.922155  | -0.319520 | 1.750054  |
|                                                | C | 2.326315  | -0.849891 | 2.825579  |
|                                                | H | 1.247358  | -0.864828 | 2.933965  |
|                                                | H | 2.910955  | -1.254326 | 3.642087  |
|                                                | H | 4.005779  | -0.288345 | 1.669484  |
| III                                            | U | 0.383216  | 0.144823  | 0.515653  |
|                                                | H | 4.068802  | 0.522052  | -0.609584 |
|                                                | N | 2.345540  | -0.184408 | 0.244999  |
|                                                | C | 3.633081  | -0.199734 | 0.088340  |
|                                                | C | 4.575321  | -1.094020 | 0.733207  |
|                                                | C | 4.231810  | -2.063750 | 1.597423  |
|                                                | H | 4.978840  | -2.713166 | 2.037203  |
|                                                | H | 3.199576  | -2.232852 | 1.882691  |
|                                                | H | 5.616463  | -0.947738 | 0.466345  |
| TSIII→IV                                       | U | 3.115461  | -1.317354 | -0.245737 |
|                                                | H | 3.518985  | 1.910127  | 0.515707  |
|                                                | N | 3.397034  | 0.501929  | -1.109010 |
|                                                | C | 3.386117  | 0.902610  | 0.132881  |
|                                                | C | 4.411102  | -0.181207 | 1.373387  |
|                                                | C | 3.899912  | -0.316731 | 2.610825  |
|                                                | H | 4.519242  | -0.534964 | 3.475957  |
|                                                | H | 2.836923  | -0.178619 | 2.808300  |
|                                                | H | 5.498589  | -0.178768 | 1.226122  |
| IV                                             | U | 2.995989  | -1.365841 | -0.251639 |
|                                                | H | 3.180680  | 1.913340  | 0.659454  |
|                                                | N | 3.640753  | 0.553625  | -0.906568 |
|                                                | C | 3.186062  | 0.923373  | 0.198002  |
|                                                | C | 4.644001  | -2.166540 | 1.130166  |
|                                                | C | 3.798480  | -2.347768 | 2.151070  |
|                                                | H | 4.025161  | -2.713047 | 3.150136  |
|                                                | H | 2.711503  | -2.110289 | 2.071993  |
|                                                | H | 5.702333  | -2.384929 | 1.248768  |
| HCN                                            | C | 0.000000  | 0.000000  | -0.498334 |
|                                                | H | 0.000000  | 0.000000  | -1.564845 |
|                                                | N | -0.000000 | 0.000000  | 0.650693  |
| [UC <sub>2</sub> H <sub>3</sub> ] <sup>+</sup> | U | 3.353285  | -0.847099 | 0.103208  |
|                                                | C | 4.543881  | -2.511123 | 1.085943  |
|                                                | C | 3.979833  | -2.298936 | 2.281948  |
|                                                | H | 4.181270  | -2.820615 | 3.214732  |
|                                                | H | 3.198499  | -1.521334 | 2.441128  |
|                                                | H | 5.300181  | -3.280889 | 0.955296  |

Table 6.6: [UH]<sup>+</sup> + C<sub>2</sub>H<sub>3</sub>CN PBE1PBE/SDD/6-311+g(d,p) Triplet Spin Energies (Hartree)

| Structure                                                | E0         | E_ZPE  | E_tot  | H_corr | G_corr  | E0+E_ZPE   | E0+E_tot   | E0+H_corr  | E0+G_corr  |
|----------------------------------------------------------|------------|--------|--------|--------|---------|------------|------------|------------|------------|
| [UH] <sup>+</sup>                                        | -477.06589 | .00353 | .00589 | .00684 | -.01891 | -477.06236 | -477.06000 | -477.05905 | -477.08480 |
| C <sub>2</sub> H <sub>3</sub> CN                         | -170.66582 | .05092 | .05506 | .05600 | .02505  | -170.61491 | -170.61077 | -170.60982 | -170.64078 |
| [UH] <sup>+</sup> + C <sub>2</sub> H <sub>3</sub> CN (I) | -647.73171 | .05444 | .06095 | .06284 | .00614  | -647.67727 | -647.67076 | -647.66888 | -647.72557 |
| II                                                       | -647.85863 | .05597 | .06266 | .06361 | .02214  | -647.80266 | -647.79596 | -647.79502 | -647.83648 |
| TSII→III                                                 | -647.84316 | .05597 | .06180 | .06275 | .02291  | -647.78719 | -647.78136 | -647.78042 | -647.82025 |
| III                                                      | -647.86579 | .06296 | .06907 | .07001 | .02893  | -647.80283 | -647.79672 | -647.79578 | -647.83686 |
| TSIII→IV                                                 | -647.84118 | .05775 | .06354 | .06449 | .02526  | -647.78344 | -647.77764 | -647.77670 | -647.81592 |
| IV                                                       | -647.87064 | .05756 | .06441 | .06536 | .02315  | -647.81308 | -647.80623 | -647.80528 | -647.84749 |
| HCN                                                      | -93.33544  | .01649 | .01903 | .01997 | -.00287 | -93.31895  | -93.31641  | -93.31547  | -93.33831  |
| [UC <sub>2</sub> H <sub>3</sub> ] <sup>+</sup>           | -554.44537 | .03981 | .04377 | .04471 | .01025  | -554.40556 | -554.40161 | -554.40066 | -554.43512 |
| [UC <sub>2</sub> H <sub>3</sub> ] <sup>+</sup> + HCN (V) | -647.78081 | .05630 | .06279 | .06468 | .00738  | -647.72451 | -647.71802 | -647.71613 | -647.77343 |

Table 6.6.1: [UH]<sup>+</sup> + C<sub>2</sub>H<sub>3</sub>CN PBE1PBE/SDD/6-311+g(d,p) Triplet Spin Structure Coordinates

| Structure                        | Coordinates |           |           |           |
|----------------------------------|-------------|-----------|-----------|-----------|
| [UH] <sup>+</sup>                | U           | -0.280565 | 0.018185  | 0.010435  |
|                                  | H           | -0.735512 | 1.225240  | 1.497931  |
| C <sub>2</sub> H <sub>3</sub> CN | C           | 1.086352  | 0.346666  | -0.019481 |
|                                  | H           | 0.914460  | -0.638959 | 0.397278  |
|                                  | H           | 0.431026  | 0.680535  | -0.816207 |
|                                  | C           | 2.074126  | 1.113793  | 0.440727  |
|                                  | C           | 2.343110  | 2.415483  | -0.071108 |
|                                  | N           | 2.580985  | 3.473049  | -0.469180 |
|                                  | H           | 2.728243  | 0.775529  | 1.238906  |
| II                               | U           | 0.506039  | 0.485647  | -0.967246 |
|                                  | H           | -0.375285 | 1.967303  | -0.019136 |
|                                  | N           | 2.431554  | 0.781775  | -0.414073 |
|                                  | C           | 2.110834  | 0.103390  | 0.620909  |
|                                  | C           | 2.866726  | -0.265489 | 1.785499  |
|                                  | C           | 2.311594  | -0.981840 | 2.771127  |
|                                  | H           | 1.276484  | -1.305747 | 2.722006  |
|                                  | H           | 2.876287  | -1.257387 | 3.655381  |
|                                  | H           | 3.901258  | 0.066717  | 1.836990  |
| TSII→III                         | U           | 0.637883  | 0.686561  | -0.925362 |
|                                  | H           | 0.641031  | 0.563990  | 1.072981  |
|                                  | N           | 2.529377  | 1.077287  | -0.309593 |
|                                  | C           | 2.219562  | 0.234863  | 0.619780  |
|                                  | C           | 2.926830  | -0.324297 | 1.741877  |
|                                  | C           | 2.322702  | -0.849483 | 2.811821  |
|                                  | H           | 1.241099  | -0.864102 | 2.906213  |
|                                  | H           | 2.899890  | -1.247406 | 3.638315  |
|                                  | H           | 4.011564  | -0.287220 | 1.668759  |
| III                              | U           | 0.383216  | 0.144823  | 0.515653  |
|                                  | H           | 4.068802  | 0.522052  | -0.609584 |
|                                  | N           | 2.345540  | -0.184408 | 0.244999  |
|                                  | C           | 3.633081  | -0.199734 | 0.088340  |
|                                  | C           | 4.575321  | -1.094020 | 0.733207  |
|                                  | C           | 4.231810  | -2.063750 | 1.597423  |
|                                  | H           | 4.978840  | -2.713166 | 2.037203  |
|                                  | H           | 3.199576  | -2.232852 | 1.882691  |
|                                  | H           | 5.616463  | -0.947738 | 0.466345  |

|                                                |   |           |           |           |
|------------------------------------------------|---|-----------|-----------|-----------|
| TSIII→IV                                       | U | 2.863244  | -1.183431 | 0.110326  |
|                                                | H | 3.852134  | 1.967503  | 0.271767  |
|                                                | N | 3.259105  | 0.399713  | -1.075131 |
|                                                | C | 3.459937  | 0.970013  | 0.081507  |
|                                                | C | 4.445584  | -0.056957 | 1.390650  |
|                                                | C | 3.909153  | -0.459307 | 2.554884  |
|                                                | H | 4.470527  | -0.637050 | 3.467794  |
|                                                | H | 2.817106  | -0.569125 | 2.681583  |
|                                                | H | 5.506573  | 0.175664  | 1.305052  |
| IV                                             | U | 3.040594  | -1.418503 | -0.283934 |
|                                                | H | 2.959674  | 1.772905  | 0.730696  |
|                                                | N | 3.745308  | 0.487889  | -0.754761 |
|                                                | C | 3.074145  | 0.789765  | 0.267158  |
|                                                | C | 4.662621  | -2.273050 | 1.049975  |
|                                                | C | 3.850673  | -2.188958 | 2.106699  |
|                                                | H | 4.055722  | -2.460153 | 3.140695  |
|                                                | H | 2.816194  | -1.765989 | 2.035548  |
|                                                | H | 5.680030  | -2.641983 | 1.159305  |
| HCN                                            | C | 0.000000  | 0.000000  | -0.497856 |
|                                                | H | 0.000000  | 0.000000  | -1.566083 |
|                                                | N | -0.000000 | -0.000000 | 0.650460  |
| [UC <sub>2</sub> H <sub>3</sub> ] <sup>+</sup> | U | 3.356122  | -0.852170 | 0.158197  |
|                                                | C | 4.550935  | -2.519726 | 1.075873  |
|                                                | C | 3.982028  | -2.294217 | 2.265011  |
|                                                | H | 4.168878  | -2.803877 | 3.208207  |
|                                                | H | 3.196985  | -1.512650 | 2.418091  |
|                                                | H | 5.302004  | -3.297355 | 0.956875  |

Table 6.7.1: [UH]<sup>+</sup> + C<sub>2</sub>H<sub>3</sub>CN B3LYP/SDD/6-311+g(d,p) Quintet Spin Relative Energies (kJ/mol)

| Structure     | EO+E_ZPE | EO+E_tot | EO+H_cor<br>r | EO+G_cor<br>r |
|---------------|----------|----------|---------------|---------------|
| Reactants (I) | 0        | 0        | 0             | 0             |
| II            | -215.84  | -214.761 | -217.242      | -179.744      |
| TSII→III      | -179.445 | -180.637 | -183.118      | -140.099      |
| III           | -312.316 | -313.388 | -315.869      | -274.625      |
| TSIII→IV      | -169.941 | -170.631 | -173.11       | -130.311      |
| IV            | -234.798 | -233.176 | -235.657      | -199.546      |
| Products (V)  | -125.546 | -125.439 | -125.441      | -127.46       |

Table 6.7.2: [UH]<sup>+</sup> + C<sub>2</sub>H<sub>3</sub>CN PBE1PBE/SDD/6-311+g(d,p) Quintet Spin Relative Energies (kJ/mol)

| Structure     | EO+E_ZPE | EO+E_tot | EO+H_cor<br>r | EO+G_cor<br>r |
|---------------|----------|----------|---------------|---------------|
| Reactants (I) | 0        | 0        | 0             | 0             |
| II            | -173.291 | -172.207 | -174.685      | -137.45       |
| TSII→III      | -152.069 | -153.802 | -156.28       | -112.164      |
| III           | -268.153 | -269.2   | -271.676      | -230.571      |
| TSIII→IV      | -146.474 | -147.621 | -150.1        | -105.892      |
| IV            | -198.834 | -197.466 | -199.945      | -163.233      |
| Products (V)  | -63.8154 | -63.8574 | -63.8574      | -65.5141      |

Table 6.7.3: [UH]<sup>+</sup> + C<sub>2</sub>H<sub>3</sub>CN B3LYP/SDD/6-311+g(d,p) Singlet Spin Relative Energies (kJ/mol)

| Structure     | E0+E_ZPE | E0+E_tot | E0+H_cor<br>r | E0+G_cor<br>r |
|---------------|----------|----------|---------------|---------------|
| Reactants (I) | 165.1177 | 165.1203 | 165.1177      | 169.1373      |
| II            | -107.315 | -107.449 | -109.93       | -64.33        |
| TSII → III    | -41.3779 | -43.494  | -45.9751      | 2.630751      |
| III           | -90.2096 | -91.2834 | -93.7645      | -48.3906      |
| TSIII → IV    | -33.9005 | -35.9904 | -38.4715      | 10.84594      |
| IV            | -130.514 | -130.506 | -132.987      | -87.0196      |
| Products (V)  | 106.6846 | 107.1598 | 107.1572      | 108.5145      |

Table 6.7.4: [UH]<sup>+</sup> + C<sub>2</sub>H<sub>3</sub>CN PBE1PBE/SDD/6-311+g(d,p) Singlet Spin Relative Energies (kJ/mol)

| Structure     | E0+E_ZPE | E0+E_tot | E0+H_cor<br>r | E0+G_cor<br>r |
|---------------|----------|----------|---------------|---------------|
| Reactants (I) | 267.1394 | 267.1394 | 267.1394      | 271.1564      |
| II            | -62.29   | -62.3688 | -64.8472      | -19.4129      |
| TSII → III    | -13.6946 | -15.9972 | -18.4756      | 30.89689      |
| III           | -18.0109 | -18.9509 | -21.4293      | 23.10965      |
| TSIII → IV    | -10.3891 | -12.395  | -14.8735      | 33.89783      |
| IV            | -97.6003 | -98.2383 | -100.717      | -52.9248      |
| Products (V)  | 193.3051 | 193.712  | 193.712       | 195.2558      |

Table 6.7.5: [UH]<sup>+</sup> + C<sub>2</sub>H<sub>3</sub>CN B3LYP/SDD/6-311+g(d,p) Triplet Spin Relative Energies (kJ/mol)

| Structure     | E0+E_ZPE | E0+E_tot | E0+H_cor<br>r | E0+G_cor<br>r |
|---------------|----------|----------|---------------|---------------|
| Reactants (I) | 137.1036 | 137.1062 | 137.1036      | 138.4216      |
| II            | -225.685 | -224.921 | -227.402      | -186.962      |
| TSII → III    | -167.895 | -169.652 | -172.13       | -126.641      |
| III           | -221.149 | -222.225 | -224.703      | -181.924      |
| TSIII → IV    | -153.122 | -154.477 | -156.958      | -112.114      |
| IV            | -245.752 | -244.3   | -246.781      | -209.294      |
| Products (V)  | -45.6653 | -45.5708 | -45.5734      | -46.2744      |

Table 6.7.6: [UH]<sup>+</sup> + C<sub>2</sub>H<sub>3</sub>CN PBE1PBE/SDD/6-311+g(d,p) Triplet Spin Relative Energies (kJ/mol)

| Structure     | E0+E_ZPE | E0+E_tot | E0+H_cor<br>r | E0+G_cor<br>r |
|---------------|----------|----------|---------------|---------------|
| Reactants (I) | 144.2844 | 144.2896 | 144.2896      | 145.5         |
| II            | -184.911 | -184.423 | -186.901      | -145.697      |
| TSII → III    | -144.311 | -146.078 | -148.556      | -103.072      |
| III           | -185.373 | -186.413 | -188.892      | -146.687      |
| TSIII → IV    | -134.449 | -136.316 | -138.794      | -91.7166      |
| IV            | -212.274 | -211.363 | -213.842      | -174.58       |

Figure 8:  $[\text{UH}]^+ + \text{C}_2\text{H}_3\text{CN}$  B3LYP/SDD/6-311+g(d,p) Relative Enthalpy (kJ/mol)

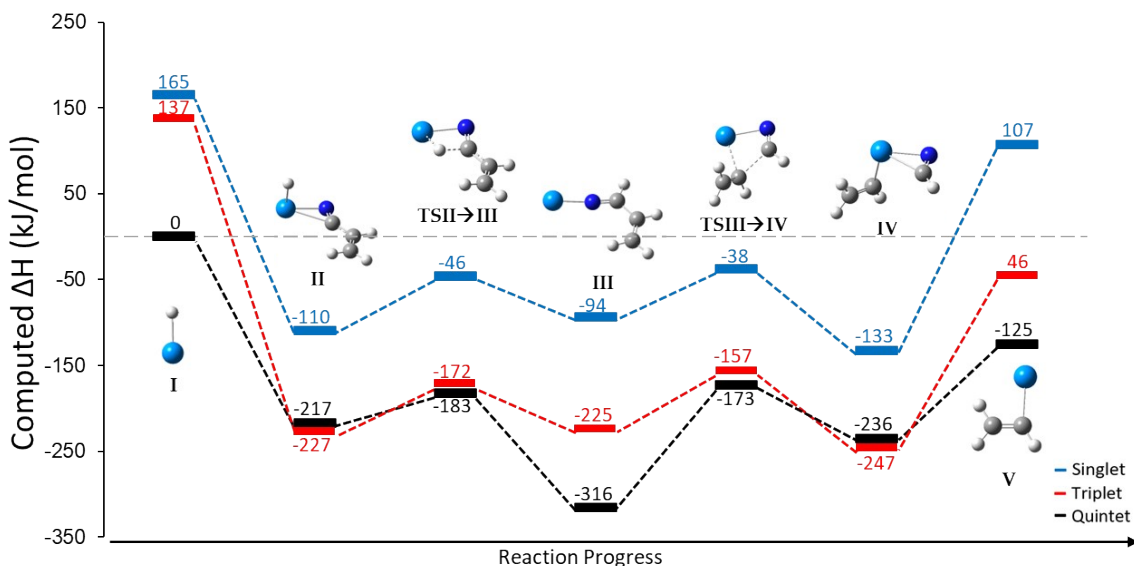

Figure 8.1:  $[\text{UH}]^+ + \text{C}_2\text{H}_3\text{CN}$  PBE1PBE/SDD/6-311+g(d,p) Relative Enthalpy (kJ/mol)

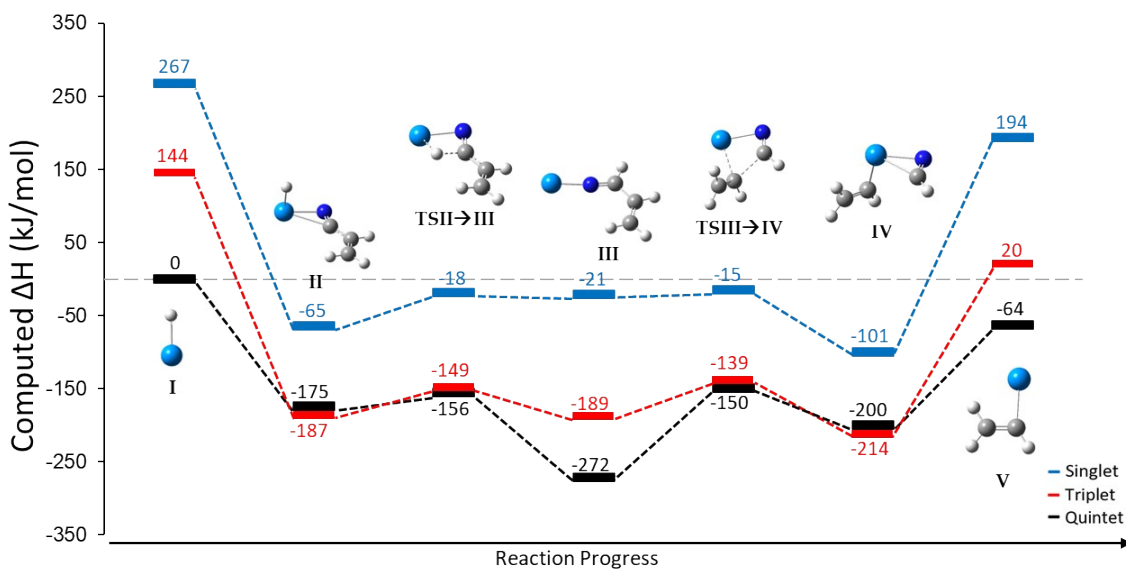

Table 7.1:  $[\text{UCH}_3]^+$  Rearrangement B3LYP/SDD/6-311+g(d,p) Quintet Spin Energies (Hartree)

| Structure                     | E0         | E_ZPE  | E_tot  | H_corr | G_corr  | E0+E_ZPE   | E0+E_tot   | E0+H_corr  | E0+G_corr  |
|-------------------------------|------------|--------|--------|--------|---------|------------|------------|------------|------------|
| $[\text{UHC}_3]^+ (\text{V})$ | -516.58290 | .03202 | .03595 | .03690 | .00328  | -516.55087 | -516.54694 | -516.54600 | -516.57961 |
| TSV→VI                        | -516.51239 | .02468 | .02869 | .02963 | -.00426 | -516.48772 | -516.48371 | -516.48276 | -516.51665 |
| VI                            | -516.52012 | .02520 | .02974 | .03068 | -.00426 | -516.49492 | -516.49039 | -516.48944 | -516.52438 |

|          |            |        |        |        |         |            |            |            |            |
|----------|------------|--------|--------|--------|---------|------------|------------|------------|------------|
| TSVI→VII | -516.42836 | .01992 | .02413 | .02507 | -.00919 | -516.40844 | -516.40423 | -516.40329 | -516.43755 |
| VII      | -516.42859 | .02041 | .02518 | .02612 | -.00917 | -516.40818 | -516.40341 | -516.40247 | -516.43776 |

Table 7.1.1:  $[\text{UCH}_3]^+$  Rearrangement B3LYP/SDD/6-311+g(d,p) Quintet Spin Structure Coordinates

| Structure                            | Coordinates |           |           |           |
|--------------------------------------|-------------|-----------|-----------|-----------|
| [UHC <sub>3</sub> ] <sup>+</sup> (V) | U           | -3.289712 | 1.030298  | -0.450766 |
|                                      | C           | -1.044265 | 0.778059  | -0.038123 |
|                                      | H           | -0.444203 | 1.483373  | -0.634672 |
|                                      | H           | -0.808150 | 0.957408  | 1.022779  |
|                                      | H           | -0.702269 | -0.239348 | -0.285902 |
| TSV→VI                               | U           | -0.270334 | 0.121000  | -0.299332 |
|                                      | C           | 1.897852  | -0.236839 | 0.115856  |
|                                      | H           | 0.831139  | 1.637730  | 0.436111  |
|                                      | H           | 2.352926  | -0.507480 | 1.075369  |
|                                      | H           | 2.688380  | 0.018767  | -0.601536 |
| VI                                   | U           | -0.360956 | -0.059712 | -0.003691 |
|                                      | C           | 1.936823  | 0.159322  | 0.001362  |
|                                      | H           | -0.689602 | 1.911264  | -0.002921 |
|                                      | H           | 2.439713  | 1.133729  | 0.003762  |
|                                      | H           | 2.682963  | -0.643922 | 0.001805  |
| TSVI→VII                             | U           | 0.205380  | 0.064804  | -0.090929 |
|                                      | C           | -2.014593 | -0.145062 | 0.021440  |
|                                      | H           | 0.889730  | -1.038180 | 1.356320  |
|                                      | H           | -3.102041 | -0.157464 | 0.133984  |
|                                      | H           | -0.085697 | 1.685220  | 0.936006  |
| VII                                  | U           | -2.327016 | 2.255848  | 1.004581  |
|                                      | C           | -0.580505 | 1.427792  | -0.127237 |
|                                      | H           | -3.847275 | 2.228291  | -0.208158 |
|                                      | H           | 0.311548  | 1.095721  | -0.665642 |
|                                      | H           | -1.860619 | 4.134110  | 0.837157  |

Table 7.2:  $[\text{UCH}_3]^+$  Rearrangement PBE1PBE/SDD/6-311+g(d,p) Quintet Spin Energies (Hartree)

| Structure                            | E0         | E_ZPE  | E_tot  | H_corr | G_corr  | E0+E_ZPE   | E0+E_tot   | E0+H_corr  | E0+G_corr  |
|--------------------------------------|------------|--------|--------|--------|---------|------------|------------|------------|------------|
| [UHC <sub>3</sub> ] <sup>+</sup> (V) | -516.42679 | .03203 | .03603 | .03698 | .00321  | -516.39477 | -516.39076 | -516.38981 | -516.42358 |
| TSV→VI                               | -516.35731 | .02482 | .02883 | .02978 | -.00412 | -516.33249 | -516.32847 | -516.32753 | -516.36142 |
| VI                                   | -516.36320 | .02537 | .02989 | .03084 | -.00404 | -516.33783 | -516.33331 | -516.33237 | -516.36724 |
| TSVI→VII                             | -516.27018 | .02017 | .02436 | .02531 | -.00890 | -516.25001 | -516.24582 | -516.24488 | -516.27908 |
| VII                                  | -516.27025 | .02062 | .02538 | .02633 | -.00895 | -516.24963 | -516.24487 | -516.24393 | -516.27920 |

Table 7.2.1: [UCH<sub>3</sub>]<sup>+</sup> Rearrangement PBE1PBE/SDD/6-311+g(d,p) Quintet Spin Structure Coordinates

| Structure                            | Coordinates |             |             |             |
|--------------------------------------|-------------|-------------|-------------|-------------|
| [UHC <sub>3</sub> ] <sup>+</sup> (V) | U           | -3.272222   | 1.028329    | -0.447550   |
|                                      | C           | -1.051155   | 0.778843    | -0.039390   |
|                                      | H           | -0.447809   | 1.483494    | -0.635086   |
|                                      | H           | -0.811631   | 0.957714    | 1.021772    |
|                                      | H           | -0.705783   | -0.238591   | -0.286431   |
| TSV→VI                               | U           | -0.255715   | 0.116932    | -0.264047   |
|                                      | C           | 1.911064    | -0.232481   | 0.079102    |
|                                      | H           | 0.787449    | 1.663299    | 0.445181    |
|                                      | H           | 2.312891    | -0.504888   | 1.065426    |
|                                      | H           | 2.744274    | -0.009684   | -0.599194   |
| VI                                   | U           | -0.354574   | -0.049095   | -0.001753   |
|                                      | C           | 1.926607    | 0.124405    | 0.000408    |
|                                      | H           | -0.654472   | 1.920795    | -0.000459   |
|                                      | H           | 2.367873    | 1.132546    | 0.002029    |
|                                      | H           | 2.723507    | -0.627970   | 0.000093    |
| TSVI→VII                             | U           | 0.11293900  | 0.00087500  | -0.03581900 |
|                                      | C           | -2.01208700 | -0.11950900 | 0.04316800  |
|                                      | H           | 1.00988800  | -1.01860600 | 1.34383100  |
|                                      | H           | -3.10708500 | -0.10849500 | 0.07112600  |
|                                      | H           | -0.11087600 | 1.65505300  | 0.93451500  |
| VII                                  | U           | -2.329997   | 2.271675    | 0.997244    |
|                                      | C           | -0.601322   | 1.439833    | -0.115291   |
|                                      | H           | -3.830475   | 2.194294    | -0.218679   |
|                                      | H           | 0.288627    | 1.105388    | -0.657367   |
|                                      | H           | -1.830700   | 4.130573    | 0.834793    |

Table 7.3: [UCH<sub>3</sub>]<sup>+</sup> Rearrangement B3LYP/SDD/6-311+g(d,p) Singlet Spin Energies (Hartree)

| Structure                            | E0         | E_ZPE  | E_tot  | H_corr | G_corr  | E0+E_ZPE   | E0+E_tot   | E0+H_corr  | E0+G_corr  |
|--------------------------------------|------------|--------|--------|--------|---------|------------|------------|------------|------------|
| [UHC <sub>3</sub> ] <sup>+</sup> (V) | -516.49451 | .03174 | .03581 | .03675 | .00439  | -516.46277 | -516.45871 | -516.45776 | -516.49012 |
| TSV→VI                               | -516.46033 | .02608 | .02953 | .03047 | -.00060 | -516.43425 | -516.43080 | -516.42985 | -516.46093 |
| VI                                   | -516.47867 | .02669 | .03049 | .03143 | -.00026 | -516.45197 | -516.44818 | -516.44723 | -516.47892 |
| TSVI→VII                             | -516.41699 | .02100 | .02497 | .02592 | -.00602 | -516.39599 | -516.39202 | -516.39108 | -516.42301 |
| VII                                  | -516.42432 | .02073 | .02569 | .02663 | -.00813 | -516.40360 | -516.39863 | -516.39769 | -516.43245 |

Table 7.3.1: [UCH<sub>3</sub>]<sup>+</sup> Rearrangement B3LYP/SDD/6-311+g(d,p) Singlet Spin Structure Coordinates

| Structure                            | Coordinates |           |           |           |
|--------------------------------------|-------------|-----------|-----------|-----------|
| [UHC <sub>3</sub> ] <sup>+</sup> (V) | U           | -3.253294 | 1.047442  | -0.437384 |
|                                      | C           | -1.044015 | 0.762871  | -0.042847 |
|                                      | H           | -0.472086 | 1.487361  | -0.644763 |
|                                      | H           | -0.837913 | 0.958493  | 1.021838  |
|                                      | H           | -0.681292 | -0.246377 | -0.283530 |
| TSV→VI                               | U           | -0.168782 | -0.022172 | 0.032049  |
|                                      | C           | 1.850745  | -0.068118 | -0.099086 |
|                                      | H           | 1.073854  | 1.473243  | 0.301303  |
|                                      | H           | 1.886670  | -0.492567 | 0.948918  |
|                                      | H           | 2.857476  | 0.142792  | -0.456716 |

|          |   |           |           |           |
|----------|---|-----------|-----------|-----------|
| VI       | U | -0.166444 | -0.021079 | -0.027568 |
|          | C | 1.813022  | -0.058423 | 0.001394  |
|          | H | -0.236947 | 1.932740  | -0.002501 |
|          | H | 1.762938  | 1.079559  | 0.016929  |
|          | H | 2.836373  | -0.432115 | 0.012063  |
| TSVI→VII | U | -0.047424 | -0.238844 | 0.037183  |
|          | C | -1.894364 | -0.034593 | 0.097617  |
|          | H | 1.235936  | -0.926968 | 1.301565  |
|          | H | -2.954917 | 0.204687  | -0.024664 |
|          | H | -0.476124 | 1.363200  | 0.966775  |
| VII      | U | -2.054204 | 2.503468  | 0.302377  |
|          | C | -0.587527 | 1.477407  | -0.196833 |
|          | H | -3.918081 | 2.067617  | 0.038586  |
|          | H | 0.276786  | 0.872319  | -0.490534 |
|          | H | -2.020841 | 4.220952  | 1.187105  |

Table 7.4:  $[\text{UCH}_3]^+$  Rearrangement PBE1PBE/SDD/6-311+g(d,p) Singlet Spin Energies (Hartree)

| Structure                      | E0         | E_ZPE  | E_tot  | H_corr | G_corr  | E0+E_ZPE   | E0+E_tot   | E0+H_corr  | E0+G_corr  |
|--------------------------------|------------|--------|--------|--------|---------|------------|------------|------------|------------|
| $[\text{UHC}_3]^+ \text{ (V)}$ | -516.32691 | .03153 | .03580 | .03674 | .00387  | -516.29538 | -516.29111 | -516.29017 | -516.32304 |
| TSV→VI                         | -516.30114 | .02642 | .02982 | .03076 | -.00018 | -516.27472 | -516.27132 | -516.27038 | -516.30132 |
| VI                             | -516.32105 | .02727 | .03094 | .03189 | .00043  | -516.29378 | -516.29011 | -516.28917 | -516.32062 |
| TSVI→VII                       | -516.25868 | .02134 | .02529 | .02624 | -.00558 | -516.23735 | -516.23339 | -516.23245 | -516.26426 |
| VII                            | -516.26538 | .02112 | .02602 | .02697 | -.00735 | -516.24427 | -516.23936 | -516.23842 | -516.27273 |

Table 7.4.1:  $[\text{UCH}_3]^+$  Rearrangement PBE1PBE/SDD/6-311+g(d,p) Singlet Spin Structure Coordinates

| Structure                      | Coordinates |           |           |           |
|--------------------------------|-------------|-----------|-----------|-----------|
| $[\text{UHC}_3]^+ \text{ (V)}$ | U           | -3.229849 | 1.070378  | -0.424760 |
|                                | C           | -1.051291 | 0.744150  | -0.050543 |
|                                | H           | -0.496983 | 1.487813  | -0.650181 |
|                                | H           | -0.863313 | 0.958928  | 1.016452  |
|                                | H           | -0.647163 | -0.251479 | -0.277653 |
| TSV→VI                         | U           | -0.144523 | -0.029693 | 0.077337  |
|                                | C           | 1.841721  | -0.046066 | -0.113663 |
|                                | H           | 1.094027  | 1.456999  | 0.264581  |
|                                | H           | 1.844518  | -0.514780 | 0.926735  |
|                                | H           | 2.864219  | 0.166717  | -0.428522 |
| VI                             | U           | -0.158534 | -0.021627 | 0.000116  |
|                                | C           | 1.797320  | -0.074316 | 0.000214  |
|                                | H           | -0.162265 | 1.919575  | 0.000483  |
|                                | H           | 1.691996  | 1.071263  | -0.000749 |
|                                | H           | 2.840425  | -0.394214 | 0.000252  |
| TSVI→VII                       | U           | -0.101902 | -0.334237 | 0.129433  |
|                                | C           | -1.902672 | -0.031357 | 0.168578  |
|                                | H           | 1.347701  | -0.836122 | 1.269504  |
|                                | H           | -2.937510 | 0.251984  | -0.052234 |
|                                | H           | -0.512837 | 1.359050  | 0.841539  |
| VII                            | U           | -2.040602 | 2.495685  | 0.296486  |
|                                | C           | -0.594519 | 1.482386  | -0.193966 |
|                                | H           | -3.896870 | 2.089663  | 0.051561  |
|                                | H           | 0.270053  | 0.875880  | -0.488449 |

|  |   |           |          |          |
|--|---|-----------|----------|----------|
|  | H | -2.041928 | 4.198148 | 1.175068 |
|--|---|-----------|----------|----------|

Table 7.5:  $[\text{UHC}_3]^+$  Rearrangement B3LYP/SDD/6-311+g(d,p) Triplet Spin Energies (Hartree)

| Structure                      | E0         | E_ZPE  | E_tot  | H_corr | G_corr  | E0+E_ZPE   | E0+E_tot   | E0+H_corr  | E0+G_corr  |
|--------------------------------|------------|--------|--------|--------|---------|------------|------------|------------|------------|
| $[\text{UHC}_3]^+ \text{ (V)}$ | -516.57310 | .03193 | .03590 | .03684 | .00362  | -516.54117 | -516.53720 | -516.53626 | -516.56948 |
| TSV→VI                         | -516.51350 | .02494 | .02873 | .02967 | -.00313 | -516.48856 | -516.48477 | -516.48383 | -516.51663 |
| VI                             | -516.52597 | .02557 | .02981 | .03075 | -.00284 | -516.50039 | -516.49616 | -516.49522 | -516.52881 |
| TSVI→VII                       | -516.42111 | .01974 | .02395 | .02490 | -.00877 | -516.40137 | -516.39716 | -516.39621 | -516.42988 |
| VII                            | -516.42605 | .02051 | .02526 | .02620 | -.00864 | -516.40554 | -516.40079 | -516.39985 | -516.43469 |

Table 7.5.1:  $[\text{UHC}_3]^+$  Rearrangement B3LYP/SDD/6-311+g(d,p) Triplet Spin Structure Coordinates

| Structure                      | Coordinates |           |           |           |
|--------------------------------|-------------|-----------|-----------|-----------|
| $[\text{UHC}_3]^+ \text{ (V)}$ | U           | -3.286944 | 1.029979  | -0.450263 |
|                                | C           | -1.045147 | 0.778165  | -0.038280 |
|                                | H           | -0.444776 | 1.483636  | -0.634961 |
|                                | H           | -0.808810 | 0.957534  | 1.022921  |
|                                | H           | -0.702923 | -0.239524 | -0.286102 |
| TSV→VI                         | U           | -2.563740 | 1.268775  | 0.189545  |
|                                | C           | -0.734651 | 2.171245  | -0.286428 |
|                                | H           | -0.914745 | 0.947585  | 1.258744  |
|                                | H           | -0.424200 | 1.389429  | -1.025181 |
|                                | H           | 0.075297  | 2.883902  | -0.136682 |
| VI                             | U           | 0.161329  | -0.021252 | -0.020066 |
|                                | C           | -1.835552 | -0.048355 | 0.005404  |
|                                | H           | 0.283091  | 1.940099  | -0.003920 |
|                                | H           | -1.817234 | 1.081224  | 0.016156  |
|                                | H           | -2.840510 | -0.466992 | 0.014839  |
| TSVI→VII                       | U           | 0.157816  | 0.003898  | -0.029103 |
|                                | C           | -1.982450 | -0.104373 | 0.036424  |
|                                | H           | 1.016990  | -1.083713 | 1.346163  |
|                                | H           | -3.073257 | -0.077069 | 0.110456  |
|                                | H           | -0.226320 | 1.670574  | 0.892882  |
| VII                            | U           | -2.130011 | 2.569408  | 0.315691  |
|                                | C           | -0.546502 | 1.418840  | -0.184247 |
|                                | H           | -3.973610 | 2.127795  | -0.174596 |
|                                | H           | 0.313004  | 0.795850  | -0.456746 |
|                                | H           | -1.966748 | 4.229872  | 1.340599  |

Table 7.6:  $[\text{UHC}_3]^+$  Rearrangement PBE1PBE/SDD/6-311+g(d,p) Triplet Spin Energies (Hartree)

| Structure                      | E0         | E_ZPE  | E_tot  | H_corr | G_corr  | E0+E_ZPE   | E0+E_tot   | E0+H_corr  | E0+G_corr  |
|--------------------------------|------------|--------|--------|--------|---------|------------|------------|------------|------------|
| $[\text{UHC}_3]^+ \text{ (V)}$ | -516.41461 | .03195 | .03599 | .03694 | .00357  | -516.38266 | -516.37862 | -516.37767 | -516.41104 |
| TSV→VI                         | -516.35900 | .02535 | .02900 | .02994 | -.00254 | -516.33365 | -516.33001 | -516.32906 | -516.36154 |
| VI                             | -516.37218 | .02676 | .03059 | .03153 | -.00122 | -516.34542 | -516.34159 | -516.34065 | -516.37340 |
| TSVI→VII                       | -516.25938 | .01977 | .02406 | .02501 | -.00879 | -516.23961 | -516.23532 | -516.23438 | -516.26818 |
| VII                            | -516.26592 | .02106 | .02571 | .02666 | -.00790 | -516.24485 | -516.24021 | -516.23926 | -516.27382 |

Table 7.6.1: [UCH<sub>3</sub>]<sup>+</sup> Rearrangement PBE1PBE/SDD/6-311+g(d,p) Triplet Spin Structure Coordinates

| Structure                            | Coordinates |           |           |           |
|--------------------------------------|-------------|-----------|-----------|-----------|
| [UCH <sub>3</sub> ] <sup>+</sup> (V) | U           | -3.269914 | 1.028067  | -0.447124 |
|                                      | C           | -1.051626 | 0.778898  | -0.039478 |
|                                      | H           | -0.448351 | 1.483802  | -0.635412 |
|                                      | H           | -0.812296 | 0.957855  | 1.021974  |
|                                      | H           | -0.706412 | -0.238832 | -0.286646 |
| TSV→VI                               | U           | -2.527167 | 1.246578  | 0.154748  |
|                                      | C           | -0.742572 | 2.195570  | -0.262811 |
|                                      | H           | -0.915747 | 0.957866  | 1.258289  |
|                                      | H           | -0.479470 | 1.386325  | -1.002061 |
|                                      | H           | 0.102918  | 2.874597  | -0.148167 |
| VI                                   | U           | 0.152170  | -0.020985 | -0.020714 |
|                                      | C           | -1.819269 | -0.065765 | 0.005418  |
|                                      | H           | 0.207035  | 1.928960  | -0.003322 |
|                                      | H           | -1.741639 | 1.070773  | 0.014811  |
|                                      | H           | -2.847173 | -0.428261 | 0.016218  |
| TSVI→VII                             | U           | 0.112940  | 0.000875  | -0.035819 |
|                                      | C           | -2.012086 | -0.119509 | 0.043169  |
|                                      | H           | 1.009889  | -1.018607 | 1.343831  |
|                                      | H           | -3.107084 | -0.108494 | 0.071126  |
|                                      | H           | -0.110878 | 1.655054  | 0.934514  |
| VII                                  | U           | -2.125105 | 2.565744  | 0.314828  |
|                                      | C           | -0.567568 | 1.435260  | -0.177545 |
|                                      | H           | -3.948111 | 2.121109  | -0.175708 |
|                                      | H           | 0.292197  | 0.809831  | -0.450549 |
|                                      | H           | -1.955281 | 4.209820  | 1.329676  |

Table 7.7.1: [UCH<sub>3</sub>]<sup>+</sup> Rearrangement B3LYP/SDD/6-311+g(d,p) Quintet Spin Relative Energies (kJ/mol)

| Structure                            | EO+E_ZPE | EO+E_tot | EO+H_cor<br>r | EO+G_cor<br>r |
|--------------------------------------|----------|----------|---------------|---------------|
| [UCH <sub>3</sub> ] <sup>+</sup> (V) | -107.903 | -106.598 | -106.601      | -111.004      |
| TSV→VI                               | 57.916   | 59.423   | 59.420        | 54.303        |
| VI                                   | 38.991   | 41.890   | 41.887        | 33.998        |
| TSVI→VII                             | 266.063  | 268.092  | 268.090       | 261.988       |
| VII                                  | 266.743  | 270.245  | 270.243       | 261.434       |

Table 7.7.2: [UCH<sub>3</sub>]<sup>+</sup> Rearrangement PBE1PBE/SDD/6-311+g(d,p) Quintet Spin Relative Energies (kJ/mol)

| Structure                            | EO+E_ZPE | EO+E_tot | EO+H_cor<br>r | EO+G_cor<br>r |
|--------------------------------------|----------|----------|---------------|---------------|
| [UCH <sub>3</sub> ] <sup>+</sup> (V) | -37.715  | -36.187  | -36.187       | -41.063       |
| TSV→VI                               | 125.790  | 127.342  | 127.345       | 122.136       |
| VI                                   | 111.762  | 114.635  | 114.635       | 106.853       |
| TSVI→VII                             | 342.355  | 344.350  | 344.350       | 338.327       |
| VII                                  | 343.331  | 346.839  | 346.842       | 338.007       |

Table 7.7.3: [UHC<sub>3</sub>]<sup>+</sup> Rearrangement B3LYP/SDD/6-311+g(d,p) Singlet Spin Relative Energies (kJ/mol)

| Structure                            | E0+E_ZPE | E0+E_tot | E0+H_cor<br>r | E0+G_cor<br>r |
|--------------------------------------|----------|----------|---------------|---------------|
| [UHC <sub>3</sub> ] <sup>+</sup> (V) | 123.409  | 125.063  | 125.060       | 123.958       |
| TSV→VI                               | 198.294  | 198.338  | 198.336       | 200.609       |
| VI                                   | 151.759  | 152.710  | 152.707       | 153.363       |
| TSVI→VII                             | 298.732  | 300.147  | 300.145       | 300.145       |
| VII                                  | 278.776  | 282.782  | 282.782       | 275.360       |

Table 7.7.4: [UHC<sub>3</sub>]<sup>+</sup> Rearrangement PBE1PBE/SDD/6-311+g(d,p) Singlet Spin Relative Energies (kJ/mol)

| Structure                            | E0+E_ZPE | E0+E_tot | E0+H_cor<br>r | E0+G_cor<br>r |
|--------------------------------------|----------|----------|---------------|---------------|
| [UHC <sub>3</sub> ] <sup>+</sup> (V) | 223.223  | 225.433  | 225.433       | 222.900       |
| TSV→VI                               | 277.481  | 277.400  | 277.400       | 279.944       |
| VI                                   | 227.421  | 228.056  | 228.056       | 229.261       |
| TSVI→VII                             | 375.596  | 376.980  | 376.980       | 377.229       |
| VII                                  | 357.417  | 361.308  | 361.308       | 354.991       |

Table 7.7.5: [UHC<sub>3</sub>]<sup>+</sup> Rearrangement B3LYP/SDD/6-311+g(d,p) Triplet Spin Relative Energies (kJ/mol)

| Structure                            | E0+E_ZPE | E0+E_tot | E0+H_cor<br>r | E0+G_cor<br>r |
|--------------------------------------|----------|----------|---------------|---------------|
| [UHC <sub>3</sub> ] <sup>+</sup> (V) | -82.438  | -81.026  | -81.028       | -84.389       |
| TSV→VI                               | 55.700   | 56.622   | 56.619        | 54.364        |
| VI                                   | 24.630   | 26.722   | 26.720        | 22.377        |
| TSVI→VII                             | 284.630  | 286.663  | 286.663       | 282.115       |
| VII                                  | 273.672  | 277.124  | 277.122       | 269.492       |

Table 7.7.6: [UHC<sub>3</sub>]<sup>+</sup> Rearrangement PBE1PBE/SDD/6-311+g(d,p) Triplet Spin Relative Energies (kJ/mol)

| Structure                            | E0+E_ZPE | E0+E_tot | E0+H_cor<br>r | E0+G_cor<br>r |
|--------------------------------------|----------|----------|---------------|---------------|
| [UHC <sub>3</sub> ] <sup>+</sup> (V) | -5.939   | -4.314   | -4.314        | -8.142        |
| TSV→VI                               | 122.747  | 123.317  | 123.317       | 121.818       |
| VI                                   | 91.850   | 92.893   | 92.893        | 90.687        |
| TSVI→VII                             | 369.642  | 371.915  | 371.915       | 366.953       |
| VII                                  | 355.887  | 359.090  | 359.090       | 352.145       |

Figure 9.1:  $[\text{UCH}_3]^+$  Rearrangement B3LYP/SDD/6-311+g(d,p) Relative Enthalpy (kJ/mol)

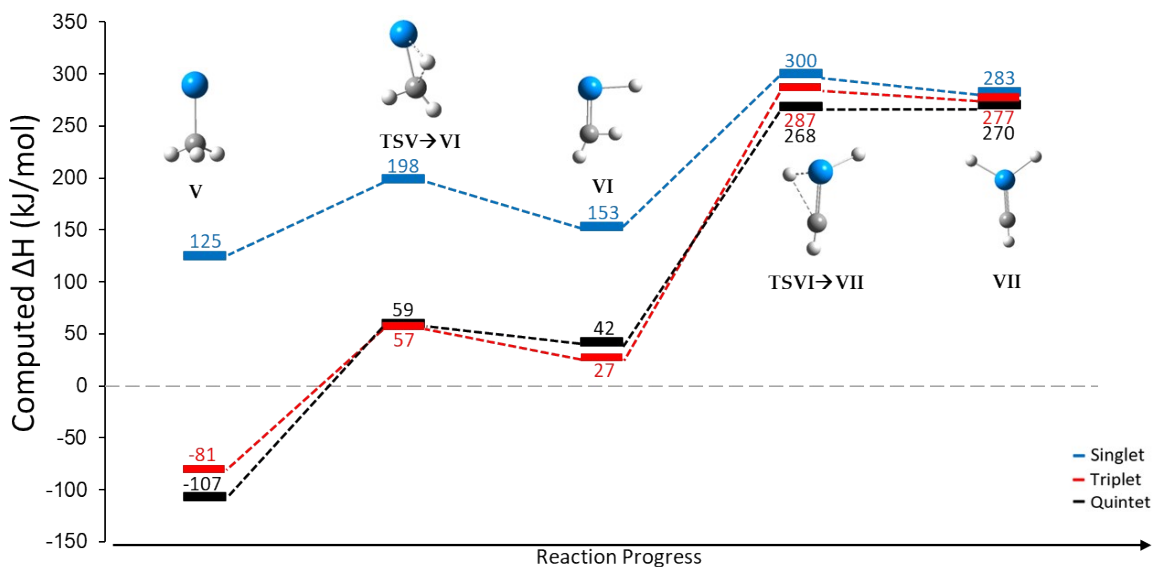

Figure 9.2:  $[\text{UCH}_3]^+$  Rearrangement PBE1PBE/SDD/6-311+g(d,p) Relative Enthalpy (kJ/mol)

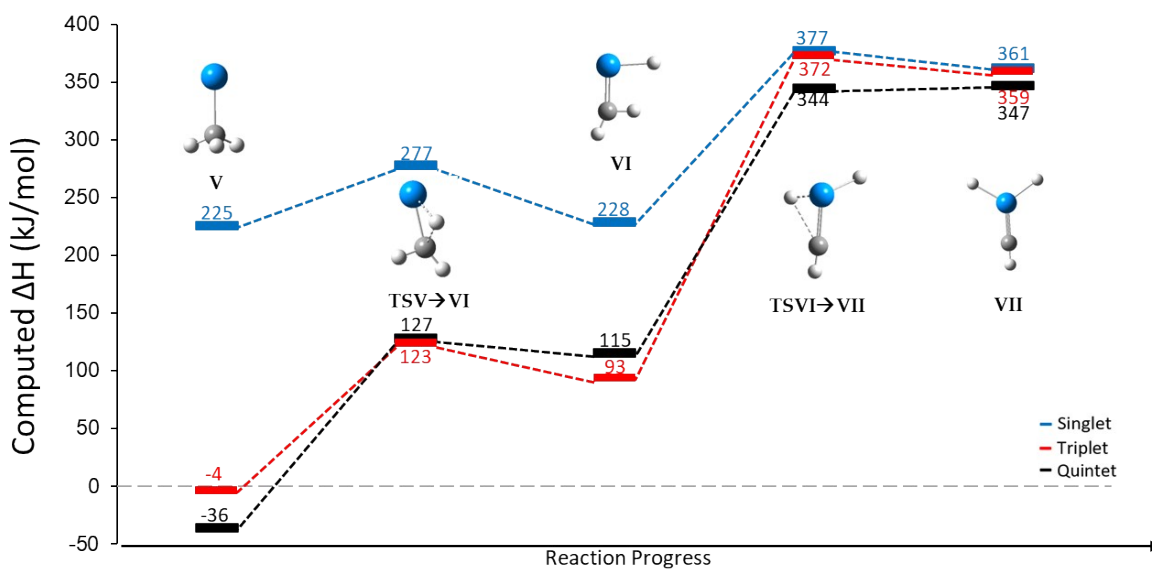

Table 8.1:  $[\text{UCH}_3]^+$  Dissociation B3LYP/SDD/6-311+g(d,p) Quintet Spin Energies (Hartree)

| Structure                                                         | E0         | E_ZPE   | E_tot   | H_corr  | G_corr  | E0+E_ZPE   | E0+E_tot   | E0+H_corr  | E0+G_corr  |
|-------------------------------------------------------------------|------------|---------|---------|---------|---------|------------|------------|------------|------------|
| [UHC <sub>3</sub> ] <sup>+</sup> (V)                              | -516.58290 | .03202  | .03595  | .03690  | .00328  | -516.55087 | -516.54694 | -516.54600 | -516.57961 |
| TSV→VI                                                            | -516.51239 | .02468  | .02869  | .02963  | -.00426 | -516.48772 | -516.48371 | -516.48276 | -516.51665 |
| VI                                                                | -516.52012 | .02520  | .02974  | .03068  | -.00426 | -516.49492 | -516.49039 | -516.48944 | -516.52438 |
| TSVI→VII                                                          | -516.42836 | .01992  | .02413  | .02507  | -.00919 | -516.40844 | -516.40423 | -516.40329 | -516.43755 |
| VII                                                               | -516.42859 | .02041  | .02518  | .02612  | -.00917 | -516.40818 | -516.40341 | -516.40247 | -516.43776 |
| H (2)                                                             | -.50216    | .00000  | .00142  | .00236  | -.01065 | -.50216    | -.50074    | -.49980    | -.51281    |
| [UCH <sub>2</sub> ] <sup>+</sup> (4)                              | -515.93826 | .02094  | .02420  | .02515  | -.00645 | -515.91732 | -515.91406 | -515.91311 | -515.94470 |
| H + [UCH <sub>2</sub> ] <sup>+</sup> (VIII)                       | -516.44041 | .02094  | .02562  | .02751  | -.01710 | -516.41947 | -516.41480 | -516.41291 | -516.45751 |
| H-UCH <sub>2</sub> <sup>+</sup> BDE                               | .07971     | -.00426 | -.00412 | -.00318 | -.01284 | .07545     | .07559     | .07653     | .06687     |
| TSVI→IX                                                           | -516.47684 | .02373  | .02709  | .02804  | -.00471 | -516.45312 | -516.44975 | -516.44881 | -516.48156 |
| IX                                                                | -516.47739 | .02569  | .02962  | .03056  | -.00325 | -516.45170 | -516.44777 | -516.44683 | -516.48064 |
| [UCH] <sup>+</sup>                                                | -1.17957   | .01007  | .01243  | .01337  | -.00142 | -1.16950   | -1.16714   | -1.16620   | -1.18099   |
| H <sub>2</sub>                                                    | -515.27769 | .01001  | .01316  | .01410  | -.01365 | -515.26768 | -515.26454 | -515.26359 | -515.29134 |
| H <sub>2</sub> + [UCH] <sup>+</sup> (X)                           | -516.45726 | .02008  | .02558  | .02747  | -.01507 | -516.43719 | -516.43168 | -516.42979 | -516.47233 |
| <sup>4</sup> I 5f <sup>3</sup> 7s <sup>2</sup> U <sup>+</sup> (4) | -476.62730 | .00000  | .00142  | .00236  | -.01905 | -476.62730 | -476.62588 | -476.62494 | -476.64635 |
| CH <sub>3</sub> (2)                                               | -39.85517  | .02963  | .03268  | .03362  | .01154  | -39.82554  | -39.82249  | -39.82155  | -39.84363  |
| U <sup>+</sup> + CH <sub>3</sub> (XI)                             | -516.48246 | .02963  | .03409  | .03598  | -.00751 | -516.45283 | -516.44837 | -516.44648 | -516.48997 |
| U <sup>+</sup> -CH <sub>3</sub> BDE                               | .10043     | -.00239 | -.00186 | -.00092 | -.01079 | .09804     | .09857     | .09951     | .08964     |

Table 8.1.1: [UCH<sub>3</sub>]<sup>+</sup> Dissociation B3LYP/SDD/6-311+g(d,p) Quintet Spin Structure Coordinates

| Structure                            | Coordinates |           |           |           |
|--------------------------------------|-------------|-----------|-----------|-----------|
| [UHC <sub>3</sub> ] <sup>+</sup> (V) | U           | -3.289712 | 1.030298  | -0.450766 |
|                                      | C           | -1.044265 | 0.778059  | -0.038123 |
|                                      | H           | -0.444203 | 1.483373  | -0.634672 |
|                                      | H           | -0.808150 | 0.957408  | 1.022779  |
|                                      | H           | -0.702269 | -0.239348 | -0.285902 |
| TSV→VI                               | U           | -0.270334 | 0.121000  | -0.299332 |
|                                      | C           | 1.897852  | -0.236839 | 0.115856  |
|                                      | H           | 0.831139  | 1.637730  | 0.436111  |
|                                      | H           | 2.352926  | -0.507480 | 1.075369  |
|                                      | H           | 2.688380  | 0.018767  | -0.601536 |
| VI                                   | U           | -0.360956 | -0.059712 | -0.003691 |
|                                      | C           | 1.936823  | 0.159322  | 0.001362  |
|                                      | H           | -0.689602 | 1.911264  | -0.002921 |
|                                      | H           | 2.439713  | 1.133729  | 0.003762  |
|                                      | H           | 2.682963  | -0.643922 | 0.001805  |
| TSVI→VII                             | U           | 0.205380  | 0.064804  | -0.090929 |
|                                      | C           | -2.014593 | -0.145062 | 0.021440  |
|                                      | H           | 0.889730  | -1.038180 | 1.356320  |
|                                      | H           | -3.102041 | -0.157464 | 0.133984  |
|                                      | H           | -0.085697 | 1.685220  | 0.936006  |
| VII                                  | U           | -2.327016 | 2.255848  | 1.004581  |
|                                      | C           | -0.580505 | 1.427792  | -0.127237 |
|                                      | H           | -3.847275 | 2.228291  | -0.208158 |

|                                         |   |           |           |           |
|-----------------------------------------|---|-----------|-----------|-----------|
|                                         | H | 0.311548  | 1.095721  | -0.665642 |
|                                         | H | -1.860619 | 4.134110  | 0.837157  |
| [UCH <sub>2</sub> ] <sup>+</sup> (VIII) | U | -0.048167 | -0.534393 | -0.307877 |
|                                         | C | 1.680058  | 0.434748  | 0.076897  |
|                                         | H | 2.396246  | 1.219843  | 0.320945  |
|                                         | H | 2.214029  | -0.550173 | -0.089784 |
| TSVI → IX                               | U | -0.310566 | -0.126750 | 0.061681  |
|                                         | C | 1.794779  | -0.297302 | 0.006525  |
|                                         | H | 1.196640  | 1.342078  | -0.024393 |
|                                         | H | 2.886442  | -0.306775 | -0.024232 |
|                                         | H | 0.441646  | 1.889430  | -0.019263 |
| IX                                      | U | -0.160180 | 0.150355  | -0.032018 |
|                                         | H | 1.456954  | 1.468263  | -0.969784 |
|                                         | C | -0.172413 | -0.660772 | -1.953259 |
|                                         | H | -0.159226 | -1.070737 | -2.965810 |
|                                         | H | 1.225682  | 0.972729  | -1.574198 |
| [UCH] <sup>+</sup> (X)                  | U | -0.003076 | 0.000898  | 0.290262  |
|                                         | C | 0.008610  | -0.002512 | -1.773316 |
|                                         | H | -0.005534 | 0.001615  | -2.864596 |

Table 8.2: [UCH<sub>3</sub>]<sup>+</sup> Dissociation PBE1PBE/SDD/6-311+g(d,p) Quintet Spin Energies (Hartree)

| Structure                                                         | E0         | E_ZPE   | E_tot   | H_corr  | G_corr  | E0+E_ZPE   | E0+E_tot   | E0+H_corr  | E0+G_corr  |
|-------------------------------------------------------------------|------------|---------|---------|---------|---------|------------|------------|------------|------------|
| [UHC <sub>3</sub> ] <sup>+</sup> (V)                              | -516.58290 | .03202  | .03595  | .03690  | .00328  | -516.55087 | -516.54694 | -516.54600 | -516.57961 |
| TSV → VI                                                          | -516.51239 | .02468  | .02869  | .02963  | -.00426 | -516.48772 | -516.48371 | -516.48276 | -516.51665 |
| VI                                                                | -516.52012 | .02520  | .02974  | .03068  | -.00426 | -516.49492 | -516.49039 | -516.48944 | -516.52438 |
| TSVI → VII                                                        | -516.42836 | .01992  | .02413  | .02507  | -.00919 | -516.40844 | -516.40423 | -516.40329 | -516.43755 |
| VII                                                               | -516.42859 | .02041  | .02518  | .02612  | -.00917 | -516.40818 | -516.40341 | -516.40247 | -516.43776 |
| H (2)                                                             | -.50104    | .00000  | .00142  | .00236  | -.01065 | -.50104    | -.49962    | -.49868    | -.51169    |
| [UCH <sub>2</sub> ] <sup>+</sup> (4)                              | -515.78116 | .02113  | .02437  | .02532  | -.00624 | -515.76004 | -515.75679 | -515.75585 | -515.78740 |
| H + [UCH <sub>2</sub> ] <sup>+</sup> (VIII)                       | -516.28220 | .02113  | .02579  | .02768  | -.01689 | -516.26107 | -516.25641 | -516.25452 | -516.29909 |
| H-UCH <sub>2</sub> <sup>+</sup> BDE                               | .08100     | -.00424 | -.00410 | -.00316 | -.01285 | .07676     | .07690     | .07785     | .06815     |
| TSVI → IX                                                         | -516.32471 | .02389  | .02727  | .02821  | -.00456 | -516.30082 | -516.29744 | -516.29650 | -516.32926 |
| IX                                                                | -516.32328 | .02598  | .02994  | .03089  | -.00295 | -516.29730 | -516.29334 | -516.29240 | -516.32623 |
| [UCH] <sup>+</sup>                                                | -1.16816   | .01005  | .01241  | .01336  | -.00144 | -1.15811   | -1.15575   | -1.15480   | -1.16960   |
| H <sub>2</sub>                                                    | -515.13071 | .01009  | .01324  | .01418  | -.01348 | -515.12062 | -515.11747 | -515.11653 | -515.14419 |
| H <sub>2</sub> + [UCH] <sup>+</sup> (X)                           | -516.29887 | .02014  | .02565  | .02754  | -.01492 | -516.27872 | -516.27322 | -516.27133 | -516.31379 |
| <sup>4</sup> I 5f <sup>3</sup> 7s <sup>2</sup> U <sup>+</sup> (4) | -476.51684 | .00000  | .00142  | .00236  | -.01905 | -476.51685 | -476.51543 | -476.51448 | -476.53589 |
| CH <sub>3</sub> (2)                                               | -39.79550  | .02974  | .03280  | .03374  | .01165  | -39.76575  | -39.76270  | -39.76176  | -39.78385  |
| U <sup>+</sup> + CH <sub>3</sub> (XI)                             | -516.31234 | .02974  | .03421  | .03610  | -.00740 | -516.28260 | -516.27813 | -516.27624 | -516.31974 |
| U <sup>+</sup> -CH <sub>3</sub> BDE                               | .11445     | -.00228 | -.00182 | -.00088 | -.01061 | .11217     | .11263     | .11357     | .10384     |

Table 8.2.1: [UCH<sub>3</sub>]<sup>+</sup> Rearrangement PBE1PBE/SDD/6-311+g(d,p) Quintet Spin Structure Coordinates

| Structure                            | Coordinates |           |           |           |
|--------------------------------------|-------------|-----------|-----------|-----------|
| [UHC <sub>3</sub> ] <sup>+</sup> (V) | U           | -3.272222 | 1.028329  | -0.447550 |
|                                      | C           | -1.051155 | 0.778843  | -0.039390 |
|                                      | H           | -0.447809 | 1.483494  | -0.635086 |
|                                      | H           | -0.811631 | 0.957714  | 1.021772  |
|                                      | H           | -0.705783 | -0.238591 | -0.286431 |

|                                         |   |             |             |             |
|-----------------------------------------|---|-------------|-------------|-------------|
| TSV→VI                                  | U | -0.255715   | 0.116932    | -0.264047   |
|                                         | C | 1.911064    | -0.232481   | 0.079102    |
|                                         | H | 0.787449    | 1.663299    | 0.445181    |
|                                         | H | 2.312891    | -0.504888   | 1.065426    |
|                                         | H | 2.744274    | -0.009684   | -0.599194   |
| VI                                      | U | -0.354574   | -0.049095   | -0.001753   |
|                                         | C | 1.926607    | 0.124405    | 0.000408    |
|                                         | H | -0.654472   | 1.920795    | -0.000459   |
|                                         | H | 2.367873    | 1.132546    | 0.002029    |
|                                         | H | 2.723507    | -0.627970   | 0.000093    |
| TSVI→VII                                | U | 0.11293900  | 0.00087500  | -0.03581900 |
|                                         | C | -2.01208700 | -0.11950900 | 0.04316800  |
|                                         | H | 1.00988800  | -1.01860600 | 1.34383100  |
|                                         | H | -3.10708500 | -0.10849500 | 0.07112600  |
|                                         | H | -0.11087600 | 1.65505300  | 0.93451500  |
| VII                                     | U | -2.329997   | 2.271675    | 0.997244    |
|                                         | C | -0.601322   | 1.439833    | -0.115291   |
|                                         | H | -3.830475   | 2.194294    | -0.218679   |
|                                         | H | 0.288627    | 1.105388    | -0.657367   |
|                                         | H | -1.830700   | 4.130573    | 0.834793    |
| [UCH <sub>2</sub> ] <sup>+</sup> (VIII) | U | -0.048167   | -0.534393   | -0.307877   |
|                                         | C | 1.680058    | 0.434748    | 0.076897    |
|                                         | H | 2.396246    | 1.219843    | 0.320945    |
|                                         | H | 2.214029    | -0.550173   | -0.089784   |
| TSVI→IX                                 | U | -0.310566   | -0.126750   | 0.061681    |
|                                         | C | 1.794779    | -0.297302   | 0.006525    |
|                                         | H | 0.441646    | 1.889430    | -0.019263   |
|                                         | H | 1.196640    | 1.342078    | -0.024393   |
|                                         | H | 2.886442    | -0.306775   | -0.024232   |
| IX                                      | U | -0.160180   | 0.150355    | -0.032018   |
|                                         | H | 1.456954    | 1.468263    | -0.969784   |
|                                         | C | -0.172413   | -0.660772   | -1.953259   |
|                                         | H | -0.159226   | -1.070737   | -2.965810   |
|                                         | H | 1.225682    | 0.972729    | -1.574198   |
| [UCH] <sup>+</sup> (X)                  | U | -0.002836   | 0.000828    | 0.279490    |
|                                         | C | 0.007984    | -0.002329   | -1.767013   |
|                                         | H | -0.005148   | 0.001502    | -2.860127   |

Table 8.3: [UCH<sub>3</sub>]<sup>+</sup> Dissociation B3LYP/SDD/6-311+g(d,p) Singlet Spin Energies (Hartree)

| Structure                                   | E0         | E_ZPE   | E_tot   | H_corr  | G_corr  | E0+E_ZPE   | E0+E_tot   | E0+H_corr  | E0+G_corr  |
|---------------------------------------------|------------|---------|---------|---------|---------|------------|------------|------------|------------|
| [UHC <sub>3</sub> ] <sup>+</sup> (V)        | -516.58290 | .03202  | .03595  | .03690  | .00328  | -516.55087 | -516.54694 | -516.54600 | -516.57961 |
| TSV→VI                                      | -516.51239 | .02468  | .02869  | .02963  | -.00426 | -516.48772 | -516.48371 | -516.48276 | -516.51665 |
| VI                                          | -516.52012 | .02520  | .02974  | .03068  | -.00426 | -516.49492 | -516.49039 | -516.48944 | -516.52438 |
| TSVI→VII                                    | -516.42836 | .01992  | .02413  | .02507  | -.00919 | -516.40844 | -516.40423 | -516.40329 | -516.43755 |
| VII                                         | -516.42859 | .02041  | .02518  | .02612  | -.00917 | -516.40818 | -516.40341 | -516.40247 | -516.43776 |
| H (2)                                       | -.50216    | .00000  | .00142  | .00236  | -.01065 | -.50216    | -.50074    | -.49980    | -.51281    |
| [UCH <sub>2</sub> ] <sup>+</sup> (2)        | -515.91385 | .02081  | .02408  | .02503  | -.00590 | -515.89304 | -515.88977 | -515.88883 | -515.91975 |
| H + [UCH <sub>2</sub> ] <sup>+</sup> (VIII) | -516.41601 | .02081  | .02550  | .02739  | -.01656 | -516.39520 | -516.39051 | -516.38862 | -516.43256 |
| H-UCH <sub>2</sub> <sup>+</sup> BDE         | .06266     | -.00588 | -.00499 | -.00405 | -.01630 | .05678     | .05767     | .05861     | .04636     |
| TSVI→IX                                     | -516.42995 | .02335  | .02674  | .02769  | -.00358 | -516.40661 | -516.40321 | -516.40227 | -516.43353 |
| IX                                          | -516.44701 | .02577  | .02966  | .03060  | -.00139 | -516.42125 | -516.41736 | -516.41641 | -516.44841 |
| [UCH] <sup>+</sup>                          | -1.17957   | .01007  | .01243  | .01337  | -.00142 | -1.16950   | -1.16714   | -1.16620   | -1.18099   |
| H <sub>2</sub>                              | -515.23631 | .01202  | .01474  | .01569  | -.01194 | -515.22429 | -515.22157 | -515.22063 | -515.24825 |

|                                                    |            |         |         |         |         |            |            |            |            |
|----------------------------------------------------|------------|---------|---------|---------|---------|------------|------------|------------|------------|
| H <sub>2</sub> + [UCH] <sup>+</sup> (X)            | -516.41588 | .02209  | .02717  | .02906  | -.01336 | -516.39380 | -516.38872 | -516.38683 | -516.42924 |
| 5f <sup>3</sup> 7s <sup>2</sup> U <sup>+</sup> (2) | -476.56467 | .00000  | .00142  | .00236  | -.01839 | -476.56467 | -476.56325 | -476.56231 | -476.58306 |
| CH <sub>3</sub> (2)                                | -39.85517  | .02963  | .03268  | .03362  | .01154  | -39.82554  | -39.82249  | -39.82155  | -39.84363  |
| U <sup>+</sup> + CH <sub>3</sub> (XI)              | -516.41984 | .02963  | .03409  | .03598  | -.00685 | -516.39020 | -516.38574 | -516.38386 | -516.42669 |
| U <sup>+</sup> -CH <sub>3</sub> BDE                | .07467     | -.00211 | -.00171 | -.00077 | -.01124 | .07257     | .07296     | .07391     | .06343     |

Table 8.3.1: [UCH<sub>3</sub>]<sup>+</sup> Dissociation B3LYP/SDD/6-311+g(d,p) Singlet Spin Structure Coordinates

| Structure                               | Coordinates |           |           |           |
|-----------------------------------------|-------------|-----------|-----------|-----------|
| [UHC <sub>3</sub> ] <sup>+</sup> (V)    | U           | -3.253294 | 1.047442  | -0.437384 |
|                                         | C           | -1.044015 | 0.762871  | -0.042847 |
|                                         | H           | -0.472086 | 1.487361  | -0.644763 |
|                                         | H           | -0.837913 | 0.958493  | 1.021838  |
|                                         | H           | -0.681292 | -0.246377 | -0.283530 |
| TSV→VI                                  | U           | -0.168782 | -0.022172 | 0.032049  |
|                                         | C           | 1.850745  | -0.068118 | -0.099086 |
|                                         | H           | 1.073854  | 1.473243  | 0.301303  |
|                                         | H           | 1.886670  | -0.492567 | 0.948918  |
|                                         | H           | 2.857476  | 0.142792  | -0.456716 |
| VI                                      | U           | -0.166444 | -0.021079 | -0.027568 |
|                                         | C           | 1.813022  | -0.058423 | 0.001394  |
|                                         | H           | -0.236947 | 1.932740  | -0.002501 |
|                                         | H           | 1.762938  | 1.079559  | 0.016929  |
|                                         | H           | 2.836373  | -0.432115 | 0.012063  |
| TSVI→VII                                | U           | -0.047424 | -0.238844 | 0.037183  |
|                                         | C           | -1.894364 | -0.034593 | 0.097617  |
|                                         | H           | 1.235936  | -0.926968 | 1.301565  |
|                                         | H           | -2.954917 | 0.204687  | -0.024664 |
|                                         | H           | -0.476124 | 1.363200  | 0.966775  |
| VII                                     | U           | -2.054204 | 2.503468  | 0.302377  |
|                                         | C           | -0.587527 | 1.477407  | -0.196833 |
|                                         | H           | -3.918081 | 2.067617  | 0.038586  |
|                                         | H           | 0.276786  | 0.872319  | -0.490534 |
|                                         | H           | -2.020841 | 4.220952  | 1.187105  |
| [UCH <sub>2</sub> ] <sup>+</sup> (VIII) | U           | -0.038234 | -0.529051 | -0.305513 |
|                                         | C           | 1.681708  | 0.432800  | 0.075898  |
|                                         | H           | 2.389871  | 1.222269  | 0.320892  |
|                                         | H           | 2.208820  | -0.555992 | -0.091097 |
| TSVI→IX                                 | U           | -0.204757 | -0.127640 | 0.032447  |
|                                         | C           | 1.716342  | -0.162842 | 0.049762  |
|                                         | H           | 0.413581  | 1.848992  | 0.001060  |
|                                         | H           | 1.292447  | 1.255696  | -0.041738 |
|                                         | H           | 2.791327  | -0.313525 | -0.041213 |
| IX                                      | U           | -2.063659 | 0.725809  | 0.197760  |
|                                         | C           | -1.530068 | 2.364932  | -0.630669 |
|                                         | H           | -1.636237 | 2.577024  | 0.785642  |
|                                         | H           | -1.184307 | 3.275558  | -1.135105 |
|                                         | H           | -1.889596 | 2.176341  | 1.565273  |
| [UCH] <sup>+</sup> (X)                  | U           | -0.000000 | 0.000000  | 0.143174  |
|                                         | C           | 0.000000  | -0.000000 | -1.725919 |
|                                         | H           | 0.000000  | -0.000000 | -2.816462 |

Table 8.4:  $[\text{UCH}_3]^+$  Dissociation PBE1PBE/SDD/6-311+g(d,p) Singlet Spin Energies (Hartree)

| Structure                                          | E0         | E_ZPE   | E_tot   | H_corr  | G_corr  | E0+E_ZPE   | E0+E_tot   | E0+H_corr  | E0+G_corr  |
|----------------------------------------------------|------------|---------|---------|---------|---------|------------|------------|------------|------------|
| $[\text{UHC}_3]^+ \text{ (V)}$                     | -516.58290 | .03202  | .03595  | .03690  | .00328  | -516.55087 | -516.54694 | -516.54600 | -516.57961 |
| TSV→VI                                             | -516.51239 | .02468  | .02869  | .02963  | -.00426 | -516.48772 | -516.48371 | -516.48276 | -516.51665 |
| VI                                                 | -516.52012 | .02520  | .02974  | .03068  | -.00426 | -516.49492 | -516.49039 | -516.48944 | -516.52438 |
| TSVI→VII                                           | -516.42836 | .01992  | .02413  | .02507  | -.00919 | -516.40844 | -516.40423 | -516.40329 | -516.43755 |
| VII                                                | -516.42859 | .02041  | .02518  | .02612  | -.00917 | -516.40818 | -516.40341 | -516.40247 | -516.43776 |
| H (2)                                              | -.50104    | .00000  | .00142  | .00236  | -.01065 | -.50104    | -.49962    | -.49868    | -.51169    |
| $[\text{UCH}_2]^+ \text{ (2)}$                     | -515.76260 | .02120  | .02441  | .02536  | -.00548 | -515.74140 | -515.73818 | -515.73724 | -515.76807 |
| H + $[\text{UCH}_2]^+ \text{ (VIII)}$              | -516.26363 | .02120  | .02583  | .02772  | -.01613 | -516.24243 | -516.23781 | -516.23592 | -516.27977 |
| H- $\text{UCH}_2^+$ BDE                            | .05742     | -.00607 | -.00511 | -.00417 | -.01656 | .05135     | .05231     | .05325     | .04085     |
| TSVI→IX                                            | -516.26923 | .02344  | .02684  | .02778  | -.00349 | -516.24579 | -516.24239 | -516.24144 | -516.27271 |
| IX                                                 | -516.29268 | .02654  | .03013  | .03107  | -.00022 | -516.26614 | -516.26256 | -516.26161 | -516.29290 |
| $[\text{UCH}]^+$                                   | -1.16816   | .01005  | .01241  | .01336  | -.00144 | -1.15811   | -1.15575   | -1.15480   | -1.16960   |
| H <sub>2</sub>                                     | -515.09093 | .01233  | .01501  | .01595  | -.01158 | -515.07860 | -515.07592 | -515.07498 | -515.10251 |
| H <sub>2</sub> + $[\text{UCH}]^+ \text{ (X)}$      | -516.25908 | .02238  | .02742  | .02931  | -.01302 | -516.23670 | -516.23167 | -516.22978 | -516.27211 |
| 5f <sup>3</sup> 7s <sup>2</sup> U <sup>+</sup> (2) | -476.44907 | .00000  | .00142  | .00236  | -.01839 | -476.44907 | -476.44765 | -476.44671 | -476.46746 |
| CH <sub>3</sub> (2)                                | -39.79550  | .02974  | .03280  | .03374  | .01165  | -39.76575  | -39.76270  | -39.76176  | -39.78385  |
| U <sup>+</sup> + CH <sub>3</sub> (XI)              | -516.24456 | .02974  | .03421  | .03610  | -.00675 | -516.21482 | -516.21035 | -516.20846 | -516.25131 |
| U <sup>+</sup> -CH <sub>3</sub> BDE                | .08235     | -.00179 | -.00159 | -.00064 | -.01062 | .08056     | .08076     | .08171     | .07173     |

Table 8.4.1:  $[\text{UCH}_3]^+$  Dissociation PBE1PBE/SDD/6-311+g(d,p) Singlet Spin Structure Coordinates

| Structure                      | Coordinates |           |           |           |
|--------------------------------|-------------|-----------|-----------|-----------|
| $[\text{UHC}_3]^+ \text{ (V)}$ | U           | -3.229849 | 1.070378  | -0.424760 |
|                                | C           | -1.051291 | 0.744150  | -0.050543 |
|                                | H           | -0.496983 | 1.487813  | -0.650181 |
|                                | H           | -0.863313 | 0.958928  | 1.016452  |
|                                | H           | -0.647163 | -0.251479 | -0.277653 |
| TSV→VI                         | U           | -0.144523 | -0.029693 | 0.077337  |
|                                | C           | 1.841721  | -0.046066 | -0.113663 |
|                                | H           | 1.094027  | 1.456999  | 0.264581  |
|                                | H           | 1.844518  | -0.514780 | 0.926735  |
|                                | H           | 2.864219  | 0.166717  | -0.428522 |
| VI                             | U           | -0.158534 | -0.021627 | 0.000116  |
|                                | C           | 1.797320  | -0.074316 | 0.000214  |
|                                | H           | -0.162265 | 1.919575  | 0.000483  |
|                                | H           | 1.691996  | 1.071263  | -0.000749 |
|                                | H           | 2.840425  | -0.394214 | 0.000252  |
| TSVI→VII                       | U           | -0.101902 | -0.334237 | 0.129433  |
|                                | C           | -1.902672 | -0.031357 | 0.168578  |
|                                | H           | 1.347701  | -0.836122 | 1.269504  |
|                                | H           | -2.937510 | 0.251984  | -0.052234 |
|                                | H           | -0.512837 | 1.359050  | 0.841539  |
| VII                            | U           | -2.040602 | 2.495685  | 0.296486  |
|                                | C           | -0.594519 | 1.482386  | -0.193966 |
|                                | H           | -3.896870 | 2.089663  | 0.051561  |
|                                | H           | 0.270053  | 0.875880  | -0.488449 |

|                                         |   |           |           |           |
|-----------------------------------------|---|-----------|-----------|-----------|
|                                         | H | -2.041928 | 4.198148  | 1.175068  |
| [UCH <sub>2</sub> ] <sup>+</sup> (VIII) | U | -0.031581 | -0.542943 | -0.308088 |
|                                         | C | 1.673282  | 0.446644  | 0.078745  |
|                                         | H | 2.407315  | 1.216184  | 0.320893  |
|                                         | H | 2.193149  | -0.549859 | -0.091370 |
| TSVI→IX                                 | U | -0.180368 | -0.086920 | 0.017698  |
|                                         | C | 1.722862  | -0.193159 | 0.051252  |
|                                         | H | 0.339339  | 1.879686  | 0.033596  |
|                                         | H | 1.321782  | 1.221277  | -0.088804 |
|                                         | H | 2.805327  | -0.320204 | -0.013424 |
| IX                                      | U | -2.063659 | 0.725809  | 0.197760  |
|                                         | C | -1.530068 | 2.364932  | -0.630669 |
|                                         | H | -1.636237 | 2.577024  | 0.785642  |
|                                         | H | -1.184307 | 3.275558  | -1.135105 |
|                                         | H | -1.889596 | 2.176341  | 1.565273  |
| [UCH] <sup>+</sup> (X)                  | U | -0.000000 | 0.000000  | 0.141080  |
|                                         | C | 0.000000  | -0.000000 | -1.698121 |
|                                         | H | 0.000000  | -0.000000 | -2.790609 |

Table 8.5: [UCH<sub>3</sub>]<sup>+</sup> Dissociation B3LYP/SDD/6-311+g(d,p) Triplet Spin Energies (Hartree)

| Structure                                          | E0         | E_ZPE   | E_tot   | H_corr  | G_corr  | E0+E_ZPE   | E0+E_tot   | E0+H_corr  | E0+G_corr  |
|----------------------------------------------------|------------|---------|---------|---------|---------|------------|------------|------------|------------|
| [UHC <sub>3</sub> ] <sup>+</sup> (V)               | -516.58290 | .03202  | .03595  | .03690  | .00328  | -516.55087 | -516.54694 | -516.54600 | -516.57961 |
| TSV→VI                                             | -516.51239 | .02468  | .02869  | .02963  | -.00426 | -516.48772 | -516.48371 | -516.48276 | -516.51665 |
| VI                                                 | -516.52012 | .02520  | .02974  | .03068  | -.00426 | -516.49492 | -516.49039 | -516.48944 | -516.52438 |
| TSVI→VII                                           | -516.42836 | .01992  | .02413  | .02507  | -.00919 | -516.40844 | -516.40423 | -516.40329 | -516.43755 |
| VII                                                | -516.42859 | .02041  | .02518  | .02612  | -.00917 | -516.40818 | -516.40341 | -516.40247 | -516.43776 |
| H (2)                                              | -.50216    | .00000  | .00142  | .00236  | -.01065 | -.50216    | -.50074    | -.49980    | -.51281    |
| [UCH <sub>2</sub> ] <sup>+</sup> (2)               | -515.91385 | .02081  | .02408  | .02503  | -.00590 | -515.89304 | -515.88977 | -515.88883 | -515.91975 |
| H + [UCH <sub>2</sub> ] <sup>+</sup> (VIII)        | -516.41601 | .02081  | .02550  | .02739  | -.01656 | -516.39520 | -516.39051 | -516.38862 | -516.43256 |
| H-UCH <sub>2</sub> <sup>+</sup> BDE                | .10996     | -.00476 | -.00431 | -.00336 | -.01371 | .10520     | .10565     | .10660     | .09625     |
| TSVI→IX                                            | -516.48409 | .02297  | .02675  | .02770  | -.00542 | -516.46112 | -516.45734 | -516.45639 | -516.48951 |
| IX                                                 | -516.49099 | .02654  | .03028  | .03123  | -.00138 | -516.46445 | -516.46071 | -516.45977 | -516.49237 |
| [UCH] <sup>+</sup>                                 | -1.17957   | .01007  | .01243  | .01337  | -.00142 | -1.16950   | -1.16714   | -1.16620   | -1.18099   |
| H <sub>2</sub>                                     | -515.23631 | .01202  | .01474  | .01569  | -.01194 | -515.22429 | -515.22157 | -515.22063 | -515.24825 |
| H <sub>2</sub> + [UCH] <sup>+</sup> (X)            | -516.41588 | .02209  | .02717  | .02906  | -.01336 | -516.39380 | -516.38872 | -516.38683 | -516.42924 |
| 5f <sup>3</sup> 7s <sup>2</sup> U <sup>+</sup> (2) | -476.56467 | .00000  | .00142  | .00236  | -.01839 | -476.56467 | -476.56325 | -476.56231 | -476.58306 |
| CH <sub>3</sub> (2)                                | -39.85517  | .02963  | .03268  | .03362  | .01154  | -39.82554  | -39.82249  | -39.82155  | -39.84363  |
| U <sup>+</sup> + CH <sub>3</sub> (XI)              | -516.41984 | .02963  | .03409  | .03598  | -.00685 | -516.39020 | -516.38574 | -516.38386 | -516.42669 |
| U <sup>+</sup> -CH <sub>3</sub> BDE                | .15326     | -.00229 | -.00181 | -.00086 | -.01048 | .15097     | .15146     | .15240     | .14279     |

Table 8.5.1: [UCH<sub>3</sub>]<sup>+</sup> Rearrangement B3LYP/SDD/6-311+g(d,p) Triplet Spin Structure Coordinates

| Structure                            | Coordinates |           |           |           |
|--------------------------------------|-------------|-----------|-----------|-----------|
| [UHC <sub>3</sub> ] <sup>+</sup> (V) | U           | -3.253294 | 1.047442  | -0.437384 |
|                                      | C           | -1.044015 | 0.762871  | -0.042847 |
|                                      | H           | -0.472086 | 1.487361  | -0.644763 |
|                                      | H           | -0.837913 | 0.958493  | 1.021838  |
|                                      | H           | -0.681292 | -0.246377 | -0.283530 |
| TSV→VI                               | U           | -0.168782 | -0.022172 | 0.032049  |
|                                      | C           | 1.850745  | -0.068118 | -0.099086 |

|                                         |   |           |           |           |
|-----------------------------------------|---|-----------|-----------|-----------|
|                                         | H | 1.073854  | 1.473243  | 0.301303  |
|                                         | H | 1.886670  | -0.492567 | 0.948918  |
|                                         | H | 2.857476  | 0.142792  | -0.456716 |
| VI                                      | U | -0.166444 | -0.021079 | -0.027568 |
|                                         | C | 1.813022  | -0.058423 | 0.001394  |
|                                         | H | -0.236947 | 1.932740  | -0.002501 |
|                                         | H | 1.762938  | 1.079559  | 0.016929  |
|                                         | H | 2.836373  | -0.432115 | 0.012063  |
| TSVI→VII                                | U | -0.047424 | -0.238844 | 0.037183  |
|                                         | C | -1.894364 | -0.034593 | 0.097617  |
|                                         | H | 1.235936  | -0.926968 | 1.301565  |
|                                         | H | -2.954917 | 0.204687  | -0.024664 |
|                                         | H | -0.476124 | 1.363200  | 0.966775  |
| VII                                     | U | -2.054204 | 2.503468  | 0.302377  |
|                                         | C | -0.587527 | 1.477407  | -0.196833 |
|                                         | H | -3.918081 | 2.067617  | 0.038586  |
|                                         | H | 0.276786  | 0.872319  | -0.490534 |
|                                         | H | -2.020841 | 4.220952  | 1.187105  |
| [UCH <sub>2</sub> ] <sup>+</sup> (VIII) | U | -0.038234 | -0.529051 | -0.305513 |
|                                         | C | 1.681708  | 0.432800  | 0.075898  |
|                                         | H | 2.389871  | 1.222269  | 0.320892  |
|                                         | H | 2.208820  | -0.555992 | -0.091097 |
| TSVI→IX                                 | U | -0.205463 | -0.138446 | 0.051410  |
|                                         | C | 1.715021  | -0.215597 | 0.048744  |
|                                         | H | 0.479251  | 1.841256  | -0.055552 |
|                                         | H | 1.222110  | 1.291901  | 0.012727  |
|                                         | H | 2.798021  | -0.278433 | -0.057010 |
| IX                                      | U | -2.063659 | 0.725809  | 0.197760  |
|                                         | C | -1.530068 | 2.359832  | -0.632369 |
|                                         | H | -1.763737 | 2.602524  | 0.817942  |
|                                         | H | -1.153707 | 3.270458  | -1.113005 |
|                                         | H | -1.792696 | 2.183141  | 1.570373  |
| [UCH] <sup>+</sup> (X)                  | U | -0.000000 | 0.000000  | 0.143174  |
|                                         | C | 0.000000  | -0.000000 | -1.725919 |
|                                         | H | 0.000000  | -0.000000 | -2.816462 |

Table 8.6: [UCH<sub>3</sub>]<sup>+</sup> Dissociation PBE1PBE/SDD/6-311+g(d,p) Triplet Spin Energies (Hartree)

| Structure                                   | E0         | E_ZPE   | E_tot   | H_corr  | G_corr  | E0+E_ZPE   | E0+E_tot   | E0+H_corr  | E0+G_corr  |
|---------------------------------------------|------------|---------|---------|---------|---------|------------|------------|------------|------------|
| [UHC <sub>3</sub> ] <sup>+</sup> (V)        | -516.58290 | .03202  | .03595  | .03690  | .00328  | -516.55087 | -516.54694 | -516.54600 | -516.57961 |
| TSV→VI                                      | -516.51239 | .02468  | .02869  | .02963  | -.00426 | -516.48772 | -516.48371 | -516.48276 | -516.51665 |
| VI                                          | -516.52012 | .02520  | .02974  | .03068  | -.00426 | -516.49492 | -516.49039 | -516.48944 | -516.52438 |
| TSVI→VII                                    | -516.42836 | .01992  | .02413  | .02507  | -.00919 | -516.40844 | -516.40423 | -516.40329 | -516.43755 |
| VII                                         | -516.42859 | .02041  | .02518  | .02612  | -.00917 | -516.40818 | -516.40341 | -516.40247 | -516.43776 |
| H (2)                                       | -.50104    | .00000  | .00142  | .00236  | -.01065 | -.50104    | -.49962    | -.49868    | -.51169    |
| [UCH <sub>2</sub> ] <sup>+</sup> (2)        | -515.76260 | .02120  | .02441  | .02536  | -.00548 | -515.74140 | -515.73818 | -515.73724 | -515.76807 |
| H + [UCH <sub>2</sub> ] <sup>+</sup> (VIII) | -516.26363 | .02120  | .02583  | .02772  | -.01613 | -516.24243 | -516.23781 | -516.23592 | -516.27977 |
| H-UCH <sub>2</sub> <sup>+</sup> BDE         | .10855     | -.00556 | -.00476 | -.00381 | -.01491 | .10298     | .10379     | .10473     | .09363     |
| TSVI→IX                                     | -516.32935 | .02299  | .02689  | .02783  | -.00566 | -516.30637 | -516.30246 | -516.30152 | -516.33501 |
| IX                                          | -516.34030 | .02663  | .03044  | .03138  | -.00137 | -516.31367 | -516.30986 | -516.30892 | -516.34167 |
| [UCH] <sup>+</sup>                          | -1.16816   | .01005  | .01241  | .01336  | -.00144 | -1.15811   | -1.15575   | -1.15480   | -1.16960   |
| H <sub>2</sub>                              | -515.09093 | .01233  | .01501  | .01595  | -.01158 | -515.07860 | -515.07592 | -515.07498 | -515.10251 |
| H <sub>2</sub> + [UCH] <sup>+</sup> (X)     | -516.25908 | .02238  | .02742  | .02931  | -.01302 | -516.23670 | -516.23167 | -516.22978 | -516.27211 |

|                                                    |            |         |         |         |         |            |            |            |            |
|----------------------------------------------------|------------|---------|---------|---------|---------|------------|------------|------------|------------|
| 5f <sup>3</sup> 7s <sup>2</sup> U <sup>+</sup> (2) | -476.44907 | .00000  | .00142  | .00236  | -.01839 | -476.44907 | -476.44765 | -476.44671 | -476.46746 |
| CH <sub>3</sub> (2)                                | -39.79550  | .02974  | .03280  | .03374  | .01165  | -39.76575  | -39.76270  | -39.76176  | -39.78385  |
| U <sup>+</sup> + CH <sub>3</sub> (XI)              | -516.24456 | .02974  | .03421  | .03610  | -.00675 | -516.21482 | -516.21035 | -516.20846 | -516.25131 |
| U <sup>+</sup> -CH <sub>3</sub> BDE                | .17005     | -.00220 | -.00178 | -.00084 | -.01032 | .16785     | .16827     | .16921     | .15973     |

Table 8.6.1: [UCH<sub>3</sub>]<sup>+</sup> Rearrangement PBE1PBE/SDD/6-311+g(d,p) Triplet Spin Structure Coordinates

| Structure                               | Coordinates |           |           |           |
|-----------------------------------------|-------------|-----------|-----------|-----------|
| [UHC <sub>3</sub> ] <sup>+</sup> (V)    | U           | -3.229849 | 1.070378  | -0.424760 |
|                                         | C           | -1.051291 | 0.744150  | -0.050543 |
|                                         | H           | -0.496983 | 1.487813  | -0.650181 |
|                                         | H           | -0.863313 | 0.958928  | 1.016452  |
|                                         | H           | -0.647163 | -0.251479 | -0.277653 |
| TSV→VI                                  | U           | -0.144523 | -0.029693 | 0.077337  |
|                                         | C           | 1.841721  | -0.046066 | -0.113663 |
|                                         | H           | 1.094027  | 1.456999  | 0.264581  |
|                                         | H           | 1.844518  | -0.514780 | 0.926735  |
|                                         | H           | 2.864219  | 0.166717  | -0.428522 |
| VI                                      | U           | -0.158534 | -0.021627 | 0.000116  |
|                                         | C           | 1.797320  | -0.074316 | 0.000214  |
|                                         | H           | -0.162265 | 1.919575  | 0.000483  |
|                                         | H           | 1.691996  | 1.071263  | -0.000749 |
|                                         | H           | 2.840425  | -0.394214 | 0.000252  |
| TSVI→VII                                | U           | -0.101902 | -0.334237 | 0.129433  |
|                                         | C           | -1.902672 | -0.031357 | 0.168578  |
|                                         | H           | 1.347701  | -0.836122 | 1.269504  |
|                                         | H           | -2.937510 | 0.251984  | -0.052234 |
|                                         | H           | -0.512837 | 1.359050  | 0.841539  |
| VII                                     | U           | -2.040602 | 2.495685  | 0.296486  |
|                                         | C           | -0.594519 | 1.482386  | -0.193966 |
|                                         | H           | -3.896870 | 2.089663  | 0.051561  |
|                                         | H           | 0.270053  | 0.875880  | -0.488449 |
|                                         | H           | -2.041928 | 4.198148  | 1.175068  |
| [UCH <sub>2</sub> ] <sup>+</sup> (VIII) | U           | -0.031581 | -0.542943 | -0.308088 |
|                                         | C           | 1.673282  | 0.446644  | 0.078745  |
|                                         | H           | 2.407315  | 1.216184  | 0.320893  |
|                                         | H           | 2.193149  | -0.549859 | -0.091370 |
| TSVI→IX                                 | U           | -0.191086 | -0.128977 | 0.045031  |
|                                         | C           | 1.715911  | -0.223046 | 0.063751  |
|                                         | H           | 0.464833  | 1.843538  | -0.056356 |
|                                         | H           | 1.221157  | 1.294533  | 0.015973  |
|                                         | H           | 2.798125  | -0.285366 | -0.068080 |
| IX                                      | U           | -2.063659 | 0.725809  | 0.197760  |
|                                         | C           | -1.530068 | 2.359832  | -0.632369 |
|                                         | H           | -1.763737 | 2.602524  | 0.817942  |
|                                         | H           | -1.153707 | 3.270458  | -1.113005 |
|                                         | H           | -1.792696 | 2.183141  | 1.570373  |
| [UCH] <sup>+</sup> (X)                  | U           | -0.000000 | 0.000000  | 0.143174  |
|                                         | C           | 0.000000  | -0.000000 | -1.725919 |
|                                         | H           | 0.000000  | -0.000000 | -2.816462 |

Table 8.7.1: [UCH<sub>3</sub>]<sup>+</sup> Rearrangement B3LYP/SDD/6-311+g(d,p) Quintet Spin Relative Energies (kJ/mol)

| Structure | E0+E_ZPE |          | E0+H_cor | E0+G_cor |
|-----------|----------|----------|----------|----------|
|           |          | E0+E_tot | r        | r        |

|                                         |          |          |          |          |
|-----------------------------------------|----------|----------|----------|----------|
| [UHC <sub>3</sub> ] <sup>+</sup> (V)    | -107.903 | -106.598 | -106.601 | -111.004 |
| TSV→VI                                  | 57.916   | 59.423   | 59.420   | 54.303   |
| VI                                      | 38.991   | 41.890   | 41.887   | 33.998   |
| TSVI→VII                                | 266.063  | 268.092  | 268.090  | 261.988  |
| VII                                     | 266.743  | 270.245  | 270.243  | 261.434  |
| [UCH <sub>2</sub> ] <sup>+</sup> (VIII) | 237.088  | 240.349  | 242.827  | 209.565  |
| TSVI→IX                                 | 148.761  | 148.574  | 148.572  | 146.445  |
| IX                                      | 152.468  | 153.770  | 153.768  | 148.850  |
| [UCH] <sup>+</sup> (X)                  | 190.585  | 196.025  | 198.504  | 170.665  |
| U <sup>+</sup> + CH <sub>3</sub> (XI)   | 149.504  | 152.195  | 154.673  | 124.346  |

Table 8.7.2: [UCH<sub>3</sub>]<sup>+</sup> Rearrangement PBE1PBE/SDD/6-311+g(d,p) Quintet Spin Relative Energies (kJ/mol)

| Structure                               | EO+E_ZPE | EO+E_tot   | EO+H_cor<br>r | EO+G_cor<br>r |
|-----------------------------------------|----------|------------|---------------|---------------|
| [UHC <sub>3</sub> ] <sup>+</sup> (V)    | -37.715  | -36.187    | -36.187       | -41.063       |
| TSV→VI                                  | 125.790  | 127.342    | 127.345       | 122.136       |
| VI                                      | 111.762  | 114.635    | 114.635       | 106.853       |
| TSVI→VII                                | 342.355  | 344.350    | 344.350       | 338.327       |
| VII                                     | 343.331  | 346.839    | 346.842       | 338.007       |
| [UCH <sub>2</sub> ] <sup>+</sup> (VIII) | 313.298  | 316.541    | 319.019       | 285.786       |
| TSVI→IX                                 | 208.950  | 208.814    | 208.817       | 206.569       |
| IX                                      | 218.184  | 219.584    | 219.586       | 214.537       |
| U <sup>+</sup> + CH <sub>3</sub> (XI)   | 266.961  | 272.411    | 274.890       | 247.201       |
| [UCH <sub>2</sub> ] <sup>+</sup> (VIII) | 256.787  | 259.522818 | 262.0039      | 231.5691      |

Table 8.7.3: [UCH<sub>3</sub>]<sup>+</sup> Rearrangement B3LYP/SDD/6-311+g(d,p) Singlet Spin Relative Energies (kJ/mol)

| Structure                               | EO+E_ZPE | EO+E_tot | EO+H_cor<br>r | EO+G_cor<br>r |
|-----------------------------------------|----------|----------|---------------|---------------|
| [UHC <sub>3</sub> ] <sup>+</sup> (V)    | 123.409  | 125.063  | 125.060       | 123.958       |
| TSV→VI                                  | 198.294  | 198.338  | 198.336       | 200.609       |
| VI                                      | 151.759  | 152.710  | 152.707       | 153.363       |
| TSVI→VII                                | 298.732  | 300.147  | 300.145       | 300.145       |
| VII                                     | 278.776  | 282.782  | 282.782       | 275.360       |
| [UCH <sub>2</sub> ] <sup>+</sup> (VIII) | 300.825  | 304.112  | 306.590       | 275.071       |
| TSVI→IX                                 | 270.865  | 270.760  | 270.760       | 272.527       |
| IX                                      | 232.428  | 233.628  | 233.625       | 233.473       |
| [UCH] <sup>+</sup> (X)                  | 304.503  | 308.822  | 311.300       | 283.790       |
| U <sup>+</sup> + CH <sub>3</sub> (XI)   | 313.934  | 316.625  | 319.103       | 290.496       |

Table 8.7.4: [UCH<sub>3</sub>]<sup>+</sup> Rearrangement PBE1PBE/SDD/6-311+g(d,p) Singlet Spin Relative Energies (kJ/mol)

| Structure                            | EO+E_ZPE | EO+E_tot | EO+H_cor<br>r | EO+G_cor<br>r |
|--------------------------------------|----------|----------|---------------|---------------|
| [UHC <sub>3</sub> ] <sup>+</sup> (V) | 223.223  | 225.433  | 225.433       | 222.900       |

|                                         |         |         |         |         |
|-----------------------------------------|---------|---------|---------|---------|
| TSV→VI                                  | 277.481 | 277.400 | 277.400 | 279.944 |
| VI                                      | 227.421 | 228.056 | 228.056 | 229.261 |
| TSVI→VII                                | 375.596 | 376.980 | 376.980 | 377.229 |
| VII                                     | 357.417 | 361.308 | 361.308 | 354.991 |
| [UCH <sub>2</sub> ] <sup>+</sup> (VIII) | 362.235 | 365.391 | 367.869 | 336.526 |
| TSVI→IX                                 | 353.426 | 353.358 | 353.358 | 355.041 |
| IX                                      | 299.990 | 300.410 | 300.410 | 302.032 |
| [UCH] <sup>+</sup> (X)                  | 377.284 | 381.506 | 383.985 | 356.632 |
| U <sup>+</sup> + CH <sub>3</sub> (XI)   | 434.741 | 437.477 | 439.955 | 411.240 |

Table 8.7.5: [UCH<sub>3</sub>]<sup>+</sup> Rearrangement B3LYP/SDD/6-311+g(d,p) Triplet Spin Relative Energies (kJ/mol)

| Structure                               | E0+E_ZPE | E0+E_tot | E0+H_cor<br>r | E0+G_cor<br>r |
|-----------------------------------------|----------|----------|---------------|---------------|
| [UHC <sub>3</sub> ] <sup>+</sup> (V)    | -82.438  | -81.026  | -81.028       | -84.389       |
| TSV→VI                                  | 55.700   | 56.622   | 56.619        | 54.364        |
| VI                                      | 24.630   | 26.722   | 26.720        | 22.377        |
| TSVI→VII                                | 284.630  | 286.663  | 286.663       | 282.115       |
| VII                                     | 273.672  | 277.124  | 277.122       | 269.492       |
| [UCH <sub>2</sub> ] <sup>+</sup> (VIII) | 300.825  | 304.112  | 306.590       | 275.071       |
| TSVI→IX                                 | 127.733  | 128.655  | 128.655       | 125.565       |
| IX                                      | 118.990  | 119.796  | 119.796       | 118.042       |
| [UCH] <sup>+</sup> (X)                  | 304.503  | 308.822  | 311.300       | 283.790       |
| U <sup>+</sup> + CH <sub>3</sub> (XI)   | 313.934  | 316.625  | 319.103       | 290.496       |

Table 8.7.6: [UCH<sub>3</sub>]<sup>+</sup> Rearrangement PBE1PBE/SDD/6-311+g(d,p) Triplet Spin Relative Energies (kJ/mol)

| Structure                               | E0+E_ZPE | E0+E_tot | E0+H_cor<br>r | E0+G_cor<br>r |
|-----------------------------------------|----------|----------|---------------|---------------|
| [UHC <sub>3</sub> ] <sup>+</sup> (V)    | -5.939   | -4.314   | -4.314        | -8.142        |
| TSV→VI                                  | 122.747  | 123.317  | 123.317       | 121.818       |
| VI                                      | 91.850   | 92.893   | 92.893        | 90.687        |
| TSVI→VII                                | 369.642  | 371.915  | 371.915       | 366.953       |
| VII                                     | 355.887  | 359.090  | 359.090       | 352.145       |
| [UCH <sub>2</sub> ] <sup>+</sup> (VIII) | 362.235  | 365.391  | 367.869       | 336.526       |
| TSVI→IX                                 | 194.382  | 195.631  | 195.631       | 191.478       |
| IX                                      | 175.213  | 176.210  | 176.213       | 174.002       |
| [UCH] <sup>+</sup> (X)                  | 377.284  | 381.506  | 383.985       | 356.632       |
| U <sup>+</sup> + CH <sub>3</sub> (XI)   | 434.741  | 437.477  | 439.955       | 411.240       |

Figure 10.1 Dissociation of [UCH<sub>3</sub>]<sup>+</sup> B3LYP/SDD/6-311+g(d,p) Quintet Spin Relative Enthalpy (kJ/mol)

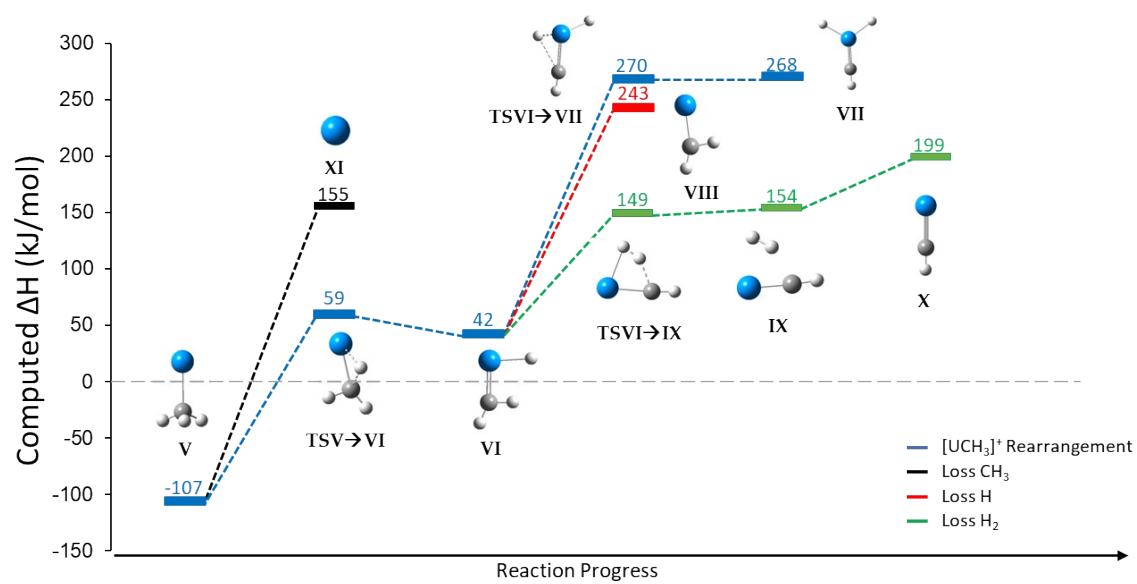

Figure 10.2 Dissociation of [UCH<sub>3</sub>]<sup>+</sup> PBE0/SDD/6-311+g(d,p) Quintet Spin Relative Enthalpy (kJ/mol)

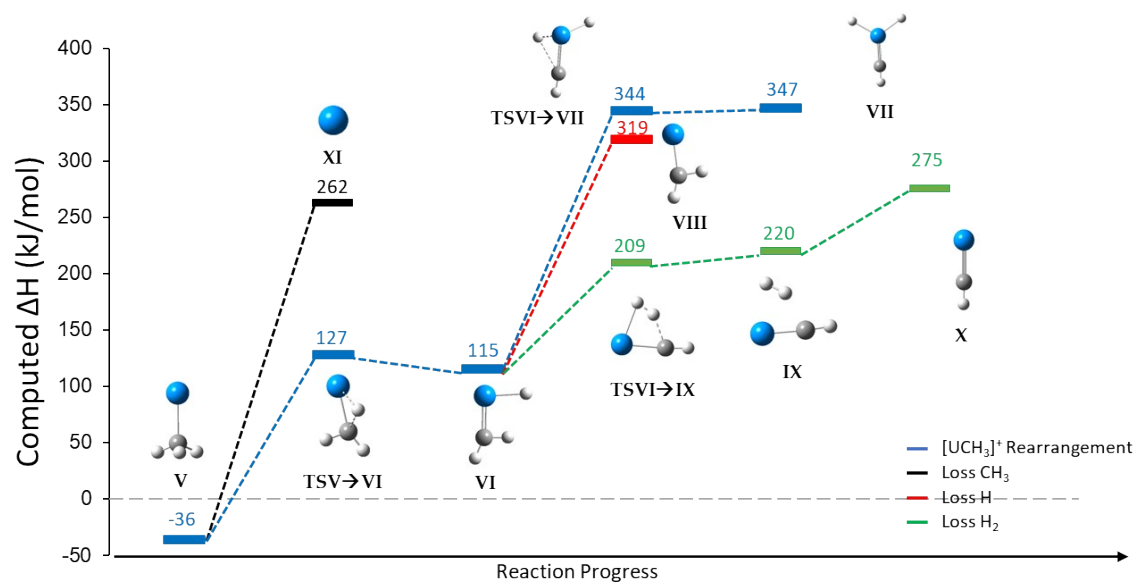

Figure 11.1 CID Mass Spectra of the Dissociation of  $[\text{UCH}_3]^+$

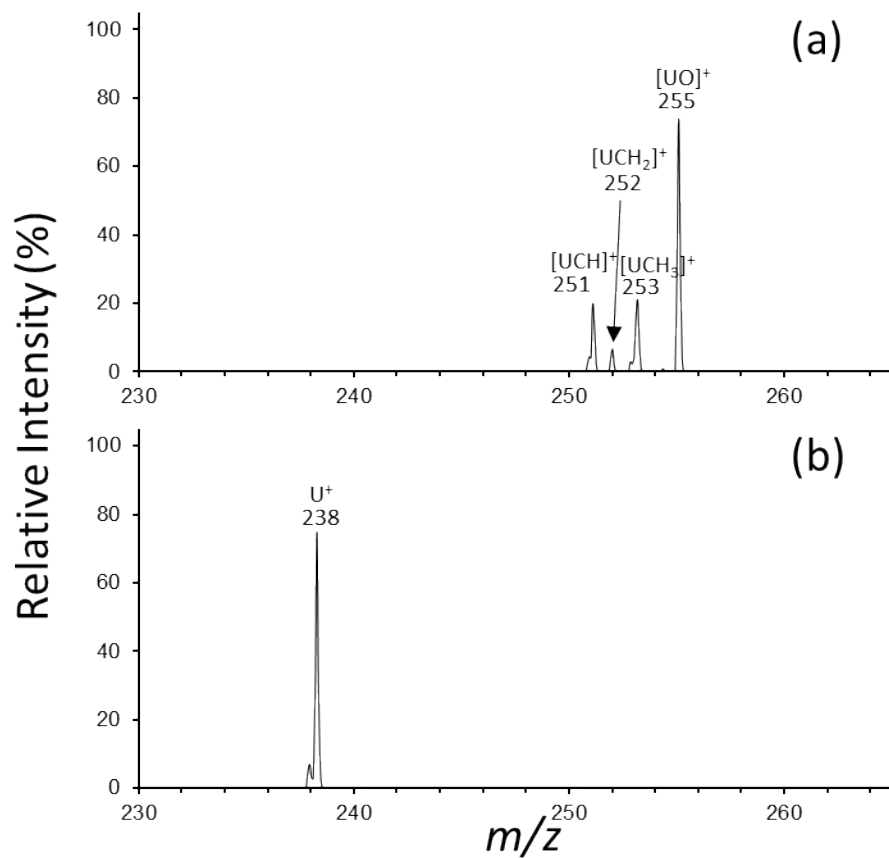

Figure 11.1 : (a) CID of  $m/z$  253 ( $[UCH_3]^+$ ) at 10 NCE and a 0.30  $q_z$  to produce  $[UCH_2]^+$  and  $[UCH]^+$ . (b) CID of  $m/z$  253 ( $[UCH_3]^+$ ) at 25 NCE and a 0.7  $q_z$  to produce  $U^+$  at  $m/z$  238. Note that CID is a slow heating process, and harsher conditions are required to access higher energy channels shown in Figures 10.1 and 10.2.
